# Supplementary material for: Mechanism and origins of selectivity in the enantioselective oxa-Pictet–Spengler reaction: a cooperative catalytic complex from a hydrogen bond donor and chiral phosphoric acid
Source: Royal Society of Chemistry journal article supplement (doi:10.1039/d0sc03250f), 2020-01-01
Supplement: d0sc03250f1.pdf [file d0sc03250f1.pdf]

## Mechanism and Origins of Selectivity in the Enantioselective *oxa*-Pictet-Spengler Reaction: A Cooperative Catalytic Complex from a Hydrogen Bond Donor and Chiral Phosphoric Acid

Mark A. Maskeri,<sup>†a</sup> Alexander C. Brueckner,<sup>†b</sup> Taisiia Feoktistova,<sup>b</sup> Matthew J. O'Connor,<sup>a</sup>  
Daniel M. Walden,<sup>b</sup> Paul Ha-Yeon Cheong,<sup>\*b</sup> and Karl A. Scheidt<sup>\*a</sup>

<sup>a</sup>Department of Chemistry, Center for Molecular Innovation and Drug Discovery, Northwestern University, Evanston, IL 60208, USA.

<sup>b</sup>Department of Chemistry, Oregon State University, Corvallis, OR 97331, USA.

\* Correspondence to: cheongh@oregonstate.edu and scheidt@northwestern.edu

† These authors contributed equally to this work.

## Supporting Information

### Table of Contents

|                                                                                       |     |
|---------------------------------------------------------------------------------------|-----|
| General Information .....                                                             | S2  |
| DOSY Analysis .....                                                                   | S3  |
| Selected DOSY Spectra .....                                                           | S4  |
| <sup>31</sup> P-NMR CPA/HBD Spectra .....                                             | S5  |
| Kinetics Data Analysis .....                                                          | S6  |
| Complete Authorship of Gaussian 09.....                                               | S10 |
| General Computational Procedure .....                                                 | S10 |
| Assembly Model Systems .....                                                          | S11 |
| Rationalizing Transition State Motifs .....                                           | S12 |
| Origins of Stereoselectivity Model System.....                                        | S15 |
| Computed Geometries, Energies, and Thermal & Dispersion & Solvation Corrections ..... | S17 |
| Bibliography .....                                                                    | S72 |

**General Information**

All reactions were carried out under an argon atmosphere in oven-dried glassware with magnetic stirring. Reagents were purified prior to use following the guidelines of Perrin and Armarego unless otherwise stated.<sup>1</sup> Purification of select reaction products was carried out by flash chromatography using a Biotage Isolera instrument (230–400 mesh silica). Analytical thin layer chromatography was performed on EM Reagent 0.25 mm silica gel 60-F plates. Visualization was accomplished with UV light and ceric ammonium nitrate stain, anisaldehyde stain, or potassium permanganate stain followed by heating. Infrared spectra were recorded on a Bruker Tensor 37 FTIR spectrometer and a Thermo Scientific Nicolet iS5 FTIR spectrometer. <sup>1</sup>H-NMR spectra were recorded on a Bruker Avance 500 MHz with direct cryoprobe (500 MHz) spectrometer and an Agilent DD2 500 MHz spectrometer and are reported in ppm using solvent as an internal standard (CDCl<sub>3</sub> at 7.26 ppm, CD<sub>3</sub>OD at 3.31 ppm, toluene-*d*<sub>8</sub> at 2.08 ppm). Data are reported as (ap = apparent, s = singlet, d = doublet, t = triplet, q = quartet, m = multiplet, br = broad; coupling constant(s) in Hz; integration). Proton-decoupled <sup>13</sup>C-NMR spectra were recorded on a Bruker Avance 500 MHz with direct cryoprobe (126 MHz) spectrometer and are reported in ppm using solvent as an internal standard (CDCl<sub>3</sub> at 77.0 ppm, CD<sub>3</sub>OD at 49.0 ppm, toluene-*d*<sub>8</sub> at 20.43 ppm). <sup>31</sup>P-NMR spectra were recorded on an Agilent DD2 500 MHz spectrometer and are reported in ppm.

Substrates and catalysts were prepared in accordance with our prior report.<sup>2</sup> Toluene was dried by passing through activated alumina and stored under dry argon prior to use. Deuterated solvents were purchased from Cambridge Isotope Laboratories (toluene-*d*<sub>8</sub>, methanol-*d*<sub>4</sub>, chloroform-*d*) and Sigma-Aldrich (toluene-*d*<sub>8</sub>); chloroform-*d* was stored over potassium carbonate, methanol-*d*<sub>4</sub> and toluene-*d*<sub>8</sub> were used as received.

**DOSY Analysis**

<sup>1</sup>H-DOSY spectra were recorded on a Bruker Avance III 600 MHz spectrometer with gradient suppression from 5-100% over 16 steps in toluene-*d*<sub>8</sub> at -40° C and were processed with MestReNova Bayesian DOSY transforms (resolution factor = 1.00, repetitions = 1; 128 points in diffusion dimension). Diffusion constants were obtained from the maxima of the 1D projection of the DOSY data.

The viscosity of toluene was utilized as a stand-in for that of toluene-*d*<sub>8</sub>; data for the deuterated species is not available at -40 °C.<sup>3</sup> Due to large relative changes in viscosity in the low-temperature regime, the viscosity of toluene at -40 °C was modeled using the high-precision reference curve<sup>4</sup> below as defined by Santos *et al.*:

for viscosity  $\eta$  and temperature  $T$ , let

$$\eta^* = \eta(T)/\eta(298.15) \text{ and } T^* = T/298.15$$

$$\eta(298.15 \text{ K}) = 554.2 \mu\text{Pa} \cdot \text{s}$$

$$\ln(\eta^*) = -5.2203 + \frac{8.964}{T^*} - \frac{5.834}{(T^*)^2} + \frac{2.089}{(T^*)^3}$$

$$\text{for } T = -40 \text{ }^\circ\text{C} = 233.15 \text{ K}$$

$$\eta(233.15 \text{ K}) = 1617.2 \mu\text{Pa} \cdot \text{s}$$

Stokes radii were determined in the spherical case as the following:

$$r = \frac{k_B T}{6\pi\eta D}$$

$$k_B = 1.380649 \times 10^{-23} \frac{\text{m}^2 \cdot \text{kg}}{\text{s}^2 \cdot \text{K}}$$

***Ternary Complex (CPA + urea + unreactive substrate analogue)***

$$\text{for } D = 1.907 \times 10^{-10} \text{ m}^2/\text{s}$$

$$r = \frac{k_B T}{6\pi\eta D} = 5.537 \times 10^{-10} \text{ m} \sim 5.5 \text{ \AA}$$

***Binary Complex (CPA + unreactive substrate analogue)***

$$\text{for } D = 1.761 \times 10^{-10} \text{ m}^2/\text{s}$$

$$r = \frac{k_B T}{6\pi\eta D} = 5.996 \times 10^{-10} \text{ m} \sim 6 \text{ \AA}$$

**Selected DOSY Spectra**

**Binary complex (CPA + allyl-substrate, toluene-d<sub>8</sub>, -40 °C)**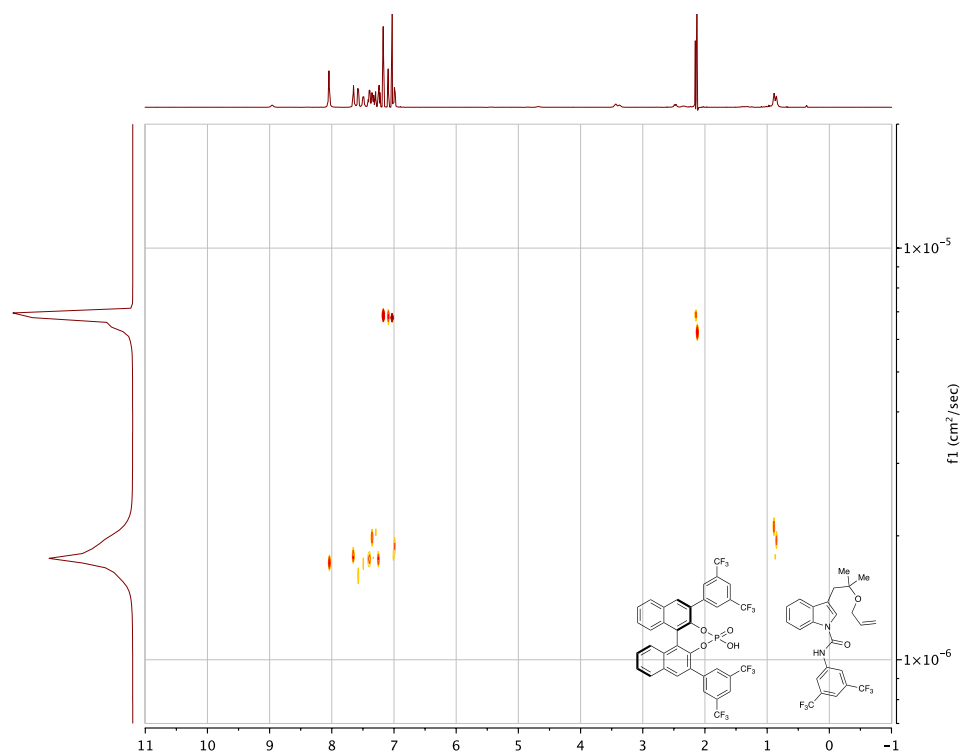**Ternary complex (CPA + allyl-substrate + urea)**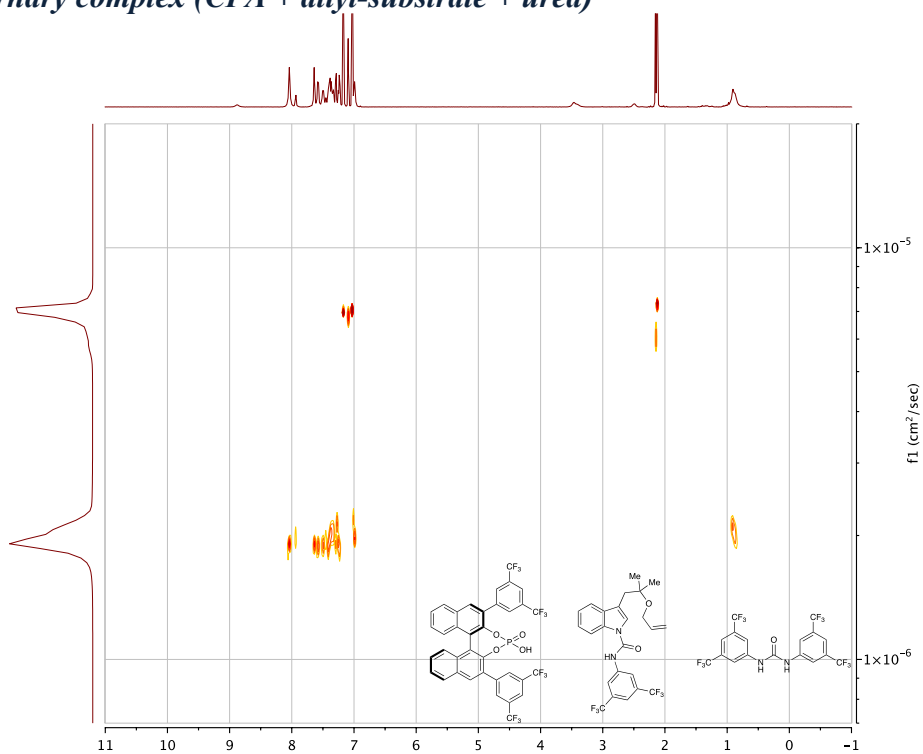

**<sup>31</sup>P-NMR CPA/HBD Spectra**tol-*d*<sub>8</sub>, -40 °C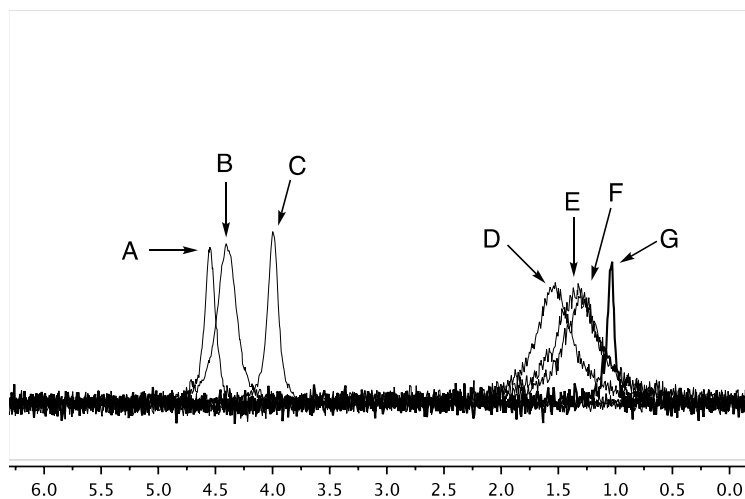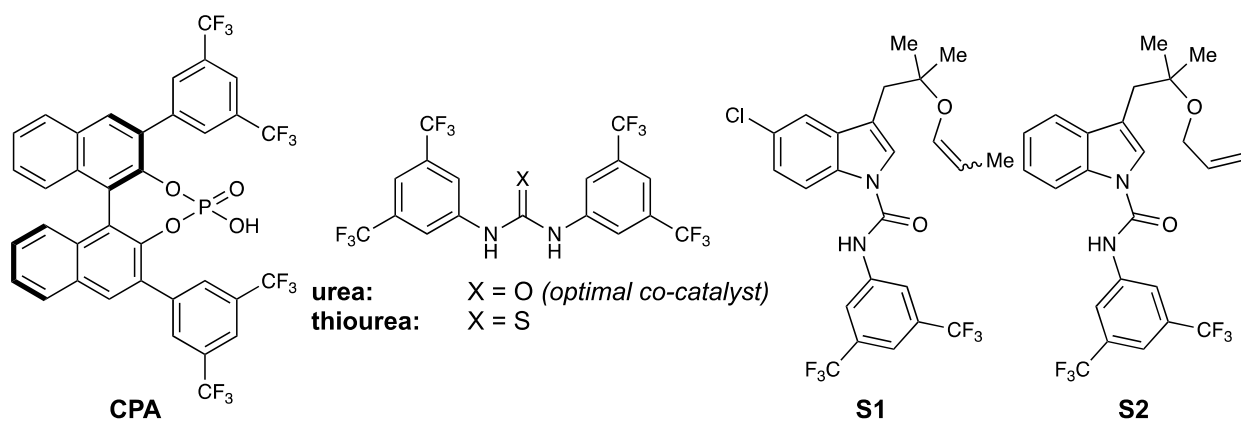

|           |                                    |          |
|-----------|------------------------------------|----------|
| <b>A:</b> | free CPA:                          | 4.58 ppm |
| <b>B:</b> | CPA + urea:                        | 4.40 ppm |
| <b>C:</b> | CPA + thiourea:                    | 4.00 ppm |
| <b>D:</b> | CPA + thiourea + <b>S2</b> :       | 1.54 ppm |
| <b>E:</b> | CPA + urea + <b>S2</b> :           | 1.35 ppm |
| <b>F:</b> | CPA + <b>S2</b> :                  | 1.29 ppm |
| <b>G:</b> | CPA + urea + <b>S1</b> (post rxn): | 1.04 ppm |

## Kinetics Data Analysis

NMR spectrographic kinetic studies were undertaken on substrate **S3** (20 mM). Due to changing homogeneity of the reaction as identified in earlier studies,<sup>2</sup> analysis of the resulting data was conducted by the method of initial rates. Previous experiments demonstrated that the cyclization of **S3** to **1o** proceeds with a rate amenable to monitoring on the NMR timescale by <sup>1</sup>H NMR spectroscopy.<sup>2</sup> All experiments were conducted in quadruplicate.

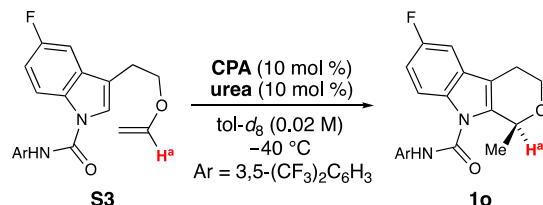

Proton **H<sup>a</sup>** was monitored by <sup>1</sup>H NMR; generation of the cyclization product **1o** was characterized by the appearance of a broadened apparent quartet at 5.4 ppm. Experiments were conducted on an Agilent DD2 500 MHz spectrometer regulated at  $-40\text{ }^\circ\text{C}$  every six seconds and consisted of two  $45^\circ$  pulse scans. FID data was processed in MestReNova with phase correction and Whittaker baseline corrections. Integration of the product peak was normalized against the integration of 0.333 equivalents of 2-methoxynaphthalene as an inert internal standard. Normalized integration data were processed by subjecting the data to a polynomial fit; the linear portion of the fitted curve was extracted, and the slope of the line determined. The slope is equated to the initial rate in [product]/time (mM/s).

To determine the order of a given component of the reaction milieu, the concentration of the component of interest was varied while holding all other components constant in concentration. Under Initial Rate conditions, the concentrations of components are considered constant over the brief linear domain, and permits the following derivation:

for rate law of the form  $r = k[A]^n[B]^m$

vary  $[A]$  holding  $B = B^0$  constant

for concentrations  $[A_1] \neq [A_2]$ :

$$r_1 = k[A_1]^n[B^0]^m$$

$$r_2 = k[A_2]^n[B^0]^m$$

$$\rightarrow \frac{r_1}{r_2} = \frac{k[A_1]^n[B^0]^m}{k[A_2]^n[B^0]^m} = \frac{[A_1]^n}{[A_2]^n} = \left(\frac{[A_1]}{[A_2]}\right)^n$$

$$\rightarrow \ln\left(\frac{r_1}{r_2}\right) = \ln\left(\frac{[A_1]}{[A_2]}\right)^n = n \cdot \ln\left(\frac{[A_1]}{[A_2]}\right)$$

$$\rightarrow n = \frac{\ln\left(\frac{r_1}{r_2}\right)}{\ln\left(\frac{[A_1]}{[A_2]}\right)} \equiv \text{reaction order with respect to reagent A}$$

Four experiments were designed to probe the three components of the reaction:

- 1) 0.020 mmol **S3** with 0.05 equivalents **CPA** and 0.1 equivalents **urea**
- 2) 0.020 mmol **S3** with 0.025 equivalents **CPA** and 0.1 equivalents **urea**
- 3) 0.020 mmol **S3** with 0.05 equivalents **CPA** and 0.05 equivalents **urea**
- 4) 0.040 mmol **S3** with 0.025 equivalents **CPA** and 0.05 equivalents **urea**

Experiment 1 functions as the baseline control; all other experiments are compared to experiment

1. Experiment 2 probes the reaction order of **CPA**. Experiment 3 probes the reaction order of the **urea**. Experiment 4 probes the reaction order of the substrate **S3**. Reaction volume is constant (1 mL of toluene- $d_8$ ) producing constant concentrations of the un-probed reagents.

**Representative NMR Data:** Trial of 0.020 mmol **S3** with 0.025 equiv **CPA A** and 0.1 equiv **urea**

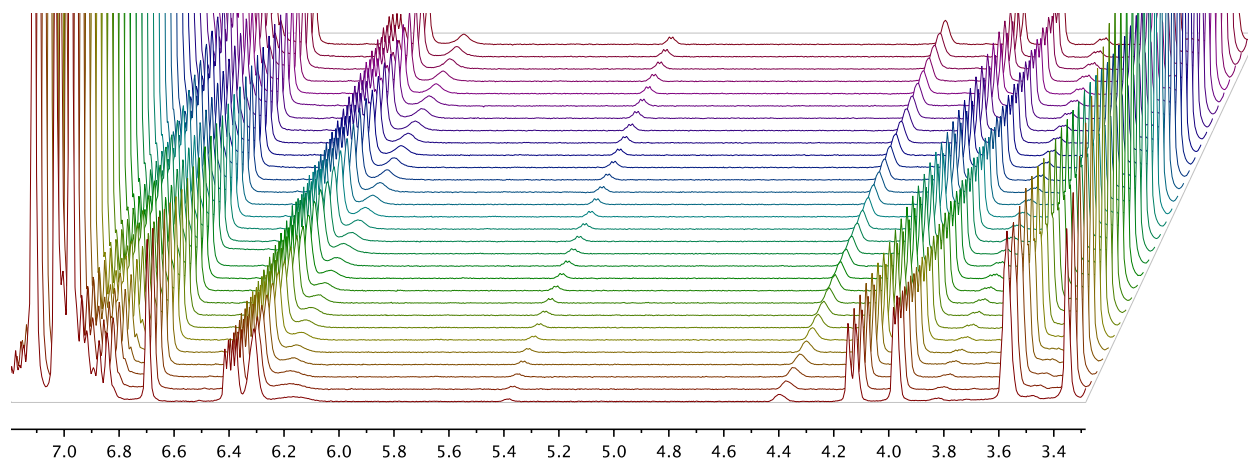

**Representative Integration Curves:**

Dotted lines are polynomial fits, solid lines are extracted linear fits of linear domains  
Vertical axes are [product **1o**] (mM); horizontal axes are time (s).

1) 0.020 mmol **S3** with 0.05 equiv **CPA** and 0.1 equiv **urea**

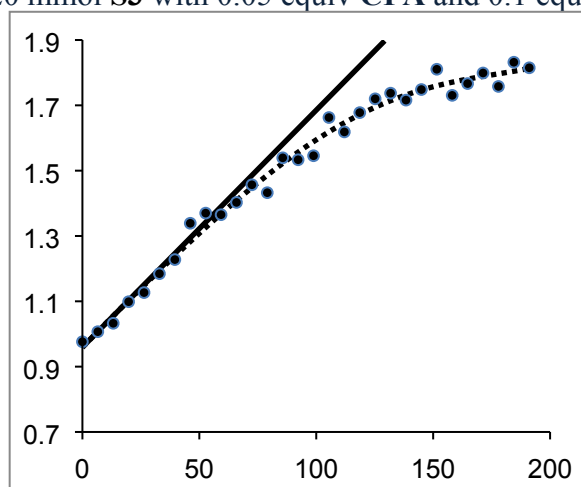

2) 0.020 mmol **S3** with 0.025 equiv **CPA** and 0.1 equiv **urea**

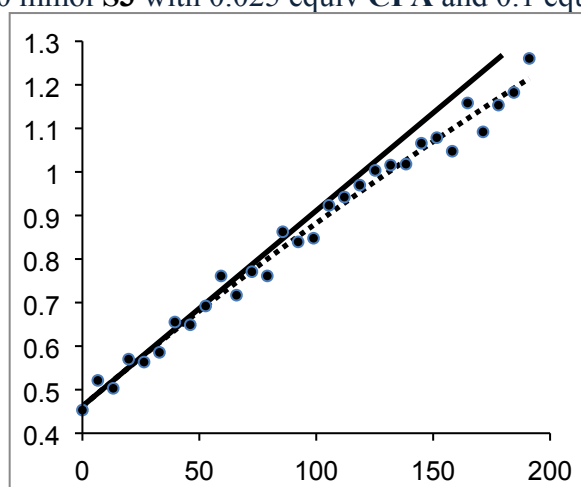

3) 0.020 mmol **S3** with 0.05 equiv **CPA** and 0.05 equiv **urea**

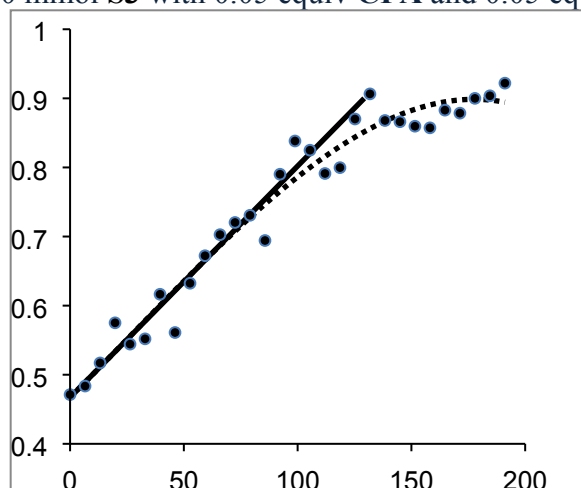

4) 0.040 mmol **S3** with 0.025 equiv **CPA** and 0.05 equiv **urea**



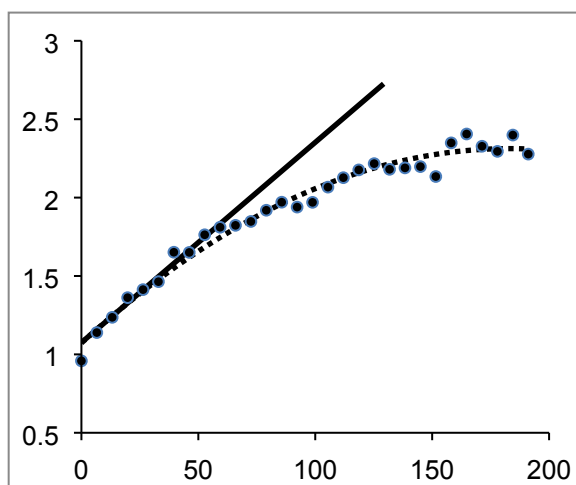**Raw Slope Data:***Experiment 1*

| Trial | Slope     |
|-------|-----------|
| 1     | 0.0077169 |
| 2     | 0.0072575 |
| 3     | 0.0070965 |
| 4     | 0.0057761 |

-----  
 Avr: 0.0069618

*Experiment 3*

| Trial | Slope     |
|-------|-----------|
| 1     | 0.0029104 |
| 2     | 0.0032138 |
| 3     | 0.0040785 |
| 4     | 0.0033492 |

-----  
 Avr: 0.0033880

*Experiment 2*

| Trial | Slope     |
|-------|-----------|
| 1     | 0.0039595 |
| 2     | 0.0060217 |
| 3     | 0.0044901 |
| 4     | 0.0050888 |

-----  
 Avr: 0.0048900

*Experiment 4*

| Trial | Slope     |
|-------|-----------|
| 1     | 0.017940  |
| 2     | 0.0094425 |
| 3     | 0.012770  |
| 4     | 0.013972  |

-----  
 Avr: 0.013531

**Data Analysis:**

*Determination of Reaction Order of CPA with respect to S3 and urea:*

$$\frac{\ln\left(\frac{r_{exp1}}{r_{exp2}}\right)}{\ln\left(\frac{[CPA_{exp1}]}{[CPA_{exp2}]}\right)} = \frac{\ln\left(\frac{0.0069618}{0.0048900}\right)}{\ln(2)} = 0.50963 \approx 0.5$$

*Determination of Reaction Order of urea with respect to CPA A and S3:*

$$\frac{\ln\left(\frac{r_{exp1}}{r_{exp3}}\right)}{\ln\left(\frac{[urea_{exp1}]}{[urea_{exp3}]}\right)} = \frac{\ln\left(\frac{0.0069618}{0.0033880}\right)}{\ln(2)} = 1.0390 \approx 1$$

*Determination of Reaction Order of S3 with respect to urea and CPA A:*

$$\frac{\ln\left(\frac{r_{exp1}}{r_{exp4}}\right)}{\ln\left(\frac{[1o_{exp1}]}{[1o_{exp4}]}\right)} = \frac{\ln\left(\frac{0.0069618}{0.013531}\right)}{\ln(0.5)} = 0.95874 \approx 1$$

### Complete Authorship of Gaussian 09

Gaussian 09, Revision **D.01**, M. J. Frisch, G. W. Trucks, H. B. Schlegel, G. E. Scuseria, M. A. Robb, J. R. Cheeseman, G. Scalmani, V. Barone, G. A. Petersson, H. Nakatsuji, X. Li, M. Caricato, A. Marenich, J. Bloino, B. G. Janesko, R. Gomperts, B. Mennucci, H. P. Hratchian, J. V. Ortiz, A. F. Izmaylov, J. L. Sonnenberg, D. Williams-Young, F. Ding, F. Lipparini, F. Egidi, J. Goings, B. Peng, A. Petrone, T. Henderson, D. Ranasinghe, V. G. Zakrzewski, J. Gao, N. Rega, G. Zheng, W. Liang, M. Hada, M. Ehara, K. Toyota, R. Fukuda, J. Hasegawa, M. Ishida, T. Nakajima, Y. Honda, O. Kitao, H. Nakai, T. Vreven, K. Throssell, J. A. Montgomery, Jr., J. E. Peralta, F. Ogliaro, M. Bearpark, J. J. Heyd, E. Brothers, K. N. Kudin, V. N. Staroverov, T. Keith, R. Kobayashi, J. Normand, K. Raghavachari, A. Rendell, J. C. Burant, S. S. Iyengar, J. Tomasi, M. Cossi, J. M. Millam, M. Klene, C. Adamo, R. Cammi, J. W. Ochterski, R. L. Martin, K. Morokuma, O. Farkas, J. B. Foresman, and D. J. Fox, Gaussian, Inc., Wallingford CT, 2016.

### General Computational Procedure

Manual, exhaustive conformation searches were performed to locate all relevant structures. All conformers were optimized using the Gaussian 09 computational package (see above reference) using PBE<sup>5</sup>-D3BJ<sup>6</sup>/6-31G(d)<sup>7</sup> with implicit solvent modelled using SMD<sup>8</sup> (Solvation Model based on Density) for toluene. Minima were confirmed with vibrational frequency computations, with ground state structures having zero imaginary vibrational frequencies and transition states having one imaginary vibrational frequency.

All results discussed in the manuscript are at the following level of theory. Single point electronic energies were obtained at the PBE/def2-TZVPP<sup>9, 10</sup> level of theory with ORCA 4.0.1.<sup>11</sup> Solvation

corrections were computed using PBE-D3BJ/6-311++G(2df,p)<sup>12, 13</sup> in toluene using SMD. Final free energies were calculated by adding the ORCA single point energies, solvation free energies, and the thermal correction to Gibbs free energy obtained from the vibration frequency calculations. All three-dimensional images were generated with CYLview.<sup>14</sup>

### Assembly Model Systems

The transition state model proposed in our initial report<sup>2</sup> leading to the major product could not be located computationally. To rationalize this outcome, we computed model systems to identify critical interactions for the assembly of the substrate, catalyst, and co-catalyst. We used the spirocycle (see **Figure 3**) to avoid the reactive oxocarbenium uncontrollably collapsing to either the spirocycle or the phosphate-ketal (analogous to **Major-TS, II**, and **I** in **Figure 7**, respectively). We identified four important observations, all summarized in **Figure S1**: (1)  $\pi$ - $\pi$  interactions are worth  $\sim 3$ -4 kcal/mol, (2) urea-substrate interactions are weak ( $\Delta G = 24.9$  kcal/mol), (3) urea-phosphate interactions are moderate ( $\Delta G = -2.1$  kcal/mol), and (4) substrate-phosphate interactions are strong ( $\Delta G = -69.3$  kcal/mol).

A)  $\pi$ - $\pi$  Interactions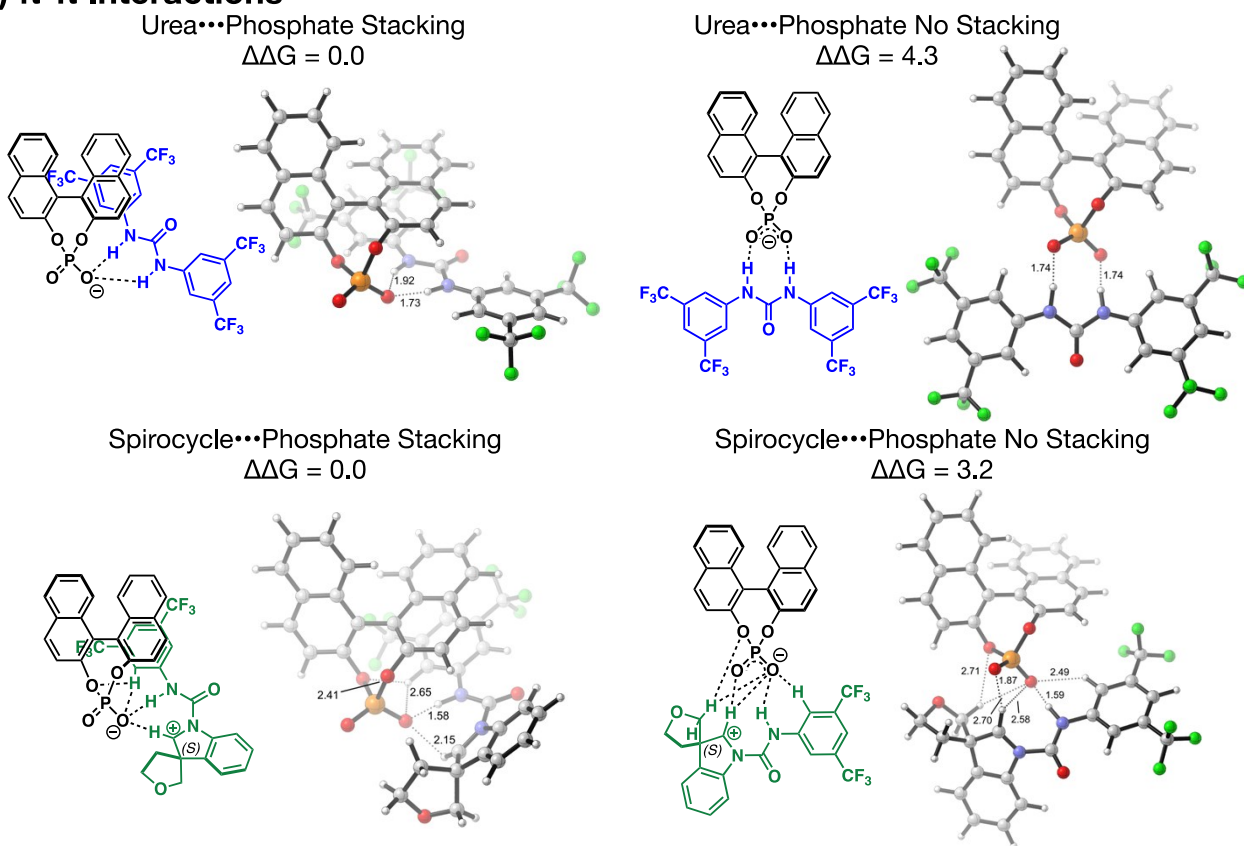

## B) Phosphate/Urea/Substrate Interactions

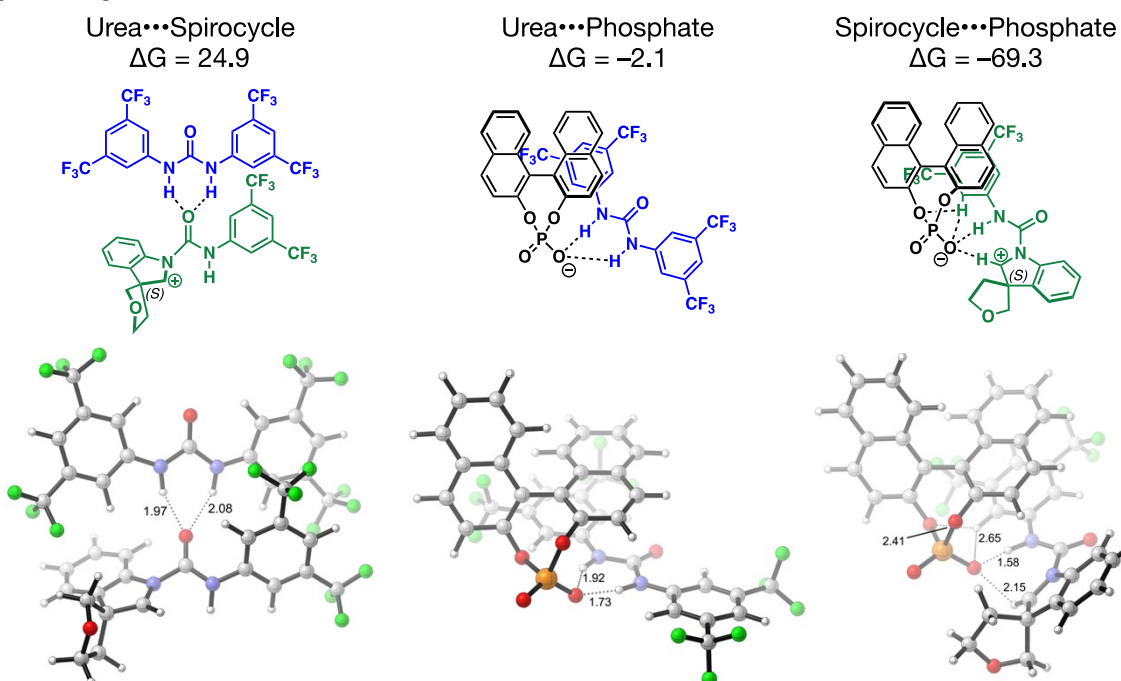

**Figure S1.** Model systems for the assembly of the catalyst, co-catalyst, and substrate. Energies reported in kcal/mol at PBE-D3BJ/6-31G(d)/SMD(Toluene). Distances are in Ångströms.

### Rationalizing Transition State Motifs

The computed reaction coordinate diagram involving the CPA mediated process shown in Figure S2 reveals a low-energy phosphate-acetal analogous to that observed by List and co-workers.<sup>15</sup> We hypothesized that the spirocyclization transition state conformations are closely related to the phosphate-acetal conformations, as the size and bulkiness of the CPA and the short life-time of the oxo-carbenium ion preceding the transition state would not allow for drastic structural reorganization.

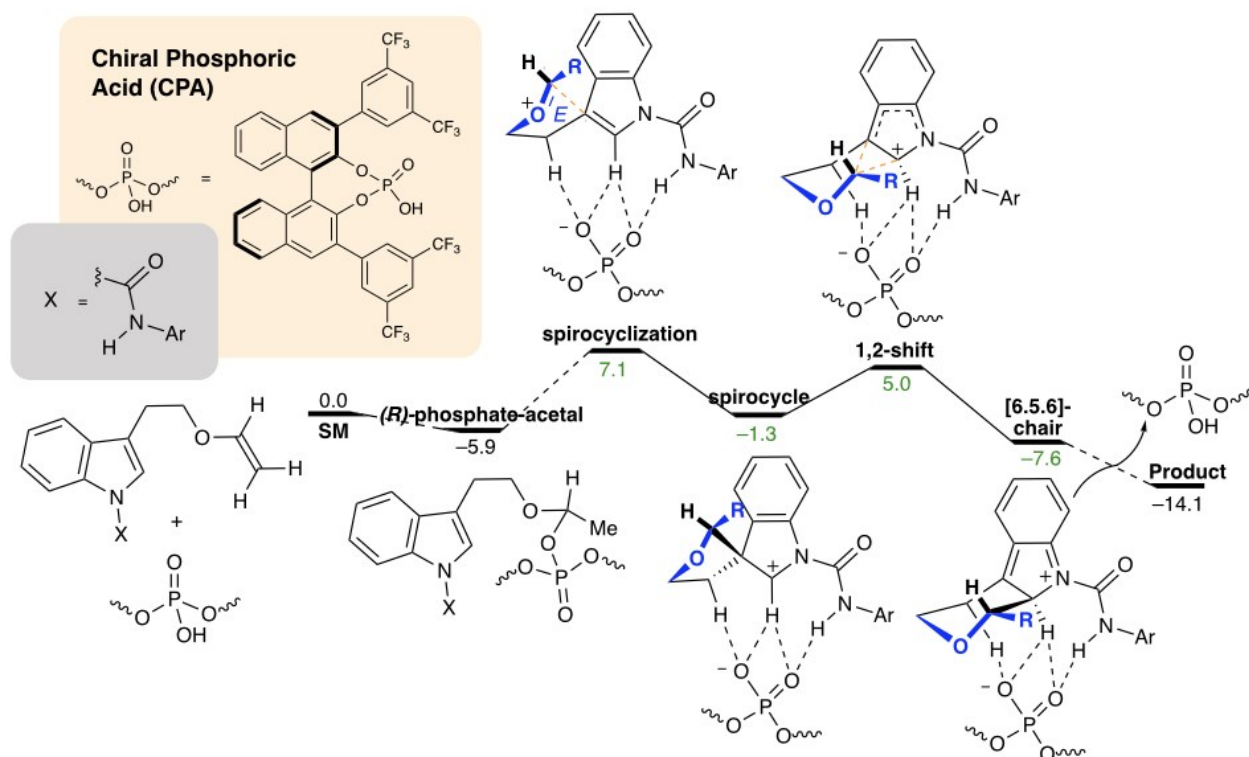

**Figure S2.** Reaction coordinate diagram of CPA-mediated process. Energies reported in kcal/mol at PBE-D3BJ/6-311++G(2df,p)//PBE-D3BJ/3-21G(d) with PBE-D3BJ/6-31+G(d,p)/SMD(Toluene) solvation corrections.

We performed a manual conformational search of both the *(R)*- and *(S)*-phosphate-acetal intermediates and optimized the structures using quantum mechanics. Three observations appear important: (1) The acetal favors stacking arrangements between the CPA aryl substituent and the top  $\pi$ -face of the substrate (Figure S3, top). (2) This is favored by 0.9 kcal/mol compared to the conformation in which the CPA aryl is in close proximity to the bottom face of the substrate (Figure S3, middle). (3) We also explored the torsions around the substrate carboxamide and

discovered that the *syn*-orientation between the carbonyl and the indole benzene group is favored over the *anti*-orientation (Figure S3, top vs. bottom) by 8.1 kcal/mol.

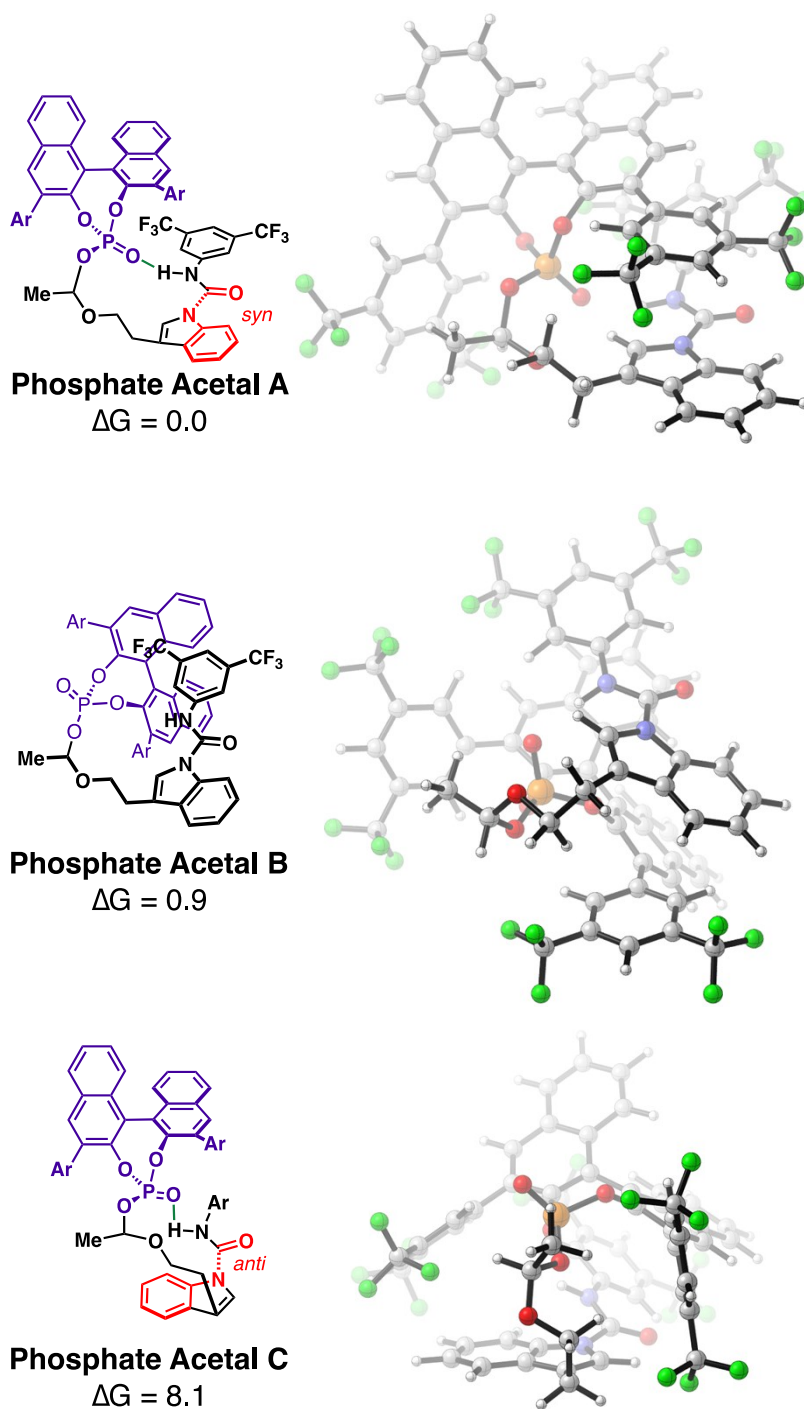

**Figure S3.** Three representative phosphate acetal conformations. Energies reported in kcal/mol at PBE/def2-TZVPP//PBE-D3BJ/6-31G(d)/SMD(toluene) with PBE-D3BJ/6-311++G(2df,p)/SMD(toluene) solvation corrections.



In order to deduce the binding motif of the urea to the CPA-mediated spirocyclization transition state, we coordinated the urea to the two exposed oxygens of the system: (1) the substrate carbonyl oxygen or (2) one of the CPA phosphate oxygens. Spirocyclization transition states involving the urea coordination to the substrate carbonyl oxygen was 5.6 kcal/mol disfavored compared to the transition state where the urea coordinates to the exposed CPA phosphate oxygen (Figure S4).

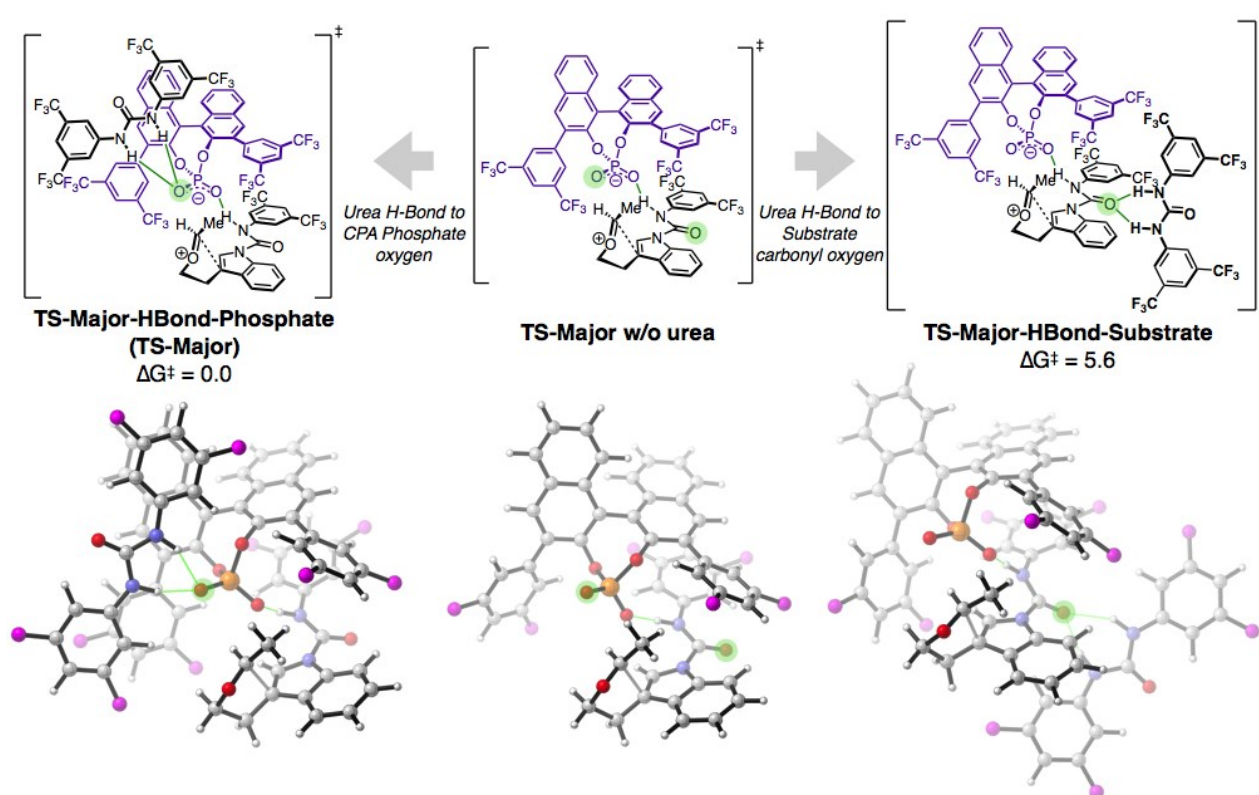

**Figure S4.** The two binding motifs of urea to the spirocyclization transition state. Energies reported in kcal/mol at PBE/def2-TZVPP//PBE-D3BJ/6-31G(d)/SMD(toluene) with PBE-D3BJ/6-311++G(2df,p)/SMD(toluene) solvation corrections.

### Origins of Stereoselectivity Model System

The origins of stereoselectivity involve the differential interactions between the substrate aryl group and the CPA naphthyl & aryl groups found in the major and minor transition states. To probe these interactions, we computed model systems involving these groups in the exact geometry as found in the transition states. The model complex from the **Major-TS** was favored by 4.6 kcal/mol over that from the **Minor-TS**.

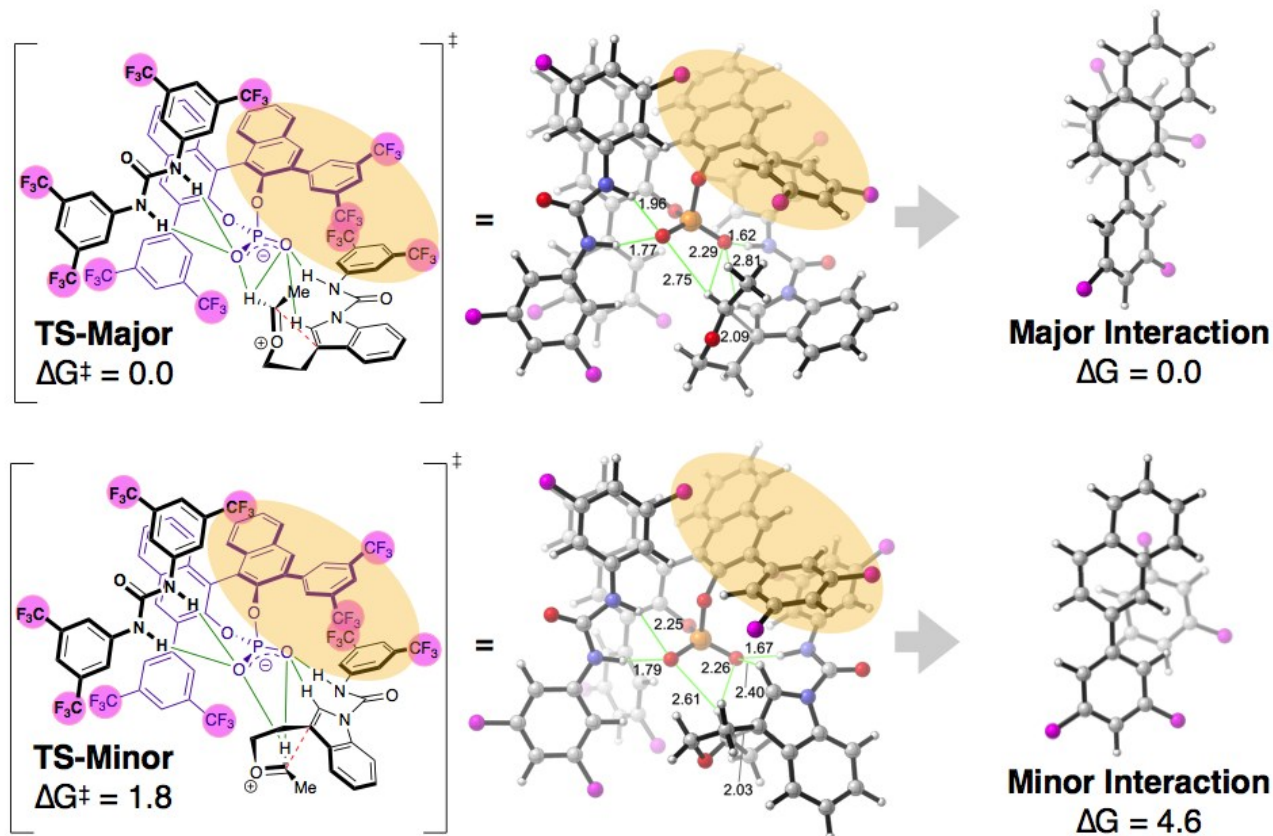

**Figure S5.** Two model complexes of substrate aryl group and the CPA naphthyl & aryl groups as found in the **Major-TS** and **Minor-TS**. The geometries of all atoms are as found in the transition states, except for the capping hydrogen atoms, which were quantum mechanically optimized. Energies reported in kcal/mol at PBE/def2-TZVPP//PBE-D3BJ/6-31G(d)/SMD(toluene) with PBE-D3BJ/6-311++G(2df,p)/SMD(toluene) solvation corrections. Distances are in Ångströms.



## Computed Geometries, Energies, and Thermal & Dispersion & Solvation Corrections

### Major-TS

Using Gaussian 09: AM64L-G09RevD.01 24-Apr-2013

```
#pbepbe/6-31G(d)/auto EmpiricalDispersion=GD3BJ
scf=(maxcycle=300,direct,tight) density=current
opt=(maxcycle=250,modredundant) iop(1/8=18) Temperature=233.15
SCRFF=(SMD,SOLVENT=Toluene)
Modredundant Input: B   7   11 F
Modredundant Input:
--link 1--
#pbepbe/6-31G(d)/auto EmpiricalDispersion=GD3BJ
scf=(direct,tight,maxcycle=300,xqc)
opt=(nofreeze,maxcycle=250,ts,calcfc,noeigentest) iop(1/8=18) freq=norman
Temperature=233.15 geom=check guess=read SCRFF=(SMD,SOLVENT=Toluene)
#P Geom=AllCheck Guess=TCheck SCRFF=Check Test GenChk RPBEPBE/6-31G(d)/Auto
Freq
```

Pointgroup= C1 Stoichiometry= C74H41F30N4O7P C1[X(C74H41F30N4O7P)] #Atoms= 157  
Charge = 0 Multiplicity = 1

SCF Energy= -6920.22890162 Predicted Change= -1.481149D-08

```
Optimization completed.      {Found      2      times}
Item  Max Val.  Criteria  Pass?  RMS Val.  Criteria  Pass?
Force  0.00003 || 0.00045 [ YES ]   0.00000 || 0.00030 [ YES ]
Displ  0.00360 || 0.00180 [ NO ]   0.00360 || 0.00180 [ YES ]
```

| Atomic Type | Coordinates (Angstroms) |           |           |
|-------------|-------------------------|-----------|-----------|
|             | X                       | Y         | Z         |
| C           | -3.335358               | -4.902524 | -0.881305 |
| C           | -4.620895               | -4.969170 | -1.427032 |
| C           | -4.773432               | -5.760836 | -2.572443 |
| C           | -3.684084               | -6.453312 | -3.140417 |
| C           | -2.400296               | -6.369142 | -2.584145 |
| C           | -2.221072               | -5.580177 | -1.438824 |
| C           | -1.026423               | -5.194652 | -0.667392 |
| C           | 0.234091                | -6.038624 | -0.543625 |
| C           | 1.412104                | -5.303670 | -1.226213 |
| O           | 0.814727                | -4.625293 | -2.352288 |
| C           | -0.109031               | -3.766965 | -1.892940 |
| C           | -1.529799               | -4.365194 | 0.377742  |
| N           | -2.857322               | -4.157320 | 0.228590  |
| C           | -3.704903               | -3.325626 | 1.094124  |
| N           | -3.000131               | -2.269141 | 1.571892  |
| C           | -3.510770               | -1.247416 | 2.407330  |
| O           | -4.868808               | -3.644510 | 1.300008  |
| C           | -4.838402               | -0.795444 | 2.345682  |
| C           | -5.206491               | 0.332670  | 3.092206  |
| C           | -6.600490               | 0.874593  | 2.904881  |
| F           | -7.545940               | -0.081566 | 3.102176  |
| F           | -6.875583               | 1.910858  | 3.735990  |

|   |           |           |           |
|---|-----------|-----------|-----------|
| F | -6.780337 | 1.335023  | 1.621726  |
| C | -4.290038 | 0.992915  | 3.921975  |
| C | -2.980580 | 0.503420  | 4.002866  |
| C | -1.955801 | 1.144588  | 4.904598  |
| F | -1.548470 | 0.278733  | 5.877419  |
| F | -0.832885 | 1.498556  | 4.212228  |
| F | -2.425821 | 2.257684  | 5.521551  |
| C | -2.586974 | -0.607560 | 3.249061  |
| C | -1.031236 | -3.182327 | -2.897381 |
| H | 0.207587  | -3.111250 | -1.071258 |
| H | 1.865867  | -4.565018 | -0.544517 |
| H | 2.190690  | -5.970898 | -1.618036 |
| H | -1.365009 | -3.918846 | -3.642267 |
| H | -0.501052 | -2.359846 | -3.414405 |
| H | -1.892209 | -2.727976 | -2.385438 |
| H | -5.458744 | -4.435704 | -0.978371 |
| H | -5.763041 | -5.839124 | -3.032467 |
| H | -3.844405 | -7.065292 | -4.033271 |
| H | -1.555862 | -6.897191 | -3.038634 |
| H | 0.481486  | -6.237554 | 0.511526  |
| H | 0.059152  | -7.008693 | -1.036764 |
| H | -0.986941 | -3.928160 | 1.214523  |
| H | -2.152651 | -1.979037 | 1.015377  |
| H | -5.557661 | -1.294269 | 1.692727  |
| H | -4.586091 | 1.881410  | 4.481706  |
| H | -1.564054 | -0.989721 | 3.311220  |
| C | -3.738065 | 3.311787  | 1.158061  |
| C | -4.151166 | 2.497448  | 0.073461  |
| C | -3.256211 | 1.699215  | -0.628492 |
| C | -3.751137 | 0.715109  | -1.622651 |
| C | -1.873193 | 1.775150  | -0.270141 |
| O | -0.970934 | 1.013648  | -1.012319 |
| C | -1.393917 | 2.592437  | 0.755267  |
| C | 0.054483  | 2.597490  | 1.112855  |
| C | -2.348156 | 3.340965  | 1.536906  |
| C | 0.682798  | 1.389158  | 1.415912  |
| O | -0.046329 | 0.215120  | 1.230428  |
| P | -0.250015 | -0.327731 | -0.329692 |
| C | 2.014172  | 1.293345  | 1.940399  |
| C | 2.635789  | -0.007405 | 2.301572  |
| C | 2.713329  | 2.489159  | 2.089039  |
| C | 2.172769  | 3.740540  | 1.695149  |
| C | 0.823969  | 3.810914  | 1.193396  |
| C | -1.990101 | 4.061773  | 2.712341  |
| C | -2.945019 | 4.743879  | 3.449976  |
| C | -4.306589 | 4.744425  | 3.052652  |
| C | -4.694263 | 4.034512  | 1.929733  |
| C | 2.954652  | 4.930448  | 1.763631  |
| C | 2.440551  | 6.141229  | 1.335093  |
| C | 1.118591  | 6.206122  | 0.824328  |
| C | 0.325923  | 5.071201  | 0.757932  |
| C | -3.083099 | 0.453524  | -2.836923 |
| C | -3.546430 | -0.547946 | -3.697494 |
| C | -2.821529 | -0.821056 | -4.991356 |
| F | -1.518901 | -0.424269 | -4.941805 |
| F | -3.395010 | -0.179131 | -6.045414 |

|   |           |           |           |
|---|-----------|-----------|-----------|
| F | -2.826554 | -2.153780 | -5.292038 |
| C | -4.693451 | -1.294580 | -3.388848 |
| C | -5.383297 | -1.007337 | -2.206083 |
| C | -6.649399 | -1.747956 | -1.860007 |
| F | -6.663923 | -2.139031 | -0.548699 |
| F | -6.812756 | -2.872393 | -2.612826 |
| F | -7.753418 | -0.975121 | -2.046631 |
| C | -4.916985 | -0.018382 | -1.328373 |
| C | 1.860017  | -1.126981 | 2.672650  |
| C | 2.456207  | -2.361496 | 2.947049  |
| C | 1.579661  | -3.566666 | 3.145119  |
| F | 1.454828  | -4.282588 | 1.969449  |
| F | 0.306043  | -3.235916 | 3.512961  |
| F | 2.066467  | -4.430291 | 4.066883  |
| C | 3.848198  | -2.509623 | 2.935396  |
| C | 4.630839  | -1.390877 | 2.621470  |
| C | 6.134134  | -1.513280 | 2.688398  |
| F | 6.764691  | -0.604438 | 1.900813  |
| F | 6.555317  | -2.754578 | 2.311000  |
| F | 6.585094  | -1.318764 | 3.961668  |
| C | 4.038890  | -0.167672 | 2.279972  |
| O | -1.186280 | -1.514685 | -0.201643 |
| O | 1.040587  | -0.495659 | -1.109290 |
| H | -5.212699 | 2.477957  | -0.191592 |
| H | 3.721173  | 2.480092  | 2.517152  |
| H | -0.953261 | 4.048691  | 3.052064  |
| H | -2.644376 | 5.276183  | 4.357926  |
| H | -5.049493 | 5.287312  | 3.645637  |
| H | -5.747190 | 3.987013  | 1.632748  |
| H | 3.981401  | 4.859958  | 2.139147  |
| H | 3.057815  | 7.044118  | 1.362447  |
| H | 0.732723  | 7.158550  | 0.448724  |
| H | -0.673744 | 5.127826  | 0.321530  |
| H | -2.198588 | 1.030737  | -3.107468 |
| H | -5.034925 | -2.093675 | -4.050817 |
| H | -5.448919 | 0.169123  | -0.391177 |
| H | 0.778341  | -1.037806 | 2.732685  |
| H | 4.313962  | -3.474818 | 3.146366  |
| H | 4.681483  | 0.658661  | 1.966213  |
| C | 3.728910  | 1.549118  | -1.589915 |
| N | 3.724015  | 0.205973  | -1.221763 |
| H | 2.790932  | -0.218248 | -1.087994 |
| C | 4.799572  | -0.666789 | -1.114787 |
| N | 2.419327  | 1.985653  | -1.775266 |
| H | 1.689599  | 1.261423  | -1.693989 |
| C | 1.974899  | 3.263383  | -2.106869 |
| C | 6.149821  | -0.291209 | -1.277104 |
| H | 6.393717  | 0.747082  | -1.503799 |
| C | 7.150243  | -1.259353 | -1.133535 |
| C | 8.594353  | -0.829815 | -1.180389 |
| F | 8.781618  | 0.273798  | -1.952149 |
| F | 9.400696  | -1.814009 | -1.669888 |
| F | 9.056465  | -0.527040 | 0.068439  |
| C | 6.854332  | -2.594498 | -0.827620 |
| H | 7.650554  | -3.329778 | -0.697801 |
| C | 5.510231  | -2.954156 | -0.661162 |

|   |           |           |           |
|---|-----------|-----------|-----------|
| C | 5.140024  | -4.376643 | -0.339624 |
| F | 4.104980  | -4.445053 | 0.559511  |
| F | 6.173763  | -5.078483 | 0.186109  |
| F | 4.713924  | -5.057208 | -1.449497 |
| C | 4.491905  | -2.008915 | -0.801078 |
| H | 3.445735  | -2.295620 | -0.654549 |
| C | 0.614633  | 3.386900  | -2.456817 |
| H | -0.013589 | 2.493495  | -2.474570 |
| C | 0.065258  | 4.638542  | -2.739134 |
| C | -1.418028 | 4.736630  | -2.975106 |
| F | -2.111481 | 4.825627  | -1.795734 |
| F | -1.909286 | 3.639776  | -3.623655 |
| F | -1.752901 | 5.829811  | -3.709675 |
| C | 0.852867  | 5.796112  | -2.689980 |
| H | 0.419005  | 6.777709  | -2.892303 |
| C | 2.205568  | 5.663379  | -2.344413 |
| C | 3.058374  | 6.903766  | -2.263005 |
| F | 2.345153  | 7.969837  | -1.789200 |
| F | 3.545815  | 7.273057  | -3.481923 |
| F | 4.128368  | 6.740561  | -1.438183 |
| C | 2.780522  | 4.419698  | -2.057180 |
| H | 3.828710  | 4.336144  | -1.771293 |
| O | 4.738854  | 2.248416  | -1.727609 |

-----  
Statistical Thermodynamic Analysis

Temperature= 233.150 Kelvin    Pressure= 1.00000 Atm

```

SCF Energy= -6920.22890162    Predicted Change= -1.481149D-08
Zero-point correction (ZPE)= -6919.2023    1.02654
Internal Energy (U)= -6919.1370    1.09186
Enthalpy (H)= -6919.1363    1.09260
Gibbs Free Energy (G)= -6919.3025    0.92634

```

-----  
Frequencies -- -199.7633    7.3824    8.8960

PBE-D3BJ/6-311++G(2df,p) = -6922.424226

PBE-D3BJ/6-311++G(2df,p)/SMD(Toluene) = -6922.472199

PBE/def2-TZVPP = -6921.71127898996

**Minor-TS**-----  
Using Gaussian 09: AM64L-G09RevD.01 24-Apr-2013

```

#pbepbe/6-31G(d)/auto EmpiricalDispersion=GD3BJ
scf=(maxcycle=300,direct,tight) density=current
opt=(maxcycle=250,modredundant) iop(1/8=18) Temperature=233.15
SCRFF=(SMD,SOLVENT=Toluene)
Modredundant Input: B    76    80 F
Modredundant Input:
--link 1--
#pbepbe/6-31G(d)/auto EmpiricalDispersion=GD3BJ
scf=(direct,tight,maxcycle=300,xqc)
opt=(nofreeze,maxcycle=250,ts,calcf, noeigentest) iop(1/8=18) freq=noraman
Temperature=233.15 geom=check guess=read SCRFF=(SMD,SOLVENT=Toluene)
#P Geom=AllCheck Guess=TCheck SCRFF=Check Test GenChk RPBEPBE/6-31G(d)/Auto

```

Freq

Pointgroup= C1 Stoichiometry= C74H41F30N4O7P C1[X(C74H41F30N4O7P)] #Atoms= 157  
 Charge = 0 Multiplicity = 1

SCF Energy= -6920.21944687 Predicted Change= -4.220356D-09

Optimization completed. {Found 3 times}  
 Item Max Val. Criteria Pass? RMS Val. Criteria Pass?  
 Force 0.00001 || 0.00045 [ YES ] 0.00000 || 0.00030 [ YES ]  
 Displ 0.00138 || 0.00180 [ YES ] 0.00138 || 0.00180 [ YES ]

| Atomic Type | Coordinates (Angstroms) |           |           |
|-------------|-------------------------|-----------|-----------|
|             | X                       | Y         | Z         |
| C           | 3.360549                | -3.378982 | 1.522752  |
| C           | 3.841983                | -2.541234 | 0.486507  |
| C           | 3.031591                | -1.614198 | -0.165287 |
| C           | 3.618129                | -0.725523 | -1.202838 |
| C           | 1.648168                | -1.583833 | 0.216376  |
| O           | 0.804049                | -0.693530 | -0.446861 |
| C           | 1.087476                | -2.472721 | 1.136122  |
| C           | -0.390832               | -2.534700 | 1.329456  |
| C           | 1.966165                | -3.339915 | 1.877445  |
| C           | -1.109920               | -1.390880 | 1.677192  |
| O           | -0.414588               | -0.183275 | 1.783729  |
| C           | -2.503576               | -1.407756 | 2.005713  |
| C           | -3.208070               | -0.235739 | 2.590684  |
| C           | -3.173055               | -2.619716 | 1.861768  |
| C           | -2.525034               | -3.795640 | 1.403851  |
| C           | -1.108649               | -3.771419 | 1.141266  |
| C           | 1.523032                | -4.144955 | 2.965029  |
| C           | 2.406042                | -4.971468 | 3.641002  |
| C           | 3.772573                | -5.038078 | 3.264739  |
| C           | 4.239928                | -4.250956 | 2.227968  |
| C           | -3.258755               | -4.997825 | 1.184535  |
| C           | -2.628118               | -6.137956 | 0.720146  |
| C           | -1.235519               | -6.111872 | 0.450751  |
| C           | -0.493295               | -4.959160 | 0.652169  |
| C           | 4.985647                | -0.377785 | -1.130758 |
| C           | 5.578484                | 0.442962  | -2.098127 |
| C           | 7.021049                | 0.864614  | -1.953547 |
| F           | 7.640697                | 0.951270  | -3.161365 |
| F           | 7.734867                | 0.006117  | -1.180808 |
| F           | 7.117509                | 2.100082  | -1.374520 |
| C           | 4.824853                | 0.964234  | -3.157000 |
| C           | 3.468386                | 0.624124  | -3.237645 |
| C           | 2.649990                | 1.193441  | -4.367565 |
| F           | 2.805900                | 2.551973  | -4.445817 |
| F           | 1.313222                | 0.960733  | -4.206513 |
| F           | 3.006785                | 0.687921  | -5.574823 |
| C           | 2.873063                | -0.218338 | -2.290780 |
| C           | -3.023668               | 1.086429  | 2.139859  |
| C           | -3.680851               | 2.151728  | 2.769370  |
| C           | -3.356830               | 3.564459  | 2.360298  |
| F           | -2.265322               | 4.035894  | 3.045355  |

|   |           |           |           |
|---|-----------|-----------|-----------|
| F | -4.374644 | 4.424115  | 2.608391  |
| F | -3.039748 | 3.664332  | 1.034012  |
| C | -4.560543 | 1.931442  | 3.835670  |
| C | -4.770549 | 0.616542  | 4.269526  |
| C | -5.758069 | 0.350007  | 5.378178  |
| F | -5.807676 | 1.379885  | 6.267640  |
| F | -5.449780 | -0.778348 | 6.074015  |
| F | -7.022033 | 0.184810  | 4.893307  |
| P | 0.012219  | 0.544094  | 0.356616  |
| O | -1.164535 | 0.840211  | -0.562142 |
| C | -4.095795 | -0.451336 | 3.665766  |
| O | 0.927715  | 1.683491  | 0.761319  |
| H | 4.892450  | -2.642699 | 0.196395  |
| H | -4.246111 | -2.667079 | 2.076926  |
| H | 0.476494  | -4.093714 | 3.274858  |
| H | 2.046188  | -5.573569 | 4.481396  |
| H | 4.456022  | -5.699503 | 3.806496  |
| H | 5.296945  | -4.270448 | 1.939961  |
| H | -4.336948 | -4.992811 | 1.378530  |
| H | -3.202254 | -7.049873 | 0.530360  |
| H | -0.748983 | -7.003708 | 0.044663  |
| H | 0.566525  | -4.945790 | 0.391354  |
| H | 5.597181  | -0.733132 | -0.299355 |
| H | 5.283241  | 1.625575  | -3.897691 |
| H | 1.819899  | -0.469575 | -2.400959 |
| H | -2.383270 | 1.288466  | 1.280951  |
| H | -5.066010 | 2.767378  | 4.324988  |
| H | -4.233657 | -1.462584 | 4.057516  |
| C | 2.958845  | 5.455772  | -0.965454 |
| C | 3.801248  | 6.488511  | -0.543294 |
| C | 3.428976  | 7.788085  | -0.912167 |
| C | 2.260727  | 8.036512  | -1.661368 |
| C | 1.422917  | 6.988741  | -2.067673 |
| C | 1.779926  | 5.679498  | -1.718630 |
| C | 1.106280  | 4.380305  | -1.903923 |
| C | 0.128638  | 4.090042  | -3.035282 |
| C | -1.298376 | 3.962182  | -2.439967 |
| O | -1.289872 | 4.801108  | -1.264075 |
| C | -0.307078 | 4.363511  | -0.452886 |
| H | -0.299969 | 3.279800  | -0.266557 |
| C | 2.014962  | 3.428468  | -1.347349 |
| N | 3.041110  | 4.054460  | -0.730972 |
| C | 4.063848  | 3.425471  | 0.116777  |
| N | 3.537242  | 2.392017  | 0.825402  |
| C | 4.226188  | 1.518471  | 1.690378  |
| O | 5.205482  | 3.866814  | 0.129165  |
| C | 3.435290  | 0.792340  | 2.602373  |
| C | 4.028208  | -0.162021 | 3.432429  |
| C | 3.176853  | -0.884933 | 4.448435  |
| F | 3.157860  | -0.219277 | 5.639717  |
| F | 3.647344  | -2.135116 | 4.700990  |
| F | 1.885377  | -1.000408 | 4.037818  |
| C | 5.400995  | -0.427775 | 3.351048  |
| C | 6.174706  | 0.302749  | 2.438572  |
| C | 7.611775  | -0.097937 | 2.223082  |
| F | 8.214099  | -0.490036 | 3.377534  |

|   |           |           |           |
|---|-----------|-----------|-----------|
| F | 8.356794  | 0.897276  | 1.682488  |
| F | 7.680951  | -1.165710 | 1.363083  |
| C | 5.611020  | 1.289270  | 1.618246  |
| C | 0.020267  | 5.239971  | 0.705149  |
| H | 0.400177  | 3.171224  | -3.575735 |
| H | 0.169651  | 4.923264  | -3.755576 |
| H | -2.094712 | 4.336477  | -3.096936 |
| H | -1.507980 | 2.918918  | -2.143500 |
| H | -0.756682 | 5.088034  | 1.476131  |
| H | 0.049631  | 6.304537  | 0.428737  |
| H | 0.980073  | 4.939600  | 1.154310  |
| H | 1.928483  | 2.344213  | -1.319232 |
| H | 4.709451  | 6.286916  | 0.027052  |
| H | 4.064779  | 8.626636  | -0.612730 |
| H | 2.005660  | 9.065542  | -1.931985 |
| H | 0.510364  | 7.186683  | -2.638830 |
| H | 2.507921  | 2.218496  | 0.790129  |
| H | 2.355831  | 0.961867  | 2.638693  |
| H | 5.856642  | -1.200941 | 3.974155  |
| H | 6.227443  | 1.839329  | 0.907090  |
| C | -3.475301 | -1.543524 | -1.807193 |
| N | -3.642628 | -0.252099 | -1.322132 |
| H | -2.787394 | 0.236715  | -1.007381 |
| C | -4.790012 | 0.535085  | -1.421596 |
| N | -2.131330 | -1.918883 | -1.756739 |
| H | -1.458862 | -1.196947 | -1.474962 |
| C | -1.586028 | -3.135720 | -2.171369 |
| C | -6.068934 | 0.028239  | -1.730190 |
| H | -6.194199 | -1.039217 | -1.912189 |
| C | -7.153770 | 0.910252  | -1.821974 |
| C | -8.521834 | 0.335367  | -2.094264 |
| F | -9.083449 | -0.172922 | -0.958736 |
| F | -8.474517 | -0.682176 | -2.997056 |
| F | -9.384019 | 1.271183  | -2.579167 |
| C | -7.005665 | 2.287335  | -1.617875 |
| H | -7.857964 | 2.963353  | -1.710799 |
| C | -5.729421 | 2.780531  | -1.308382 |
| C | -5.548724 | 4.255130  | -1.054176 |
| F | -4.284639 | 4.677325  | -1.347600 |
| F | -5.781284 | 4.578376  | 0.249477  |
| F | -6.407251 | 5.002924  | -1.802925 |
| C | -4.633534 | 1.921502  | -1.202221 |
| H | -3.646136 | 2.319729  | -0.956379 |
| C | -0.185162 | -3.206992 | -2.306612 |
| H | 0.417439  | -2.319235 | -2.108003 |
| C | 0.434282  | -4.406687 | -2.666479 |
| C | 1.937278  | -4.481193 | -2.664990 |
| F | 2.514306  | -3.293620 | -3.006921 |
| F | 2.407135  | -5.426037 | -3.521878 |
| F | 2.419017  | -4.803357 | -1.422713 |
| C | -0.319914 | -5.562276 | -2.902264 |
| H | 0.166551  | -6.505222 | -3.162273 |
| C | -1.712908 | -5.483339 | -2.763132 |
| C | -2.529256 | -6.734135 | -2.969696 |
| F | -2.705558 | -7.019953 | -4.290995 |
| F | -1.913449 | -7.822565 | -2.415138 |

|   |           |           |           |
|---|-----------|-----------|-----------|
| F | -3.764966 | -6.645770 | -2.409962 |
| C | -2.356558 | -4.293714 | -2.408464 |
| H | -3.437619 | -4.256643 | -2.285922 |
| O | -4.384816 | -2.266916 | -2.226519 |

-----  
Statistical Thermodynamic Analysis

Temperature= 233.150 Kelvin Pressure= 1.00000 Atm

=====

SCF Energy= -6920.21944687 Predicted Change= -4.220356D-09

Zero-point correction (ZPE)= -6919.1915 1.02793

Internal Energy (U)= -6919.1263 1.09310

Enthalpy (H)= -6919.1256 1.09384

Gibbs Free Energy (G)= -6919.2913 0.92807

-----  
Frequencies -- -254.2220 8.5187 9.4926

PBE-D3BJ/6-311++G(2df,p) = -6922.416415

PBE-D3BJ/6-311++G(2df,p)/SMD(Toluene) = -6922.464816

PBE/def2-TZVPP = -6921.70843617253

**Urea•••Phosphate Stacking/Urea•••Phosphate**-----  
Using Gaussian 09: AM64L-G09RevD.01 24-Apr-2013

=====

# pbepbe/6-31G\*/auto EmpiricalDispersion=GD3BJ gfpinput

scf=(direct,tight,maxcycle=300,xqc) opt=(verytight,maxcycle=250,gdiis)

freq=noraman iop(1/8=18) Temperature=233.15 SCRF=(SMD,SOLVENT=Toluene)

#N Geom=AllCheck Guess=TCheck SCRF=Check Test GenChk RPBE/PBE/6-31G(d)/Auto

Freq

-----  
Pointgroup= C1 Stoichiometry= C37H20F12N2O5P(1-) C1[X(C37H20F12N2O5P)] #Atoms= 77

Charge = -1 Multiplicity = 1

-----  
SCF Energy= -3444.05547806 Predicted Change= -1.295514D-12

=====

Optimization completed. {Found 1 times}

Item Max Val. Criteria Pass? RMS Val. Criteria Pass?

Force 0.00000 || 0.00000 [ YES ] 0.00000 || 0.00000 [ YES ]

Displ 0.00006 || 0.00000 [ NO ] 0.00006 || 0.00000 [ YES ]

-----  
Atomic Coordinates (Angstroms)  
Type X Y Z

|   |           |           |           |
|---|-----------|-----------|-----------|
| C | -5.000833 | -2.895170 | 0.829497  |
| C | -4.973632 | -3.271065 | -0.543564 |
| C | -3.832153 | -3.092453 | -1.297837 |
| C | -2.685063 | -2.492228 | -0.719065 |
| O | -1.611791 | -2.257944 | -1.552219 |
| C | -2.672137 | -2.035579 | 0.604401  |
| C | -1.468277 | -1.337992 | 1.127985  |
| C | -3.830456 | -2.293644 | 1.422609  |
| C | -0.214184 | -1.945831 | 0.996799  |
| O | -0.100103 | -3.159470 | 0.343065  |
| P | -0.136144 | -3.081847 | -1.345101 |



|   |           |           |           |
|---|-----------|-----------|-----------|
| C | 0.962907  | -1.370142 | 1.537262  |
| C | 0.905690  | -0.139040 | 2.159440  |
| C | -0.321930 | 0.579523  | 2.231622  |
| C | -1.526710 | -0.019202 | 1.709124  |
| C | -3.866474 | -1.996533 | 2.817175  |
| C | -5.001631 | -2.238402 | 3.574278  |
| C | -6.163130 | -2.794061 | 2.979392  |
| C | -6.153941 | -3.120717 | 1.634144  |
| C | -0.371155 | 1.903243  | 2.756088  |
| C | -1.549837 | 2.628148  | 2.754918  |
| C | -2.730935 | 2.048538  | 2.224654  |
| C | -2.721131 | 0.760108  | 1.717069  |
| O | -0.194547 | -4.486692 | -1.857370 |
| O | 0.868957  | -2.042805 | -1.845477 |
| H | -5.868934 | -3.719540 | -0.988525 |
| H | 1.815671  | 0.321698  | 2.559701  |
| H | -2.975420 | -1.577921 | 3.291504  |
| H | -4.998191 | -2.002497 | 4.643844  |
| H | -7.056557 | -2.975553 | 3.586163  |
| H | -7.035854 | -3.570318 | 1.162849  |
| H | 0.557256  | 2.346039  | 3.134668  |
| H | -1.568271 | 3.656328  | 3.129295  |
| H | -3.651521 | 2.638682  | 2.182289  |
| H | -3.625155 | 0.347532  | 1.264710  |
| C | 1.556590  | 1.140451  | -0.984109 |
| N | 2.433689  | 0.061017  | -1.038458 |
| H | 2.005557  | -0.854213 | -1.295148 |
| C | 3.758882  | 0.030982  | -0.629802 |
| N | 0.278253  | 0.739971  | -1.362805 |
| H | 0.180348  | -0.260482 | -1.621832 |
| C | -0.886996 | 1.502127  | -1.333365 |
| C | 4.493002  | 1.171449  | -0.233138 |
| H | 4.006890  | 2.146893  | -0.245033 |
| C | 5.826410  | 1.028566  | 0.170810  |
| C | 6.567141  | 2.243397  | 0.666811  |
| F | 6.154469  | 3.385758  | 0.052591  |
| F | 7.913052  | 2.139485  | 0.467933  |
| F | 6.386346  | 2.432721  | 2.008408  |
| C | 6.463560  | -0.218578 | 0.191540  |
| H | 7.503897  | -0.313474 | 0.509898  |
| C | 5.727649  | -1.345368 | -0.205389 |
| C | 6.411933  | -2.686755 | -0.253897 |
| F | 5.535765  | -3.719727 | -0.136451 |
| F | 7.335025  | -2.819302 | 0.743073  |
| F | 7.084351  | -2.868574 | -1.429315 |
| C | 4.395998  | -1.233259 | -0.611619 |
| H | 3.834323  | -2.122606 | -0.914886 |
| C | -2.080207 | 0.867267  | -1.741225 |
| H | -2.044764 | -0.173876 | -2.072620 |
| C | -3.297824 | 1.550291  | -1.689788 |
| C | -4.565690 | 0.797706  | -1.991970 |
| F | -5.053272 | 0.164499  | -0.878859 |
| F | -4.387101 | -0.164669 | -2.937390 |
| F | -5.559801 | 1.622566  | -2.432211 |
| C | -3.364783 | 2.881614  | -1.258211 |
| H | -4.319237 | 3.412163  | -1.221743 |

|   |           |           |           |
|---|-----------|-----------|-----------|
| C | -2.172188 | 3.509663  | -0.871043 |
| C | -2.244927 | 4.917980  | -0.344471 |
| F | -2.802523 | 4.965888  | 0.907193  |
| F | -3.027517 | 5.712744  | -1.134384 |
| F | -1.026676 | 5.512241  | -0.254019 |
| C | -0.941950 | 2.844065  | -0.894555 |
| H | -0.027654 | 3.339104  | -0.571178 |
| O | 1.867995  | 2.289796  | -0.642125 |
| H | -3.780194 | -3.390170 | -2.348666 |
| H | 1.903699  | -1.917358 | 1.428553  |

-----  
Statistical Thermodynamic Analysis

Temperature= 233.150 Kelvin Pressure= 1.00000 Atm

```

SCF Energy= -3444.05547806 Predicted Change= -1.295514D-12
Zero-point correction (ZPE)= -3443.5509 0.50450
Internal Energy (U)= -3443.5202 0.53518
Enthalpy (H)= -3443.5195 0.53592
Gibbs Free Energy (G)= -3443.6095 0.44597

```

-----  
Frequencies -- 4.9414 13.5685 18.5358**Urea•••Phosphate No Stacking**-----  
Using Gaussian 09: AM64L-G09RevD.01 24-Apr-2013

```

# pbepbe/6-31G*/auto EmpiricalDispersion=GD3BJ gfpint gfinput
scf=(direct,tight,maxcycle=300,xqc) opt=(maxcycle=250,gdiis) freq=noraman
iop(1/8=18) Temperature=233.15 SCRF=(SMD,SOLVENT=Toluene)
#N Geom=AllCheck Guess=TCheck SCRF=Check Test GenChk RPBEPBE/6-31G(d)/Auto
Freq

```

-----  
Pointgroup= C1 Stoichiometry= C37H20F12N2O5P(1-) C1[X(C37H20F12N2O5P)] #Atoms= 77  
Charge = -1 Multiplicity = 1-----  
SCF Energy= -3444.04847692 Predicted Change= -6.451807D-09

```

Optimization completed. {Found 1 times}
Item Max Val. Criteria Pass? RMS Val. Criteria Pass?
Force 0.00000 || 0.00045 [ YES ] 0.00000 || 0.00030 [ YES ]
Displ 0.00180 || 0.00180 [ YES ] 0.00180 || 0.00180 [ YES ]

```

-----  
Atomic Coordinates (Angstroms)  
Type X Y Z

|   |          |           |           |
|---|----------|-----------|-----------|
| C | 5.008987 | -3.390678 | -0.890500 |
| C | 3.837688 | -3.998846 | -0.355951 |
| C | 2.862210 | -3.235269 | 0.253361  |
| C | 3.046043 | -1.836038 | 0.387226  |
| O | 2.065424 | -1.116998 | 1.048375  |
| C | 4.192725 | -1.181367 | -0.078426 |
| C | 4.307411 | 0.290618  | 0.107534  |
| C | 5.182692 | -1.961572 | -0.777326 |
| C | 3.257999 | 1.110645  | -0.325077 |

|   |           |           |           |
|---|-----------|-----------|-----------|
| O | 2.144412  | 0.543464  | -0.921268 |
| P | 1.032485  | -0.186455 | 0.106844  |
| C | 3.303815  | 2.523159  | -0.217487 |
| C | 4.407325  | 3.131228  | 0.347122  |
| C | 5.484035  | 2.353547  | 0.860486  |
| C | 5.429893  | 0.913983  | 0.761731  |
| C | 6.321804  | -1.375447 | -1.405317 |
| C | 7.260011  | -2.154960 | -2.062770 |
| C | 7.108403  | -3.563487 | -2.134346 |
| C | 5.998501  | -4.162782 | -1.564147 |
| C | 6.601125  | 2.968085  | 1.495809  |
| C | 7.620298  | 2.207829  | 2.043348  |
| C | 7.549348  | 0.792247  | 1.985244  |
| C | 6.482745  | 0.162971  | 1.363705  |
| O | 0.159395  | -1.054712 | -0.781887 |
| O | 0.410314  | 0.824372  | 1.054401  |
| H | 3.708717  | -5.082058 | -0.459281 |
| H | 4.452785  | 4.222776  | 0.431596  |
| H | 6.445687  | -0.290290 | -1.369885 |
| H | 8.123173  | -1.676314 | -2.537581 |
| H | 7.858705  | -4.169660 | -2.652800 |
| H | 5.853480  | -5.247386 | -1.631549 |
| H | 6.628321  | 4.062574  | 1.553371  |
| H | 8.470602  | 2.693702  | 2.533317  |
| H | 8.340406  | 0.188833  | 2.443338  |
| H | 6.434057  | -0.928567 | 1.339085  |
| H | 1.936334  | -3.679364 | 0.630335  |
| H | 2.453784  | 3.106752  | -0.582400 |
| C | -3.146819 | 0.338029  | 0.109334  |
| N | -2.503614 | -0.890592 | 0.007568  |
| C | -3.063835 | -2.159007 | 0.080488  |
| N | -2.203319 | 1.351579  | 0.243715  |
| C | -2.383177 | 2.717191  | 0.070574  |
| C | -4.439209 | -2.418694 | 0.271388  |
| C | -4.881360 | -3.745017 | 0.359901  |
| C | -6.336638 | -4.014980 | 0.637666  |
| F | -7.146913 | -3.020136 | 0.184737  |
| F | -6.581078 | -4.141999 | 1.977164  |
| F | -6.759532 | -5.176583 | 0.057339  |
| C | -3.998673 | -4.830545 | 0.262993  |
| C | -2.636329 | -4.559631 | 0.069800  |
| C | -1.651788 | -5.687639 | -0.089336 |
| F | -2.114233 | -6.854603 | 0.443780  |
| F | -0.459512 | -5.413656 | 0.517928  |
| F | -1.370319 | -5.939416 | -1.401113 |
| C | -2.167142 | -3.248148 | -0.026350 |
| C | -1.222327 | 3.519733  | 0.159430  |
| C | -1.299533 | 4.898722  | -0.047887 |
| C | -0.023175 | 5.692956  | 0.034155  |
| F | 0.907700  | 5.241920  | -0.865067 |
| F | 0.559658  | 5.600411  | 1.262730  |
| F | -0.211902 | 7.016667  | -0.223216 |
| C | -2.521674 | 5.521391  | -0.336159 |
| C | -3.671214 | 4.719953  | -0.406480 |
| C | -4.982974 | 5.359576  | -0.778558 |
| F | -6.050995 | 4.692409  | -0.262326 |

|   |           |           |           |
|---|-----------|-----------|-----------|
| F | -5.161513 | 5.397550  | -2.133698 |
| F | -5.064151 | 6.651189  | -0.342501 |
| C | -3.623384 | 3.334164  | -0.208704 |
| O | -4.375218 | 0.506974  | 0.082417  |
| H | -1.485142 | -0.883326 | -0.237643 |
| H | -1.229752 | 1.076293  | 0.514415  |
| H | -5.137122 | -1.583325 | 0.336932  |
| H | -4.362356 | -5.857603 | 0.334975  |
| H | -1.102825 | -3.042134 | -0.182023 |
| H | -0.266106 | 3.037582  | 0.390935  |
| H | -2.579390 | 6.599673  | -0.495168 |
| H | -4.524439 | 2.721649  | -0.258580 |

-----  
Statistical Thermodynamic Analysis

Temperature= 233.150 Kelvin    Pressure= 1.00000 Atm

```

SCF Energy= -3444.04847692    Predicted Change= -6.451807D-09
Zero-point correction (ZPE)= -3443.5446    0.50386
Internal Energy (U)= -3443.5134    0.53501
Enthalpy (H)= -3443.5127    0.53575
Gibbs Free Energy (G)= -3443.6061    0.44233

```

-----  
Frequencies --    10.0287            12.4657            16.7771**Spirocycle•••Phosphate Stacking/Spirocycle•••Phosphate**-----  
Using Gaussian 09: AM64L-G09RevD.01 24-Apr-2013

```

# pbepbe/6-31G*/auto EmpiricalDispersion=GD3BJ gffprint gffinput
scf=(direct,tight,maxcycle=300,xqc) opt=(maxcycle=250) freq=noraman
iop(1/8=18) Temperature=233.15 SCRF=(SMD,SOLVENT=Toluene)
#N Geom=AllCheck Guess=TCheck SCRF=Check Test GenChk RPBEPBE/6-31G(d)/Auto
Freq

```

-----  
Pointgroup= C1    Stoichiometry= C40H27F6N2O6P    C1[X(C40H27F6N2O6P)]    #Atoms= 82  
Charge = 0            Multiplicity = 1-----  
SCF Energy= -3038.88488633    Predicted Change= -2.177641D-08

```

Optimization completed.    {Found    2    times}
Item    Max Val.    Criteria    Pass?    RMS Val.    Criteria    Pass?
Force    0.00001 || 0.00045    [ YES ]    0.00000 || 0.00030    [ YES ]
Displ    0.00126 || 0.00180    [ YES ]    0.00126 || 0.00180    [ YES ]

```

| Atomic Type | Coordinates (Angstroms) |           |           |
|-------------|-------------------------|-----------|-----------|
|             | X                       | Y         | Z         |
| C           | -4.481937               | 0.996877  | -0.904431 |
| C           | -4.477222               | 1.893197  | -1.974890 |
| C           | -5.429507               | 1.667334  | -2.981209 |
| C           | -6.328771               | 0.589004  | -2.910311 |
| C           | -6.303144               | -0.306391 | -1.827740 |
| C           | -5.369631               | -0.092679 | -0.812927 |
| C           | -5.051981               | -0.868330 | 0.438134  |
| C           | -4.602812               | -2.351962 | 0.196542  |

|   |           |           |           |
|---|-----------|-----------|-----------|
| C | -4.827943 | -3.022359 | 1.563536  |
| O | -5.626713 | -2.105654 | 2.355000  |
| C | -6.179809 | -1.143562 | 1.488628  |
| C | -3.962981 | -0.056071 | 1.041135  |
| N | -3.633488 | 0.955899  | 0.255456  |
| C | -2.522773 | 1.928302  | 0.470308  |
| N | -1.475792 | 1.321565  | 1.061644  |
| C | -0.195839 | 1.880186  | 1.252979  |
| O | -2.663800 | 3.076592  | 0.064191  |
| C | 0.191905  | 3.131331  | 0.743779  |
| C | 1.522972  | 3.540383  | 0.890048  |
| C | 1.933926  | 4.885473  | 0.347418  |
| F | 1.739852  | 5.879185  | 1.262591  |
| F | 3.251182  | 4.915728  | 0.004875  |
| F | 1.216381  | 5.226876  | -0.760066 |
| C | 2.466515  | 2.737733  | 1.543601  |
| C | 2.057046  | 1.503577  | 2.064733  |
| C | 3.062007  | 0.578994  | 2.705629  |
| F | 2.526242  | -0.094798 | 3.758339  |
| F | 3.513827  | -0.361508 | 1.825466  |
| F | 4.154317  | 1.252461  | 3.160595  |
| C | 0.736421  | 1.067904  | 1.925843  |
| H | -5.271702 | -2.760338 | -0.578973 |
| H | -3.885119 | -3.199409 | 2.104258  |
| H | -5.360991 | -3.984739 | 1.447090  |
| H | -7.070197 | -1.508171 | 0.931948  |
| H | -6.468328 | -0.259863 | 2.081470  |
| H | -3.566660 | -2.431516 | -0.160093 |
| H | -3.502503 | -0.214572 | 2.013507  |
| H | -3.784159 | 2.734360  | -2.012084 |
| H | -5.468843 | 2.349215  | -3.835643 |
| H | -7.060255 | 0.443744  | -3.710753 |
| H | -6.998393 | -1.150782 | -1.785063 |
| H | -1.517426 | 0.262696  | 1.214280  |
| H | -0.528355 | 3.755021  | 0.214770  |
| H | 3.504619  | 3.063226  | 1.636356  |
| H | 0.432804  | 0.088349  | 2.304569  |
| C | 1.134444  | 1.236715  | -2.141504 |
| C | -0.265538 | 1.039538  | -2.311987 |
| C | -0.877130 | -0.103848 | -1.834766 |
| C | -0.107147 | -1.110635 | -1.199694 |
| O | -0.778229 | -2.236417 | -0.746448 |
| C | 1.286734  | -1.023495 | -1.096331 |
| C | 2.052612  | -2.171739 | -0.543624 |
| C | 1.922777  | 0.201714  | -1.516494 |
| C | 1.698246  | -2.702479 | 0.699329  |
| O | 0.647809  | -2.145077 | 1.414989  |
| P | -0.923354 | -2.461309 | 0.918642  |
| C | 2.419618  | -3.753542 | 1.313755  |
| C | 3.504166  | -4.308884 | 0.665279  |
| C | 3.879168  | -3.862844 | -0.633906 |
| C | 3.136076  | -2.796662 | -1.262460 |
| C | 3.307920  | 0.458834  | -1.291891 |
| C | 3.887763  | 1.652527  | -1.690612 |
| C | 3.116179  | 2.655629  | -2.330912 |
| C | 1.764380  | 2.448909  | -2.544886 |

|   |           |           |           |
|---|-----------|-----------|-----------|
| C | 4.960772  | -4.468206 | -1.335721 |
| C | 5.293352  | -4.068596 | -2.618342 |
| C | 4.539003  | -3.050077 | -3.254390 |
| C | 3.488093  | -2.432127 | -2.595485 |
| O | -1.701239 | -1.276210 | 1.523630  |
| O | -1.379785 | -3.869147 | 1.143864  |
| H | -0.854613 | 1.819157  | -2.807840 |
| H | 4.076793  | -5.116228 | 1.134846  |
| H | 3.907986  | -0.290964 | -0.772841 |
| H | 4.950679  | 1.828223  | -1.494885 |
| H | 3.583553  | 3.599256  | -2.628417 |
| H | 1.148643  | 3.227983  | -3.008117 |
| H | 5.519075  | -5.270052 | -0.839020 |
| H | 6.124844  | -4.545504 | -3.147372 |
| H | 4.784205  | -2.752520 | -4.279371 |
| H | 2.909689  | -1.657833 | -3.104931 |
| H | 2.095657  | -4.097319 | 2.299632  |
| H | -1.953881 | -0.266250 | -1.941629 |

-----  
Statistical Thermodynamic Analysis

Temperature= 233.150 Kelvin    Pressure= 1.00000 Atm

```

=====
SCF Energy=   -3038.88488633   Predicted Change= -2.177641D-08
Zero-point correction (ZPE)=           -3038.2991   0.58577
Internal Energy (U)=           -3038.2703   0.61453
Enthalpy (H)=           -3038.2696   0.61527
Gibbs Free Energy (G)=           -3038.3539   0.53095
=====

```

```

-----
Frequencies --   11.2682           22.0906           27.8642
-----

```

**Spirocycle•••Phosphate No Stacking**-----  
Using Gaussian 09: AM64L-G09RevD.01 24-Apr-2013

```

=====
# pbepbe/6-31G*/auto EmpiricalDispersion=GD3BJ gfpinput gfinput
scf=(direct,tight,maxcycle=300,xqc) opt=(maxcycle=250) freq=norman
iop(1/8=18) Temperature=233.15 SCRF=(SMD,SOLVENT=Toluene)
#N Geom=AllCheck Guess=TCheck SCRF=Check Test GenChk RPBEPBE/6-31G(d)/Auto
Freq
=====

```

```

Pointgroup= C1  Stoichiometry= C40H27F6N2O6P  C1[X(C40H27F6N2O6P)] #Atoms= 82
Charge = 0      Multiplicity = 1
=====

```

```

SCF Energy= -3038.88002972   Predicted Change= -3.474348D-08
=====

```

```

Optimization completed.      {Found      1      times}
Item  Max Val.  Criteria  Pass?  RMS Val.  Criteria  Pass?
Force  0.00002 || 0.00045 [ YES ]   0.00000 || 0.00030 [ YES ]
Displ  0.00771 || 0.00180 [ NO ]   0.00771 || 0.00180 [ NO ]
=====

```

| Atomic Type | Coordinates (Angstroms) |          |           |
|-------------|-------------------------|----------|-----------|
|             | X                       | Y        | Z         |
| C           | -5.943085               | 1.498021 | -1.277439 |
| C           | -5.196082               | 2.685163 | -1.029906 |

|   |           |           |           |
|---|-----------|-----------|-----------|
| C | -3.922622 | 2.618622  | -0.500425 |
| C | -3.374933 | 1.358787  | -0.158525 |
| O | -2.104517 | 1.345054  | 0.404229  |
| C | -4.077870 | 0.160102  | -0.307532 |
| C | -3.449407 | -1.116151 | 0.128082  |
| C | -5.375509 | 0.215174  | -0.935337 |
| C | -2.174513 | -1.451411 | -0.337561 |
| O | -1.485475 | -0.592736 | -1.183358 |
| P | -0.843513 | 0.810501  | -0.549677 |
| C | -1.557619 | -2.689787 | -0.043711 |
| C | -2.192964 | -3.598513 | 0.777659  |
| C | -3.452904 | -3.284656 | 1.361095  |
| C | -4.086947 | -2.024472 | 1.050348  |
| C | -6.118092 | -0.955485 | -1.269563 |
| C | -7.364188 | -0.867933 | -1.869258 |
| C | -7.935926 | 0.394899  | -2.168919 |
| C | -7.231572 | 1.551605  | -1.882945 |
| C | -4.090835 | -4.183122 | 2.263515  |
| C | -5.294313 | -3.857916 | 2.864601  |
| C | -5.900446 | -2.604945 | 2.590919  |
| C | -5.312865 | -1.712393 | 1.708583  |
| O | -0.541049 | 1.702911  | -1.732710 |
| O | 0.255190  | 0.531414  | 0.487968  |
| H | -5.638929 | 3.652521  | -1.292197 |
| H | -1.716679 | -4.557144 | 1.007600  |
| H | -5.686777 | -1.936261 | -1.056075 |
| H | -7.909165 | -1.784355 | -2.118720 |
| H | -8.923267 | 0.450955  | -2.638821 |
| H | -7.649666 | 2.534710  | -2.128909 |
| H | -3.597632 | -5.137595 | 2.480210  |
| H | -5.771449 | -4.556582 | 3.559502  |
| H | -6.839150 | -2.336323 | 3.086756  |
| H | -5.785098 | -0.745610 | 1.517223  |
| H | -3.308274 | 3.507007  | -0.327864 |
| H | -0.586463 | -2.905245 | -0.493321 |
| C | 3.647799  | 1.383788  | -0.272361 |
| N | 2.914810  | 2.649908  | -0.002735 |
| N | 2.829093  | 0.315360  | -0.170795 |
| C | 3.243950  | -1.030263 | -0.256503 |
| C | 2.344000  | -2.002016 | 0.227207  |
| C | 2.712100  | -3.352120 | 0.210276  |
| C | 1.747662  | -4.394441 | 0.722237  |
| F | 0.890140  | -4.812435 | -0.260777 |
| F | 0.977799  | -3.922564 | 1.738126  |
| F | 2.392120  | -5.503295 | 1.173119  |
| C | 3.956019  | -3.756256 | -0.293511 |
| C | 4.834142  | -2.780503 | -0.780164 |
| C | 6.151806  | -3.203200 | -1.383365 |
| F | 7.094994  | -2.228323 | -1.279743 |
| F | 6.021310  | -3.491838 | -2.709505 |
| F | 6.647070  | -4.319961 | -0.782556 |
| C | 4.495943  | -1.422098 | -0.766579 |
| O | 4.850737  | 1.452107  | -0.498306 |
| C | 3.478383  | 3.709792  | 0.790395  |
| C | 2.521058  | 4.739234  | 0.846636  |
| C | 1.299268  | 4.306062  | 0.071369  |

|   |           |           |           |
|---|-----------|-----------|-----------|
| C | -0.002001 | 4.123001  | 1.007871  |
| H | -0.206839 | 3.076136  | 1.279725  |
| C | 0.749546  | 5.264221  | -1.036262 |
| H | 0.553810  | 4.692941  | -1.957148 |
| H | 1.461316  | 6.073286  | -1.260377 |
| H | 0.190732  | 4.718877  | 1.922999  |
| C | 1.720308  | 2.983396  | -0.456096 |
| C | 4.716335  | 3.774743  | 1.430193  |
| C | 4.982225  | 4.947192  | 2.155234  |
| C | 4.042626  | 5.989886  | 2.229643  |
| C | 2.799981  | 5.894033  | 1.579164  |
| H | 1.797622  | 0.457968  | 0.089692  |
| H | 1.376364  | -1.686161 | 0.630609  |
| H | 4.241929  | -4.810410 | -0.290091 |
| H | 5.200697  | -0.674130 | -1.128640 |
| H | 1.105689  | 2.357997  | -1.131377 |
| H | 5.445656  | 2.966613  | 1.356092  |
| H | 5.942773  | 5.046378  | 2.669144  |
| H | 4.282728  | 6.891727  | 2.800670  |
| H | 2.072400  | 6.709365  | 1.644713  |
| O | -1.087876 | 4.628062  | 0.273236  |
| C | -0.582916 | 5.756175  | -0.441944 |
| H | -1.327818 | 6.035978  | -1.202160 |
| H | -0.419347 | 6.616934  | 0.241481  |

-----  
Statistical Thermodynamic AnalysisTemperature= 233.150 Kelvin    Pressure= 1.00000 Atm  
=====

SCF Energy= -3038.88002972    Predicted Change= -3.474348D-08

Zero-point correction (ZPE)= -3038.2943    0.58566

Internal Energy (U)= -3038.2653    0.61464

Enthalpy (H)= -3038.2646    0.61538

Gibbs Free Energy (G)= -3038.3530    0.52698  
-----

Frequencies --    2.7265                    6.5216                    12.9262

**Urea•••Spirocycle**  
-----Using Gaussian 09: AM64L-G09RevD.01 24-Apr-2013  
=====

```
# pbepbe/6-31G*/auto EmpiricalDispersion=GD3BJ gfpint gfinput
scf=(direct,tight,maxcycle=300,xqc) opt=(maxcycle=250) freq=noraman
iop(1/8=18) Temperature=233.15 SCRF=(SMD,SOLVENT=Toluene)
#N Geom=AllCheck Guess=TCheck SCRF=Check Test GenChk RPBEPBE/6-31G(d)/Auto
Freq
```

-----  
Pointgroup= C1    Stoichiometry= C37H23F18N4O3(1+)    C1[X(C37H23F18N4O3)]    #Atoms= 85Charge = 1            Multiplicity = 1  
-----SCF Energy= -3661.81664142    Predicted Change= -4.372931D-07  
=====

```
Optimization completed.            {Found    1    times}
Item    Max Val.    Criteria    Pass?    RMS Val.    Criteria    Pass?
Force    0.00001 || 0.00045    [ YES ]    0.00000 || 0.00030    [ YES ]
Displ    0.07934 || 0.00180    [ NO ]    0.07934 || 0.00180    [ NO ]
```



| Atomic<br>Type | Coordinates (Angstroms) |           |           |
|----------------|-------------------------|-----------|-----------|
|                | X                       | Y         | Z         |
| C              | -3.005213               | -2.526831 | -1.413894 |
| C              | -2.841139               | -1.685981 | -2.518581 |
| C              | -3.996103               | -1.420489 | -3.267431 |
| C              | -5.240637               | -1.977759 | -2.918506 |
| C              | -5.373130               | -2.833018 | -1.812527 |
| C              | -4.235723               | -3.109722 | -1.053399 |
| C              | -4.042787               | -3.929446 | 0.195093  |
| C              | -4.525672               | -5.423385 | 0.193399  |
| C              | -5.290086               | -5.576450 | 1.536434  |
| O              | -4.884361               | -4.464539 | 2.350206  |
| C              | -4.832627               | -3.374929 | 1.483559  |
| C              | -2.599349               | -3.761463 | 0.456482  |
| N              | -2.035084               | -2.966526 | -0.448120 |
| C              | -0.691445               | -2.385987 | -0.349931 |
| N              | 0.234462                | -3.216919 | 0.173133  |
| C              | 1.541118                | -2.774519 | 0.551451  |
| O              | -0.530911               | -1.219975 | -0.704209 |
| C              | 2.653706                | -3.537309 | 0.180918  |
| C              | 3.931645                | -3.111880 | 0.574244  |
| C              | 5.123359                | -3.943754 | 0.151105  |
| F              | 5.091751                | -5.165303 | 0.755449  |
| F              | 6.298091                | -3.355246 | 0.465269  |
| F              | 5.104625                | -4.165970 | -1.190284 |
| C              | 4.098310                | -1.939905 | 1.317601  |
| C              | 2.969841                | -1.185141 | 1.672709  |
| C              | 3.152033                | 0.073354  | 2.494763  |
| F              | 3.322280                | -0.226326 | 3.810554  |
| F              | 2.072669                | 0.894673  | 2.400868  |
| F              | 4.244090                | 0.767256  | 2.091085  |
| C              | 1.687263                | -1.595320 | 1.300825  |
| H              | -5.044110               | -6.496230 | 2.086990  |
| H              | -6.382619               | -5.539998 | 1.361652  |
| H              | -5.827533               | -3.064980 | 1.105287  |
| H              | -4.348338               | -2.522488 | 1.983965  |
| H              | -3.672192               | -6.116092 | 0.123549  |
| H              | -5.171733               | -5.597254 | -0.680794 |
| H              | -2.046473               | -4.130039 | 1.323496  |
| H              | -1.878582               | -1.244494 | -2.780578 |
| H              | -3.924870               | -0.757947 | -4.134162 |
| H              | -6.122916               | -1.736170 | -3.517519 |
| H              | -6.345449               | -3.261738 | -1.552198 |
| H              | 0.044112                | -4.222159 | 0.192475  |
| H              | 2.534194                | -4.442328 | -0.422903 |
| H              | 5.098202                | -1.597209 | 1.590641  |
| H              | 0.817913                | -0.998551 | 1.584319  |
| C              | -3.629594               | 1.222842  | -0.104206 |
| C              | -2.554597               | 2.134906  | -0.121364 |
| N              | -1.282381               | 1.604152  | -0.348885 |
| C              | -2.814428               | 3.505470  | 0.088286  |
| C              | -4.131686               | 3.927333  | 0.303802  |
| C              | -4.408831               | 5.404625  | 0.465018  |
| F              | -3.346970               | 6.067689  | 0.990975  |

|   |           |           |           |
|---|-----------|-----------|-----------|
| F | -5.479090 | 5.627238  | 1.276089  |
| F | -4.692118 | 5.984926  | -0.735497 |
| C | -5.207407 | 3.027938  | 0.316889  |
| C | -4.936594 | 1.669512  | 0.111020  |
| C | -6.055443 | 0.663196  | 0.069076  |
| F | -5.666777 | -0.535964 | 0.620840  |
| F | -6.443982 | 0.381820  | -1.208505 |
| F | -7.155302 | 1.075636  | 0.741600  |
| C | -0.054944 | 2.269133  | -0.342640 |
| N | 0.987984  | 1.389724  | -0.629024 |
| C | 2.355950  | 1.676520  | -0.708977 |
| O | 0.085787  | 3.472084  | -0.113335 |
| C | 2.922549  | 2.915946  | -0.353257 |
| C | 4.311304  | 3.080488  | -0.434650 |
| C | 4.914404  | 4.427790  | -0.112221 |
| F | 4.141031  | 5.142411  | 0.746169  |
| F | 5.069558  | 5.181555  | -1.237188 |
| F | 6.146726  | 4.299959  | 0.452466  |
| C | 5.155147  | 2.044349  | -0.852396 |
| C | 4.578610  | 0.817131  | -1.208276 |
| C | 5.483833  | -0.317126 | -1.615265 |
| F | 6.279466  | -0.709252 | -0.574491 |
| F | 6.315585  | 0.035938  | -2.628599 |
| F | 4.789252  | -1.420528 | -2.019198 |
| C | 3.196637  | 0.630732  | -1.144537 |
| H | -3.440335 | 0.155302  | -0.256536 |
| H | -1.266032 | 0.595795  | -0.517634 |
| H | -1.988716 | 4.216900  | 0.091656  |
| H | -6.226645 | 3.376272  | 0.496581  |
| H | 0.745112  | 0.416809  | -0.828528 |
| H | 2.279039  | 3.727932  | -0.015546 |
| H | 6.237457  | 2.188095  | -0.898657 |
| H | 2.763922  | -0.332736 | -1.428689 |

-----  
Statistical Thermodynamic Analysis

Temperature= 233.150 Kelvin Pressure= 1.00000 Atm

-----  
SCF Energy= -3661.81664142 Predicted Change= -4.372931D-07

Zero-point correction (ZPE)= -3661.2566 0.55994

Internal Energy (U)= -3661.2208 0.59576

Enthalpy (H)= -3661.2201 0.59650

Gibbs Free Energy (G)= -3661.3225 0.49405

-----  
Frequencies -- 3.7583 14.9052 17.7685**Enol Ether**-----  
Using Gaussian 09: AM64L-G09RevD.01 24-Apr-2013-----  
#pbepbe/3-21G\*/auto gffprint gffinput scf=(direct,tight,maxcycle=300,xqc)

opt=(maxcycle=250,gdiis) iop(1/8=18) freq=noraman temp=233.15

#P Geom=AllCheck Guess=TCheck SCRF=Check Test GenChk RPBEPBE/3-21G\*/Auto

Freq  
-----

Pointgroup= C1 Stoichiometry= C21H16F6N2O2 C1[X(C21H16F6N2O2)] #Atoms= 47  
 Charge = 0 Multiplicity = 1

-----  
 SCF Energy= -1658.16082559 Predicted Change= -2.800242D-09  
 =====

Optimization completed. {Found 1 times}  
 Item Max Val. Criteria Pass? RMS Val. Criteria Pass?  
 Force 0.00000 || 0.00045 [ YES ] 0.00000 || 0.00030 [ YES ]  
 Displ 0.00188 || 0.00180 [ NO ] 0.00188 || 0.00180 [ YES ]  
 -----

| Atomic Type | Coordinates (Angstroms) |           |           |
|-------------|-------------------------|-----------|-----------|
|             | X                       | Y         | Z         |
| C           | -2.697984               | -1.697352 | -0.656148 |
| C           | -2.639334               | -3.094311 | -0.744659 |
| C           | -3.821661               | -3.790550 | -1.017237 |
| C           | -5.045993               | -3.106603 | -1.199124 |
| C           | -5.121227               | -1.712835 | -1.107963 |
| C           | -3.935394               | -1.007696 | -0.832727 |
| C           | -3.674026               | 0.417629  | -0.677487 |
| C           | -4.698845               | 1.515102  | -0.692252 |
| C           | -5.497877               | 1.518455  | 0.620775  |
| O           | -6.491528               | 2.596004  | 0.458301  |
| C           | -7.335813               | 2.801925  | 1.548067  |
| C           | -7.364123               | 2.146226  | 2.720222  |
| C           | -2.326098               | 0.557640  | -0.436683 |
| N           | -1.702557               | -0.720804 | -0.434965 |
| C           | -0.330430               | -1.023686 | -0.241988 |
| N           | 0.484835                | 0.085314  | -0.461450 |
| C           | 1.870482                | 0.134802  | -0.225166 |
| O           | 0.065800                | -2.165290 | 0.071506  |
| C           | 2.547773                | 1.338984  | -0.507922 |
| C           | 3.921032                | 1.457574  | -0.295818 |
| C           | 4.614406                | 2.716395  | -0.700203 |
| F           | 3.748793                | 3.799551  | -0.599547 |
| F           | 5.061477                | 2.670432  | -2.011532 |
| F           | 5.719282                | 2.941348  | 0.106115  |
| C           | 4.657970                | 0.390367  | 0.220379  |
| C           | 3.993642                | -0.803170 | 0.508880  |
| C           | 4.744129                | -1.934714 | 1.132661  |
| F           | 6.075797                | -1.898868 | 0.741797  |
| F           | 4.192929                | -3.150549 | 0.759304  |
| F           | 4.718764                | -1.875958 | 2.517539  |
| C           | 2.624293                | -0.943915 | 0.281459  |
| H           | -8.023450               | 3.621193  | 1.318991  |
| H           | -8.096296               | 2.436020  | 3.475113  |
| H           | -6.688948               | 1.325920  | 2.968695  |
| H           | -1.769757               | 1.455900  | -0.185831 |
| H           | -4.841526               | 1.728613  | 1.485322  |
| H           | -6.006320               | 0.550470  | 0.785446  |
| H           | -1.693098               | -3.605814 | -0.578409 |
| H           | -3.795521               | -4.881426 | -1.083529 |
| H           | -5.950841               | -3.682906 | -1.412013 |
| H           | -6.067614               | -1.184566 | -1.250520 |
| H           | -5.409883               | 1.376826  | -1.528116 |
| H           | -4.224429               | 2.505153  | -0.816145 |

|   |          |           |           |
|---|----------|-----------|-----------|
| H | 0.071741 | 0.897744  | -0.928369 |
| H | 2.005271 | 2.210847  | -0.882018 |
| H | 5.729843 | 0.486247  | 0.391821  |
| H | 2.127797 | -1.892725 | 0.470529  |

-----  
Statistical Thermodynamic Analysis

Temperature= 233.150 Kelvin Pressure= 1.00000 Atm

=====

SCF Energy= -1658.16082559 Predicted Change= -2.800242D-09

Zero-point correction (ZPE)= -1657.8214 0.33933

Internal Energy (U)= -1657.8037 0.35702

Enthalpy (H)= -1657.8030 0.35776

Gibbs Free Energy (G)= -1657.8649 0.29589

-----  
Frequencies -- 14.9572 15.8048 31.2806

PBE-D3BJ = -0.05881225

PBE/6-311++G(2df,p) = -1667.598396

PBE/6-31+G(d,p) = -1667.148819

PBE/6-31+G(d,p)/SMD(Toluene) = -1667.173333

**Chiral Phosphoric Acid (CPA)**-----  
Using Gaussian 09: AM64L-G09RevD.01 24-Apr-2013

=====

#pbepbe/3-21G\*/auto gffprint gffinput scf=(direct,tight,maxcycle=300,xqc)

opt=(maxcycle=250,gdii) iop(1/8=18) freq=noraman temp=233.15

#P Geom=AllCheck Guess=ICheck SCRF=Check Test GenChk RPBEPBE/3-21G\*/Auto

Freq

-----  
Pointgroup= C1 Stoichiometry= C36H17F12O4P C1[X(C36H17F12O4P)] #Atoms= 70

Charge = 0 Multiplicity = 1

-----  
SCF Energy= -3202.35639762 Predicted Change= -8.538624D-09

=====

Optimization completed. {Found 2 times}

Item Max Val. Criteria Pass? RMS Val. Criteria Pass?

Force 0.00001 || 0.00045 [ YES ] 0.00000 || 0.00030 [ YES ]

Displ 0.00158 || 0.00180 [ YES ] 0.00158 || 0.00180 [ YES ]

-----  
Atomic Coordinates (Angstroms)  
Type X Y Z

|   |           |           |           |
|---|-----------|-----------|-----------|
| C | -2.595699 | 3.292480  | 1.377522  |
| C | -3.427916 | 2.218785  | 0.955669  |
| C | -2.898777 | 1.156493  | 0.231580  |
| C | -3.775002 | 0.005743  | -0.119368 |
| C | -1.522416 | 1.174504  | -0.147988 |
| O | -0.999777 | 0.083210  | -0.895559 |
| P | -0.032311 | -0.999475 | -0.112063 |
| O | 0.539750  | -2.000000 | -1.049610 |
| C | -0.693556 | 2.234260  | 0.210595  |
| C | 0.729187  | 2.220809  | -0.243009 |
| C | -1.198709 | 3.303768  | 1.027912  |

|   |           |           |           |
|---|-----------|-----------|-----------|
| C | 1.525297  | 1.119513  | 0.066931  |
| O | 0.969627  | -0.007872 | 0.736563  |
| C | 2.914057  | 1.098217  | -0.269273 |
| C | 3.777117  | -0.063563 | 0.080104  |
| C | 3.478339  | 2.185715  | -0.927224 |
| C | 2.675428  | 3.290876  | -1.322969 |
| C | 1.273829  | 3.317113  | -0.996490 |
| C | -0.372992 | 4.345705  | 1.543583  |
| C | -0.916313 | 5.347684  | 2.331759  |
| C | -2.303990 | 5.359290  | 2.638783  |
| C | -3.129205 | 4.349487  | 2.175344  |
| C | 3.244265  | 4.371682  | -2.062470 |
| C | 2.448117  | 5.419409  | -2.491578 |
| C | 1.055737  | 5.425268  | -2.206104 |
| C | 0.478569  | 4.400441  | -1.473305 |
| C | -4.719588 | -0.462090 | 0.815553  |
| C | -5.601714 | -1.494563 | 0.480526  |
| C | -6.544307 | -2.019555 | 1.513392  |
| F | -5.982384 | -3.042606 | 2.262310  |
| F | -7.687363 | -2.525812 | 0.912152  |
| F | -6.903770 | -1.011470 | 2.398110  |
| C | -5.562398 | -2.080773 | -0.785183 |
| C | -4.614571 | -1.636082 | -1.709647 |
| C | -4.519416 | -2.304061 | -3.043516 |
| F | -5.772790 | -2.744441 | -3.448726 |
| F | -3.684726 | -3.410114 | -3.013573 |
| F | -4.016652 | -1.426940 | -3.991745 |
| C | -3.723142 | -0.607566 | -1.389257 |
| C | 3.673110  | -0.712215 | 1.327966  |
| C | 4.558483  | -1.741346 | 1.661101  |
| C | 4.405381  | -2.446612 | 2.968937  |
| F | 5.638895  | -2.899441 | 3.418914  |
| F | 3.571355  | -3.549900 | 2.876956  |
| F | 3.861068  | -1.594942 | 3.919904  |
| C | 5.552742  | -2.150618 | 0.770186  |
| C | 5.644179  | -1.529050 | -0.475722 |
| C | 6.646093  | -2.011258 | -1.472820 |
| F | 6.156240  | -3.037014 | -2.263795 |
| F | 7.775497  | -2.492555 | -0.824083 |
| F | 7.018308  | -0.976308 | -2.322098 |
| C | 4.767149  | -0.496849 | -0.823122 |
| O | -0.880984 | -1.523093 | 1.150133  |
| H | -4.492317 | 2.232311  | 1.209064  |
| H | 4.550341  | 2.194625  | -1.146105 |
| H | 0.694700  | 4.337149  | 1.314300  |
| H | -0.270715 | 6.136785  | 2.727900  |
| H | -2.712813 | 6.163864  | 3.256524  |
| H | -4.195340 | 4.336220  | 2.423751  |
| H | 4.313766  | 4.346569  | -2.294889 |
| H | 2.884117  | 6.241835  | -3.065726 |
| H | 0.433935  | 6.245963  | -2.575192 |
| H | -0.592901 | 4.403808  | -1.261454 |
| H | -4.776085 | -0.022273 | 1.814010  |
| H | -6.281089 | -2.854501 | -1.058540 |
| H | -3.005049 | -0.273338 | -2.137214 |
| H | 2.918635  | -0.405516 | 2.051301  |

|   |           |           |           |
|---|-----------|-----------|-----------|
| H | 6.266017  | -2.925222 | 1.054830  |
| H | 4.863722  | -0.031682 | -1.806755 |
| H | -1.270509 | -2.434801 | 1.013587  |

-----  
Statistical Thermodynamic Analysis

Temperature= 233.150 Kelvin    Pressure= 1.00000 Atm

```
SCF Energy= -3202.35639762    Predicted Change= -8.538624D-09
Zero-point correction (ZPE)= -3201.8931    0.46325
Internal Energy (U)= -3201.8652    0.49110
Enthalpy (H)= -3201.8645    0.49184
Gibbs Free Energy (G)= -3201.9496    0.40674
```

-----  
Frequencies --    10.0475            11.9360            14.1118

PBE-D3BJ = -0.11363749

PBE/6-311++G(2df,p) = -3220.310465

PBE/6-31+G(d,p) = -3219.471946

PBE/6-31+G(d,p)/SMD(Toluene) = -3219.504135

**(R)-phosphate-acetal**-----  
Using Gaussian 09: AM64L-G09RevD.01 24-Apr-2013

```
#pbepbe/3-21G*/auto gfpri gfinp scf=(direct,tight,maxcycle=300,xqc)
opt=(maxcycle=250,gdiis) iop(1/8=18) freq=noraman temp=233.15
#P Geom=AllCheck Guess=TCheck SCRF=Check Test GenChk RPBEPBE/3-21G*/Auto
Freq
```

-----  
Pointgroup= C1    Stoichiometry= C57H33F18N2O6P    C1[X(C57H33F18N2O6P)] #Atoms= 117  
Charge = 0            Multiplicity = 1-----  
SCF Energy= -4860.62396151    Predicted Change= -2.621671D-08

```
Optimization completed.            {Found    1    times}
Item    Max Val.    Criteria    Pass?    RMS Val.    Criteria    Pass?
Force    0.00005 || 0.00045 [ YES ]    0.00000 || 0.00030 [ YES ]
Displ    0.00367 || 0.00180 [ NO ]    0.00367 || 0.00180 [ YES ]
```

```
-----
Atomic            Coordinates (Angstroms)
Type            X            Y            Z
-----
C    0.862477    3.138304    2.339430
C    1.753544    2.033668    2.399351
C    1.306244    0.743795    2.123064
C    2.310245    -0.354715    2.053491
C    -0.088150    0.518003    1.906773
O    -0.555372    -0.810024    1.586938
C    -1.003418    1.570875    1.935916
C    -2.471365    1.288084    1.889877
C    -0.533522    2.924700    2.069301
C    -3.024173    0.517654    0.869468
O    -2.246001    -0.011966    -0.192772
C    -4.431325    0.276488    0.809763
```

|   |           |           |           |
|---|-----------|-----------|-----------|
| C | -4.970567 | -0.691561 | -0.188029 |
| C | -5.279755 | 0.867143  | 1.731742  |
| C | -4.749374 | 1.634675  | 2.806222  |
| C | -3.325510 | 1.814291  | 2.927924  |
| C | -1.376041 | 4.054107  | 1.866404  |
| C | -0.863252 | 5.336399  | 1.972247  |
| C | 0.499307  | 5.547814  | 2.315834  |
| C | 1.351570  | 4.471465  | 2.490733  |
| C | -5.614684 | 2.170728  | 3.806744  |
| C | -5.092480 | 2.836448  | 4.901609  |
| C | -3.686157 | 2.972983  | 5.047521  |
| C | -2.820527 | 2.475279  | 4.086558  |
| C | 3.591044  | -0.077149 | 1.533556  |
| C | 4.572115  | -1.071649 | 1.489859  |
| C | 5.947085  | -0.722935 | 1.018642  |
| F | 6.594290  | -1.843692 | 0.530136  |
| F | 6.724102  | -0.205760 | 2.047851  |
| F | 5.883443  | 0.250792  | 0.028371  |
| C | 4.290110  | -2.368804 | 1.914668  |
| C | 3.019546  | -2.655167 | 2.421844  |
| C | 2.735169  | -4.034112 | 2.911981  |
| F | 3.144763  | -4.996251 | 1.981686  |
| F | 1.380083  | -4.215795 | 3.159557  |
| F | 3.416904  | -4.323084 | 4.082336  |
| C | 2.038651  | -1.663392 | 2.503493  |
| C | -5.974073 | -0.360529 | -1.112402 |
| C | -6.487292 | -1.342630 | -1.971584 |
| C | -7.503044 | -0.962149 | -2.999265 |
| F | -8.279248 | 0.094413  | -2.542299 |
| F | -8.327987 | -2.042479 | -3.282498 |
| F | -6.920904 | -0.562832 | -4.190746 |
| C | -6.015654 | -2.657483 | -1.924456 |
| C | -5.018337 | -2.986759 | -1.003868 |
| C | -4.447520 | -4.362929 | -0.946382 |
| F | -3.249741 | -4.481046 | -1.657702 |
| F | -5.327772 | -5.290904 | -1.470123 |
| F | -4.145912 | -4.717019 | 0.371066  |
| P | -0.962493 | -0.995250 | 0.001575  |
| O | -1.590166 | -2.448975 | -0.081182 |
| C | -4.508733 | -2.016669 | -0.139264 |
| O | 0.076767  | -0.624723 | -1.012406 |
| C | 4.916294  | -1.560131 | -2.178918 |
| C | 6.166697  | -1.119383 | -2.631876 |
| C | 7.169133  | -2.069861 | -2.852198 |
| C | 6.934796  | -3.445046 | -2.623265 |
| C | 5.693901  | -3.903870 | -2.167569 |
| C | 4.681817  | -2.953412 | -1.945644 |
| C | 3.304271  | -3.089161 | -1.493580 |
| C | 2.565893  | -4.355104 | -1.147084 |
| C | 1.041142  | -4.218520 | -1.244209 |
| O | 0.560626  | -3.664895 | 0.078656  |
| C | -0.833000 | -3.780343 | 0.263242  |
| C | -1.183060 | -4.069246 | 1.709470  |
| C | 2.758378  | -1.831146 | -1.457118 |
| N | 3.715833  | -0.877023 | -1.880780 |
| C | 3.548726  | 0.532329  | -1.995488 |

|   |           |           |           |
|---|-----------|-----------|-----------|
| N | 2.245875  | 0.948899  | -1.751618 |
| C | 1.810355  | 2.283129  | -1.793083 |
| O | 4.504235  | 1.281480  | -2.302131 |
| C | 2.645564  | 3.400090  | -2.008618 |
| C | 2.116099  | 4.692143  | -1.996839 |
| C | 3.042775  | 5.854637  | -2.119411 |
| F | 2.388910  | 6.937516  | -2.695184 |
| F | 4.146077  | 5.529684  | -2.892652 |
| F | 3.518126  | 6.278637  | -0.884268 |
| C | 0.752952  | 4.917773  | -1.798611 |
| C | -0.084922 | 3.816336  | -1.604961 |
| C | -1.556762 | 4.020545  | -1.490849 |
| F | -1.839527 | 5.245447  | -0.890650 |
| F | -2.143574 | 3.011510  | -0.722852 |
| F | -2.200380 | 4.013934  | -2.717577 |
| C | 0.428285  | 2.520856  | -1.594992 |
| H | 2.807328  | 2.207662  | 2.634577  |
| H | -6.356969 | 0.682355  | 1.677089  |
| H | -2.406835 | 3.890682  | 1.554102  |
| H | -1.507586 | 6.193717  | 1.761690  |
| H | 0.880604  | 6.568797  | 2.406106  |
| H | 2.413099  | 4.624630  | 2.708643  |
| H | -6.695184 | 2.034047  | 3.695303  |
| H | -5.757977 | 3.243958  | 5.667715  |
| H | -3.282413 | 3.472224  | 5.933066  |
| H | -1.741239 | 2.579717  | 4.209562  |
| H | 3.823114  | 0.906508  | 1.118374  |
| H | 5.045886  | -3.148950 | 1.811114  |
| H | 1.062977  | -1.915391 | 2.911301  |
| H | -6.367342 | 0.656961  | -1.169590 |
| H | -6.444712 | -3.419908 | -2.575896 |
| H | -3.749297 | -2.301016 | 0.584957  |
| H | -1.330308 | -4.452017 | -0.451101 |
| H | 0.564430  | -5.206005 | -1.380594 |
| H | 0.742893  | -3.537667 | -2.058934 |
| H | -0.939892 | -3.197861 | 2.334242  |
| H | -2.259559 | -4.287324 | 1.759176  |
| H | -0.597161 | -4.930659 | 2.058296  |
| H | 6.330921  | -0.055374 | -2.784135 |
| H | 8.150612  | -1.738619 | -3.202357 |
| H | 7.742469  | -4.160646 | -2.803968 |
| H | 5.513009  | -4.966907 | -1.986431 |
| H | 2.796092  | -4.677553 | -0.115731 |
| H | 2.883910  | -5.161917 | -1.835641 |
| H | 1.759407  | -1.552020 | -1.146671 |
| H | 1.493241  | 0.269099  | -1.531599 |
| H | 3.703545  | 3.234597  | -2.198717 |
| H | 0.351206  | 5.930556  | -1.796898 |
| H | -0.247385 | 1.683801  | -1.413790 |

-----  
Statistical Thermodynamic Analysis

Temperature= 233.150 Kelvin    Pressure= 1.00000 Atm

=====

SCF Energy= -4860.62396151    Predicted Change= -2.621671D-08

Zero-point correction (ZPE)= -4859.8146    0.80928

Internal Energy (U)= -4859.7699    0.85402



Enthalpy (H)= -4859.7692 0.85476  
 Gibbs Free Energy (G)= -4859.8887 0.73525

-----  
 Frequencies -- 8.3542 11.2910 13.9287

PBE-D3BJ = -0.214050  
 PBE/6-311++G(2df,p) = -4887.924556  
 PBE/6-31+G(d,p) = -4886.637592  
 PBE/6-31+G(d,p)/SMD(Toluene) = -4886.679043

## Spirocyclization

-----  
 Using Gaussian 09: AM64L-G09RevD.01 24-Apr-2013

=====

```
#pbepbe/3-21G*/auto scf=(maxcycle=300,direct,tight) density=current
opt=(maxcycle=250,ts,calcfc,noeigentest,gdiis) iop(1/8=18) freq=noraman
temp=233.15
#P Geom=AllCheck Guess=TCheck SCRF=Check Test GenChk RPBEPBE/3-21G*/Auto
Freq
```

-----

```
Pointgroup= C1 Stoichiometry= C57H33F18N2O6P C1[X(C57H33F18N2O6P)] #Atoms= 117
Charge = 0 Multiplicity = 1
```

-----

```
SCF Energy= -4860.59272684 Predicted Change= -2.973827D-08
```

=====

```
Optimization completed. {Found 1 times}
Item Max Val. Criteria Pass? RMS Val. Criteria Pass?
Force 0.00007 || 0.00045 [ YES ] 0.00000 || 0.00030 [ YES ]
Displ 0.00777 || 0.00180 [ NO ] 0.00777 || 0.00180 [ YES ]
```

-----

| Atomic Type | Coordinates (Angstroms) |           |           |
|-------------|-------------------------|-----------|-----------|
|             | X                       | Y         | Z         |
| C           | 3.405119                | -3.805556 | -0.381016 |
| C           | 4.767459                | -4.121672 | -0.389159 |
| C           | 5.137231                | -5.444502 | -0.107912 |
| C           | 4.167539                | -6.427722 | 0.183528  |
| C           | 2.801329                | -6.114010 | 0.226958  |
| C           | 2.425592                | -4.793514 | -0.054342 |
| C           | 1.114819                | -4.128300 | -0.057059 |
| C           | -0.196368               | -4.562325 | 0.549041  |
| C           | -1.116177               | -5.162099 | -0.550022 |
| O           | -0.954658               | -4.231207 | -1.700668 |
| C           | 0.351558                | -4.124896 | -2.076148 |
| C           | 0.594429                | -2.991156 | -3.034980 |
| C           | 1.376912                | -2.774274 | -0.371276 |
| N           | 2.710254                | -2.577838 | -0.607029 |
| C           | 3.346429                | -1.353733 | -1.096911 |
| N           | 2.453741                | -0.346249 | -1.323343 |
| C           | 2.810482                | 0.923615  | -1.832050 |
| O           | 4.581147                | -1.348390 | -1.282375 |
| C           | 1.749345                | 1.811903  | -2.117945 |
| C           | 2.004105                | 3.079717  | -2.636252 |
| C           | 0.866636                | 4.017501  | -2.872981 |
| F           | 0.577455                | 4.785880  | -1.755074 |

|   |           |           |           |
|---|-----------|-----------|-----------|
| F | 1.177094  | 4.895205  | -3.905792 |
| C | 3.313701  | 3.501921  | -2.879544 |
| C | 4.366797  | 2.637398  | -2.577080 |
| C | 5.773957  | 3.107706  | -2.736737 |
| F | 6.237276  | 3.761363  | -1.602664 |
| F | 5.865666  | 4.007012  | -3.791459 |
| F | 6.626783  | 2.041382  | -2.974748 |
| C | 4.130096  | 1.361382  | -2.060025 |
| F | -0.282788 | 3.317221  | -3.205053 |
| H | -2.179210 | -5.094317 | -0.292463 |
| H | -0.805001 | -6.178941 | -0.847246 |
| H | 0.937298  | -5.047753 | -2.203065 |
| H | 1.673505  | -2.821305 | -3.167821 |
| H | 0.167035  | -3.267816 | -4.018992 |
| H | 0.099128  | -2.072349 | -2.677171 |
| H | 5.497225  | -3.333764 | -0.562257 |
| H | 6.197404  | -5.710631 | -0.103278 |
| H | 4.492297  | -7.448875 | 0.401113  |
| H | 2.054406  | -6.867886 | 0.488740  |
| H | -0.711482 | -3.661747 | 0.932284  |
| H | -0.032026 | -5.289299 | 1.360544  |
| H | 0.643403  | -1.971563 | -0.461020 |
| H | 1.418796  | -0.414883 | -1.078003 |
| H | 0.720041  | 1.489528  | -1.943583 |
| H | 3.506661  | 4.477608  | -3.325305 |
| H | 4.961303  | 0.703908  | -1.825220 |
| C | -1.116948 | 2.569970  | 1.426256  |
| C | -2.581003 | 2.263290  | 1.531431  |
| C | -0.205650 | 1.530074  | 1.611791  |
| O | -0.680846 | 0.202730  | 1.676700  |
| C | 1.200814  | 1.789593  | 1.731562  |
| C | 2.160741  | 0.676656  | 1.995186  |
| C | 1.666781  | 3.095846  | 1.614649  |
| C | 0.769456  | 4.160020  | 1.320412  |
| C | -0.646035 | 3.910462  | 1.216477  |
| C | -3.381032 | 2.949720  | 2.514064  |
| C | -4.791573 | 2.665324  | 2.569693  |
| C | -5.356263 | 1.691618  | 1.700696  |
| C | -4.553863 | 0.981344  | 0.817207  |
| C | -5.187175 | -0.064752 | -0.038948 |
| C | -3.154553 | 1.272614  | 0.730101  |
| O | -2.392619 | 0.559921  | -0.215963 |
| C | 1.262355  | 5.486918  | 1.131168  |
| C | 0.392239  | 6.517436  | 0.822864  |
| C | -0.999592 | 6.264638  | 0.684047  |
| C | -1.510686 | 4.991766  | 0.878993  |
| C | -2.831843 | 3.855070  | 3.470438  |
| C | -3.647186 | 4.474340  | 4.404381  |
| C | -5.045085 | 4.222100  | 4.431657  |
| C | -5.606327 | 3.328411  | 3.536515  |
| C | 1.769259  | -0.472883 | 2.717358  |
| C | 2.665645  | -1.527969 | 2.914053  |
| C | 2.167145  | -2.779840 | 3.554079  |
| F | 1.210972  | -2.498413 | 4.514543  |
| F | 3.207743  | -3.485633 | 4.136309  |
| F | 1.565137  | -3.633919 | 2.622609  |

|   |           |           |           |
|---|-----------|-----------|-----------|
| C | 3.974579  | -1.459872 | 2.437707  |
| C | 4.384266  | -0.310685 | 1.755909  |
| C | 5.810448  | -0.203654 | 1.320800  |
| F | 5.953826  | 0.693758  | 0.270532  |
| F | 6.299174  | -1.447323 | 0.931605  |
| F | 6.628551  | 0.242330  | 2.348674  |
| C | 3.492095  | 0.743373  | 1.523969  |
| C | -6.413117 | 0.215699  | -0.673566 |
| C | -7.073658 | -0.766373 | -1.419575 |
| C | -8.411081 | -0.465239 | -2.007458 |
| F | -8.643486 | -1.259365 | -3.122424 |
| F | -8.491178 | 0.870651  | -2.378244 |
| F | -9.444869 | -0.701894 | -1.111999 |
| C | -6.517526 | -2.037535 | -1.567100 |
| C | -5.294927 | -2.318142 | -0.953163 |
| C | -4.651956 | -3.649324 | -1.162150 |
| F | -3.571391 | -3.600832 | -2.028526 |
| F | -5.561236 | -4.565947 | -1.672781 |
| F | -4.149573 | -4.161459 | 0.043415  |
| P | -1.214314 | -0.503851 | 0.257806  |
| C | -4.627522 | -1.351513 | -0.190107 |
| O | -0.158501 | -0.390912 | -0.853783 |
| O | -1.743502 | -1.860427 | 0.649618  |
| H | 2.729146  | 3.318952  | 1.749354  |
| H | -6.423013 | 1.458679  | 1.775923  |
| H | 2.338529  | 5.667537  | 1.220567  |
| H | 0.773336  | 7.531007  | 0.669081  |
| H | -1.671191 | 7.084739  | 0.414103  |
| H | -2.579449 | 4.795013  | 0.767625  |
| H | -1.757266 | 4.046623  | 3.460515  |
| H | -3.209485 | 5.160561  | 5.135411  |
| H | -5.671004 | 4.725023  | 5.174297  |
| H | -6.678147 | 3.105761  | 3.562005  |
| H | 0.757388  | -0.561394 | 3.107285  |
| H | 4.662616  | -2.293699 | 2.584088  |
| H | 3.830800  | 1.588754  | 0.920949  |
| H | -6.846590 | 1.217555  | -0.619594 |
| H | -7.026324 | -2.795867 | -2.162168 |
| H | -3.671255 | -1.621980 | 0.273382  |

-----  
Statistical Thermodynamic Analysis

Temperature= 233.150 Kelvin    Pressure= 1.00000 Atm

---

|                              |                |                   |               |
|------------------------------|----------------|-------------------|---------------|
| SCF Energy=                  | -4860.59272684 | Predicted Change= | -2.973827D-08 |
| Zero-point correction (ZPE)= | -4859.7855     |                   | 0.80720       |
| Internal Energy (U)=         | -4859.7410     |                   | 0.85166       |
| Enthalpy (H)=                | -4859.7403     |                   | 0.85240       |
| Gibbs Free Energy (G)=       | -4859.8591     |                   | 0.73361       |

---

Frequencies -- -149.3618            7.2642            14.3787

PBE-D3BJ = -0.213688

PBE/6-311++G(2df,p) = -4887.902465

PBE/6-31+G(d,p) = -4886.616715

PBE/6-31+G(d,p)/SMD(Toluene) = -4886.659385

## Spirocycle

Using Gaussian 09: AM64L-G09RevD.01 24-Apr-2013

```
#pbepbe/3-21G*/auto gfpri n gfinput scf=(direct,tight,maxcycle=300,xqc)
opt=(maxcycle=250,gsii) iop(1/8=18) freq=noraman temp=233.15
#P Geom=AllCheck Guess=TCheck SCRF=Check Test GenChk RPBEPBE/3-21G*/Auto
Freq
```

Pointgroup= C1 Stoichiometry= C57H33F18N2O6P C1[X(C57H33F18N2O6P)] #Atoms= 117  
Charge = 0 Multiplicity = 1

SCF Energy= -4860.61239423 Predicted Change= -2.116080D-08

```
Optimization completed.      {Found 1 times}
Item  Max Val.  Criteria  Pass?  RMS Val.  Criteria  Pass?
Force  0.00002 || 0.00045 [ YES ]   0.00000 || 0.00030 [ YES ]
Displ  0.00703 || 0.00180 [ NO ]    0.00703 || 0.00180 [ YES ]
```

| Atomic Type | Coordinates (Angstroms) |           |           |
|-------------|-------------------------|-----------|-----------|
|             | X                       | Y         | Z         |
| C           | 3.483347                | -3.612050 | -0.389039 |
| C           | 4.849662                | -3.648884 | -0.099480 |
| C           | 5.371676                | -4.839872 | 0.429266  |
| C           | 4.543144                | -5.955038 | 0.653570  |
| C           | 3.166334                | -5.908191 | 0.371189  |
| C           | 2.646191                | -4.722567 | -0.145031 |
| C           | 1.238227                | -4.373281 | -0.563339 |
| C           | 0.085314                | -4.532059 | 0.491193  |
| C           | -1.089460               | -5.170338 | -0.318318 |
| O           | -0.705264               | -5.062986 | -1.750965 |
| C           | 0.724890                | -5.289939 | -1.765032 |
| C           | 1.267667                | -4.943702 | -3.144002 |
| C           | 1.383350                | -2.965294 | -1.019405 |
| N           | 2.645991                | -2.551499 | -0.911200 |
| C           | 3.216562                | -1.221356 | -1.333909 |
| N           | 2.252129                | -0.289152 | -1.470418 |
| C           | 2.491266                | 1.034612  | -1.909388 |
| O           | 4.447245                | -1.148493 | -1.507427 |
| C           | 1.358420                | 1.856648  | -2.094906 |
| C           | 1.506037                | 3.190435  | -2.468246 |
| C           | 0.293814                | 4.031638  | -2.702045 |
| F           | 0.570332                | 5.360965  | -2.409019 |
| F           | -0.126131               | 3.982549  | -4.023757 |
| C           | 2.776249                | 3.738962  | -2.665765 |
| C           | 3.898945                | 2.928563  | -2.490173 |
| C           | 5.262858                | 3.485802  | -2.732773 |
| F           | 6.190835                | 2.882982  | -1.895021 |
| F           | 5.270223                | 4.856138  | -2.501434 |
| F           | 5.691179                | 3.284794  | -4.034850 |
| C           | 3.768726                | 1.587670  | -2.118336 |
| F           | -0.761612               | 3.596693  | -1.915634 |
| H           | -2.032780               | -4.626708 | -0.206196 |
| H           | -1.206524               | -6.235214 | -0.041738 |

|   |           |           |           |
|---|-----------|-----------|-----------|
| H | 0.988212  | -6.326590 | -1.461981 |
| H | 2.369828  | -4.956529 | -3.139299 |
| H | 0.903588  | -5.677999 | -3.882228 |
| H | 0.903176  | -3.947789 | -3.446387 |
| H | 5.471350  | -2.770483 | -0.247957 |
| H | 6.436827  | -4.893664 | 0.667408  |
| H | 4.975574  | -6.870416 | 1.066219  |
| H | 2.521700  | -6.768995 | 0.565689  |
| H | -0.242841 | -3.554799 | 0.883434  |
| H | 0.434807  | -5.163388 | 1.322408  |
| H | 0.568106  | -2.304636 | -1.340691 |
| H | 1.224234  | -0.455823 | -1.147455 |
| H | 0.364433  | 1.448112  | -1.899509 |
| H | 2.888702  | 4.794886  | -2.911016 |
| H | 4.651936  | 0.986787  | -1.919026 |
| C | -1.055232 | 2.490713  | 1.374730  |
| C | -2.502157 | 2.164893  | 1.565335  |
| C | -0.104943 | 1.480042  | 1.528431  |
| O | -0.520202 | 0.137662  | 1.642587  |
| C | 1.294548  | 1.798551  | 1.594265  |
| C | 2.318402  | 0.741203  | 1.829679  |
| C | 1.705940  | 3.120806  | 1.449490  |
| C | 0.765461  | 4.144840  | 1.155804  |
| C | -0.639613 | 3.839313  | 1.105789  |
| C | -3.260212 | 2.881760  | 2.559794  |
| C | -4.669515 | 2.613327  | 2.673100  |
| C | -5.273203 | 1.633993  | 1.838001  |
| C | -4.507880 | 0.895196  | 0.945057  |
| C | -5.182197 | -0.142111 | 0.114960  |
| C | -3.105948 | 1.155571  | 0.814346  |
| O | -2.373833 | 0.416910  | -0.134149 |
| C | 1.203648  | 5.478669  | 0.891250  |
| C | 0.286471  | 6.460798  | 0.561308  |
| C | -1.099803 | 6.153710  | 0.488967  |
| C | -1.556109 | 4.873581  | 0.756683  |
| C | -2.668454 | 3.807172  | 3.470154  |
| C | -3.443407 | 4.456927  | 4.417711  |
| C | -4.841166 | 4.217462  | 4.503551  |
| C | -5.442761 | 3.307155  | 3.652428  |
| C | 3.628584  | 0.892622  | 1.322078  |
| C | 4.598028  | -0.093254 | 1.536125  |
| C | 5.991867  | 0.121977  | 1.044068  |
| F | 6.018096  | 0.976787  | -0.049775 |
| F | 6.582894  | -1.091494 | 0.679096  |
| F | 6.809261  | 0.677164  | 2.014631  |
| C | 4.287250  | -1.259898 | 2.240359  |
| C | 2.991800  | -1.421844 | 2.732920  |
| C | 2.586932  | -2.714351 | 3.357845  |
| F | 3.684823  | -3.381438 | 3.876532  |
| F | 1.992110  | -3.565075 | 2.417300  |
| F | 1.656071  | -2.513786 | 4.360881  |
| C | 2.018470  | -0.434367 | 2.552840  |
| C | -4.653529 | -1.440882 | -0.023568 |
| C | -5.350688 | -2.401509 | -0.765561 |
| C | -4.735613 | -3.748307 | -0.946128 |
| F | -5.673503 | -4.675786 | -1.374233 |

|   |           |           |           |
|---|-----------|-----------|-----------|
| F | -4.181054 | -4.196659 | 0.257621  |
| F | -3.692901 | -3.744163 | -1.862262 |
| C | -6.573052 | -2.103347 | -1.369803 |
| C | -7.100001 | -0.818142 | -1.233519 |
| C | -8.437729 | -0.496153 | -1.809289 |
| F | -8.497066 | 0.838821  | -2.187694 |
| F | -9.466457 | -0.708034 | -0.901738 |
| F | -8.696325 | -1.292721 | -2.916437 |
| P | -1.182789 | -0.646333 | 0.317176  |
| C | -6.409508 | 0.158275  | -0.507462 |
| O | -0.220364 | -0.609680 | -0.880988 |
| O | -1.707951 | -1.965184 | 0.823107  |
| H | 2.761754  | 3.386739  | 1.553033  |
| H | -6.341583 | 1.421405  | 1.943622  |
| H | 2.274919  | 5.700730  | 0.933424  |
| H | 0.624768  | 7.477579  | 0.342733  |
| H | -1.809749 | 6.935883  | 0.205231  |
| H | -2.619039 | 4.632628  | 0.688989  |
| H | -1.593703 | 3.989619  | 3.414783  |
| H | -2.973447 | 5.157811  | 5.113957  |
| H | -5.434804 | 4.744306  | 5.256044  |
| H | -6.514868 | 3.095844  | 3.722286  |
| H | 3.892349  | 1.754931  | 0.706131  |
| H | 5.032605  | -2.041345 | 2.388891  |
| H | 1.020512  | -0.591237 | 2.957869  |
| H | -3.701094 | -1.723902 | 0.438802  |
| H | -7.105310 | -2.860548 | -1.945965 |
| H | -6.820091 | 1.169980  | -0.459608 |

-----  
Statistical Thermodynamic Analysis

Temperature= 233.150 Kelvin    Pressure= 1.00000 Atm

```

=====
SCF Energy= -4860.61239423    Predicted Change= -2.116080D-08
Zero-point correction (ZPE)= -4859.8052    0.80716
Internal Energy (U)= -4859.7602    0.85213
Enthalpy (H)= -4859.7595    0.85287
Gibbs Free Energy (G)= -4859.8805    0.73189
=====

```

```

-----
Frequencies --    6.6691            8.1393            16.9051

```

PBE-D3BJ = -0.21397123

PBE/6-311++G(2df,p) = -4887.913510

PBE/6-31+G(d,p) = -4886.629437

PBE/6-31+G(d,p)/SMD(Toluene) = -4886.671302

**1,2-shift**-----  
Using Gaussian 09: AM64L-G09RevD.01 24-Apr-2013

```

=====
#pbe/3-21G*/auto scf=(maxcycle=300,direct,tight) density=current
opt=(maxcycle=250,ts,calcfc,noeigentest,gdiis) iop(1/8=18) freq=noraman
temp=233.15
#P Geom=AllCheck Guess=TCheck SCRF=Check Test GenChk RPBE/3-21G*/Auto
Freq

```

Pointgroup= C1 Stoichiometry= C57H33F18N2O6P C1[X(C57H33F18N2O6P)] #Atoms= 117  
 Charge = 0 Multiplicity = 1

SCF Energy= -4860.59172901 Predicted Change= -6.523902D-09

Optimization completed. {Found 2 times}  
 Item Max Val. Criteria Pass? RMS Val. Criteria Pass?  
 Force 0.00001 || 0.00045 [ YES ] 0.00000 || 0.00030 [ YES ]  
 Displ 0.00145 || 0.00180 [ YES ] 0.00145 || 0.00180 [ YES ]

| Atomic Type | Coordinates (Angstroms) |           |           |
|-------------|-------------------------|-----------|-----------|
|             | X                       | Y         | Z         |
| C           | 2.833843                | -3.913550 | -0.122990 |
| C           | 4.122707                | -4.254557 | 0.303742  |
| C           | 4.307375                | -5.515270 | 0.887112  |
| C           | 3.232162                | -6.418331 | 1.044359  |
| C           | 1.935544                | -6.081080 | 0.638321  |
| C           | 1.743529                | -4.820898 | 0.051520  |
| C           | 0.540717                | -4.157487 | -0.443606 |
| C           | -0.906404               | -4.530756 | -0.300977 |
| C           | -1.479411               | -5.075231 | -1.649371 |
| O           | -0.814844               | -4.305065 | -2.738651 |
| C           | 0.539811                | -4.395781 | -2.648634 |
| C           | 1.299399                | -3.556343 | -3.632339 |
| C           | 0.956802                | -2.881324 | -0.906961 |
| N           | 2.313960                | -2.727978 | -0.711058 |
| C           | 3.138357                | -1.579043 | -1.101129 |
| N           | 2.385975                | -0.475399 | -1.364503 |
| C           | 2.910807                | 0.754531  | -1.816994 |
| O           | 4.378930                | -1.715940 | -1.158860 |
| C           | 1.981096                | 1.793116  | -2.051251 |
| C           | 2.412514                | 3.056841  | -2.446214 |
| C           | 1.409959                | 4.131312  | -2.710817 |
| F           | 1.938188                | 5.371074  | -2.364558 |
| F           | 1.054002                | 4.201804  | -4.050726 |
| C           | 3.773569                | 3.322636  | -2.626593 |
| C           | 4.695254                | 2.298809  | -2.405315 |
| C           | 6.150552                | 2.547203  | -2.625250 |
| F           | 6.434504                | 3.901847  | -2.496628 |
| F           | 6.566847                | 2.156626  | -3.889146 |
| F           | 6.912339                | 1.839152  | -1.707134 |
| C           | 4.279997                | 1.026110  | -2.002867 |
| F           | 0.250667                | 3.910691  | -1.985286 |
| H           | -2.545823               | -4.850986 | -1.758533 |
| H           | -1.250755               | -6.146584 | -1.780980 |
| H           | 0.978975                | -5.368044 | -2.381132 |
| H           | 2.339688                | -3.423259 | -3.296871 |
| H           | 1.326378                | -4.088074 | -4.604950 |
| H           | 0.811648                | -2.580645 | -3.778041 |
| H           | 4.933319                | -3.534078 | 0.214992  |
| H           | 5.304787                | -5.798397 | 1.233921  |
| H           | 3.416425                | -7.390475 | 1.509405  |
| H           | 1.095935                | -6.764274 | 0.789619  |
| H           | -1.466652               | -3.621196 | -0.002905 |

|   |           |           |           |
|---|-----------|-----------|-----------|
| H | -1.031644 | -5.309738 | 0.471179  |
| H | 0.325069  | -2.059121 | -1.252728 |
| H | 1.338193  | -0.426940 | -1.121648 |
| H | 0.919586  | 1.604926  | -1.874383 |
| H | 4.113105  | 4.323349  | -2.892688 |
| H | 5.010042  | 0.258557  | -1.764066 |
| C | -0.968512 | 2.657577  | 1.280557  |
| C | -2.447741 | 2.454136  | 1.411182  |
| C | -0.125762 | 1.568535  | 1.506190  |
| O | -0.681998 | 0.270527  | 1.585738  |
| C | 1.293858  | 1.741599  | 1.620694  |
| C | 2.183110  | 0.590653  | 1.958241  |
| C | 1.843096  | 3.007135  | 1.433969  |
| C | 1.018096  | 4.107355  | 1.068586  |
| C | -0.411962 | 3.949436  | 0.994148  |
| C | -3.184746 | 3.227719  | 2.376705  |
| C | -4.608097 | 3.032074  | 2.469973  |
| C | -5.246325 | 2.055858  | 1.657148  |
| C | -4.507182 | 1.267397  | 0.783608  |
| C | -5.220780 | 0.214159  | 0.001773  |
| C | -3.095244 | 1.473704  | 0.654909  |
| O | -2.403087 | 0.700352  | -0.289567 |
| C | 1.598534  | 5.375401  | 0.762531  |
| C | 0.796642  | 6.435423  | 0.376309  |
| C | -0.612451 | 6.275342  | 0.287663  |
| C | -1.206760 | 5.060766  | 0.590530  |
| C | -2.564075 | 4.143682  | 3.277460  |
| C | -3.322700 | 4.856687  | 4.192164  |
| C | -4.732101 | 4.689227  | 4.256989  |
| C | -5.362765 | 3.787224  | 3.418282  |
| C | 1.716503  | -0.496367 | 2.731633  |
| C | 2.561934  | -1.569491 | 3.027506  |
| C | 2.001201  | -2.768879 | 3.716362  |
| F | 0.984072  | -2.408174 | 4.585670  |
| F | 2.993928  | -3.430733 | 4.427588  |
| F | 1.468108  | -3.679300 | 2.810182  |
| C | 3.887342  | -1.583634 | 2.595390  |
| C | 4.362246  | -0.510954 | 1.837381  |
| C | 5.795808  | -0.508628 | 1.418832  |
| F | 6.009089  | 0.316040  | 0.324772  |
| F | 6.219464  | -1.801587 | 1.101559  |
| F | 6.630044  | -0.064189 | 2.434157  |
| C | 3.524850  | 0.563280  | 1.513346  |
| C | -4.721410 | -1.102795 | -0.114401 |
| C | -5.494476 | -2.089880 | -0.737561 |
| C | -4.971064 | -3.480956 | -0.861110 |
| F | -4.342307 | -3.713661 | -2.097092 |
| F | -5.999582 | -4.407453 | -0.770359 |
| F | -4.017313 | -3.772594 | 0.105378  |
| C | -6.755337 | -1.796725 | -1.265595 |
| C | -7.233377 | -0.489140 | -1.188642 |
| C | -8.532438 | -0.134758 | -1.831666 |
| F | -9.385388 | -1.231212 | -1.835183 |
| F | -8.379375 | 0.270604  | -3.148648 |
| F | -9.143154 | 0.910165  | -1.149704 |
| P | -1.223184 | -0.383289 | 0.143344  |



|   |           |           |           |
|---|-----------|-----------|-----------|
| C | -6.478094 | 0.507996  | -0.560662 |
| O | -0.177924 | -0.237884 | -0.968115 |
| O | -1.794201 | -1.736855 | 0.479717  |
| H | 2.917855  | 3.168273  | 1.557328  |
| H | -6.321402 | 1.885122  | 1.770722  |
| H | 2.686362  | 5.485914  | 0.817120  |
| H | 1.246365  | 7.399746  | 0.123883  |
| H | -1.230625 | 7.117677  | -0.036116 |
| H | -2.288450 | 4.931278  | 0.508355  |
| H | -1.480692 | 4.271271  | 3.238737  |
| H | -2.830890 | 5.551973  | 4.878864  |
| H | -5.312201 | 5.264701  | 4.984014  |
| H | -6.445142 | 3.630670  | 3.473404  |
| H | 0.688507  | -0.521849 | 3.087500  |
| H | 4.533357  | -2.429827 | 2.831869  |
| H | 3.914470  | 1.348372  | 0.861883  |
| H | -3.739805 | -1.384808 | 0.282261  |
| H | -7.372657 | -2.580389 | -1.707168 |
| H | -6.885374 | 1.520448  | -0.504768 |

-----  
Statistical Thermodynamic Analysis

Temperature= 233.150 Kelvin    Pressure= 1.00000 Atm

-----  
SCF Energy= -4860.59172901    Predicted Change= -6.523902D-09

Zero-point correction (ZPE)= -4859.7847    0.80697

Internal Energy (U)= -4859.7402    0.85145

Enthalpy (H)= -4859.7395    0.85219

Gibbs Free Energy (G)= -4859.8581    0.73358

-----  
Frequencies -- -138.0899    9.9425    14.0987

PBE-D3BJ = -0.213480

PBE/6-311++G(2df,p) = -4887.903842

PBE/6-31+G(d,p) = -4886.617810

PBE/6-31+G(d,p)/SMD(Toluene) = -4886.661474

**[6.5.6]-chair**-----  
Using Gaussian 09: AM64L-G09RevD.01 24-Apr-2013-----  
#pbepbe/3-21G\*/auto gfpri n gfinpu t scf=(direct,tight,maxcycle=300,xqc)

opt=(maxcycle=250,gdiis) iop(1/8=18) freq=noraman temp=233.15

#P Geom=AllCheck Guess=TChe ck SCRF=Check Test GenChk RPBE/PBE/3-21G\*/Auto

Freq

-----  
Pointgroup= C1    Stoichiometry= C57H33F18N2O6P    C1[X(C57H33F18N2O6P)]    #Atoms= 117

Charge= 0    Multiplicity = 1

-----  
SCF Energy= -4860.61696952    Predicted Change= -3.248928D-09-----  
Optimization completed.    {Found    2    times}

Item    Max Val.    Criteria    Pass?    RMS Val.    Criteria    Pass?

Force    0.00001 || 0.00045    [ YES ]    0.00000 || 0.00030    [ YES ]

Displ    0.00123 || 0.00180    [ YES ]    0.00123 || 0.00180    [ YES ]

| Atomic<br>Type | Coordinates (Angstroms) |           |           |
|----------------|-------------------------|-----------|-----------|
|                | X                       | Y         | Z         |
| C              | 2.890137                | -3.845258 | -0.306507 |
| C              | 4.207224                | -4.108169 | 0.135388  |
| C              | 4.424048                | -5.248501 | 0.898792  |
| C              | 3.366512                | -6.144508 | 1.253730  |
| C              | 2.061453                | -5.893482 | 0.874249  |
| C              | 1.810216                | -4.737607 | 0.082784  |
| C              | 0.615402                | -4.201639 | -0.419200 |
| C              | -0.775107               | -4.690056 | -0.439506 |
| C              | -1.163219               | -4.921592 | -1.948070 |
| O              | -0.900111               | -3.706223 | -2.714865 |
| C              | 0.507225                | -3.335138 | -2.750226 |
| C              | 0.568785                | -2.106930 | -3.650474 |
| C              | 0.922009                | -3.005401 | -1.231967 |
| N              | 2.373878                | -2.806846 | -1.044117 |
| C              | 3.151288                | -1.633528 | -1.417067 |
| N              | 2.363401                | -0.522617 | -1.542048 |
| C              | 2.831515                | 0.747687  | -1.936080 |
| O              | 4.390956                | -1.724254 | -1.556173 |
| C              | 1.869359                | 1.779280  | -2.026825 |
| C              | 2.246475                | 3.072030  | -2.382805 |
| C              | 1.205887                | 4.131627  | -2.539520 |
| F              | 1.722952                | 5.365356  | -2.156533 |
| F              | 0.781921                | 4.260217  | -3.854470 |
| C              | 3.585615                | 3.378708  | -2.643872 |
| C              | 4.540071                | 2.364889  | -2.548961 |
| C              | 5.987678                | 2.693250  | -2.701376 |
| F              | 6.573078                | 3.033368  | -1.489475 |
| F              | 6.150427                | 3.777313  | -3.554302 |
| F              | 6.687735                | 1.608889  | -3.205776 |
| C              | 4.177711                | 1.060323  | -2.206447 |
| F              | 0.091143                | 3.843676  | -1.768882 |
| H              | -2.247296               | -5.071279 | -2.015261 |
| H              | -0.598862               | -5.783755 | -2.349922 |
| H              | 1.148729                | -4.170140 | -3.093653 |
| H              | 1.607525                | -1.788172 | -3.820557 |
| H              | 0.103621                | -2.361461 | -4.616558 |
| H              | 0.002430                | -1.290361 | -3.173707 |
| H              | 5.001954                | -3.401436 | -0.091908 |
| H              | 5.437748                | -5.464807 | 1.248994  |
| H              | 3.602441                | -7.023764 | 1.858055  |
| H              | 1.237794                | -6.545828 | 1.172391  |
| H              | -1.432410               | -3.877291 | -0.060641 |
| H              | -0.919319               | -5.622561 | 0.129937  |
| H              | 0.334795                | -2.089253 | -0.968848 |
| H              | 1.353086                | -0.521664 | -1.206218 |
| H              | 0.826449                | 1.560082  | -1.786962 |
| H              | 3.881528                | 4.393849  | -2.909072 |
| H              | 4.933186                | 0.286656  | -2.110411 |
| C              | -0.985907               | 2.483887  | 1.470999  |
| C              | -2.453681               | 2.236054  | 1.629830  |
| C              | -0.104784               | 1.413745  | 1.625180  |
| O              | -0.620435               | 0.097456  | 1.718085  |
| C              | 1.313009                | 1.626505  | 1.660713  |

|   |           |           |           |
|---|-----------|-----------|-----------|
| C | 2.255839  | 0.499781  | 1.917035  |
| C | 1.817088  | 2.911621  | 1.481349  |
| C | 0.944798  | 4.000115  | 1.204510  |
| C | -0.481481 | 3.801375  | 1.201195  |
| C | -3.195736 | 2.959975  | 2.628279  |
| C | -4.616403 | 2.745262  | 2.716013  |
| C | -5.247785 | 1.810352  | 1.850624  |
| C | -4.502320 | 1.068826  | 0.942035  |
| C | -5.212286 | 0.083538  | 0.074846  |
| C | -3.090674 | 1.280750  | 0.835642  |
| O | -2.378946 | 0.540124  | -0.125410 |
| C | 1.472780  | 5.295247  | 0.918527  |
| C | 0.621990  | 6.345124  | 0.619654  |
| C | -0.784469 | 6.145059  | 0.597468  |
| C | -1.327604 | 4.902145  | 0.881562  |
| C | -2.580815 | 3.843863  | 3.564220  |
| C | -3.343249 | 4.505763  | 4.513420  |
| C | -4.750282 | 4.317615  | 4.576856  |
| C | -5.375281 | 3.448116  | 3.700211  |
| C | 3.558433  | 0.517294  | 1.368865  |
| C | 4.459986  | -0.518619 | 1.638840  |
| C | 5.858144  | -0.456898 | 1.116673  |
| F | 6.311039  | -1.732009 | 0.765051  |
| F | 6.745965  | 0.021820  | 2.067228  |
| F | 5.951899  | 0.373357  | 0.010473  |
| C | 4.088005  | -1.596036 | 2.446607  |
| C | 2.798566  | -1.628283 | 2.977990  |
| C | 2.348380  | -2.825893 | 3.746323  |
| F | 1.767675  | -3.783883 | 2.920264  |
| F | 1.402907  | -2.476126 | 4.695844  |
| F | 3.426505  | -3.432537 | 4.378748  |
| C | 1.889631  | -0.595051 | 2.731388  |
| C | -4.736331 | -1.231227 | -0.117488 |
| C | -5.497036 | -2.144335 | -0.859154 |
| C | -5.049861 | -3.564446 | -0.956771 |
| F | -5.631894 | -4.192967 | -2.049623 |
| F | -5.370734 | -4.306765 | 0.167102  |
| F | -3.660554 | -3.639926 | -1.103391 |
| C | -6.709482 | -1.770844 | -1.443227 |
| C | -7.167193 | -0.463281 | -1.279802 |
| C | -8.404621 | -0.016211 | -1.982892 |
| F | -9.283910 | -1.080113 | -2.138627 |
| F | -8.143684 | 0.488730  | -3.247366 |
| F | -9.035826 | 0.989817  | -1.261790 |
| P | -1.219030 | -0.565135 | 0.302754  |
| C | -6.433026 | 0.454713  | -0.522080 |
| O | -0.183259 | -0.434986 | -0.829894 |
| O | -1.783016 | -1.916865 | 0.653601  |
| H | 2.893007  | 3.097236  | 1.547286  |
| H | -6.324220 | 1.635345  | 1.943335  |
| H | 2.558452  | 5.435479  | 0.918856  |
| H | 1.029886  | 7.331948  | 0.383804  |
| H | -1.442774 | 6.979920  | 0.340288  |
| H | -2.407937 | 4.744005  | 0.851813  |
| H | -1.499049 | 3.986172  | 3.524643  |
| H | -2.856976 | 5.176272  | 5.228098  |

|   |           |           |           |
|---|-----------|-----------|-----------|
| H | -5.333410 | 4.852505  | 5.331909  |
| H | -6.455755 | 3.278143  | 3.751811  |
| H | 3.868854  | 1.313361  | 0.688921  |
| H | 4.787618  | -2.406108 | 2.654318  |
| H | 0.892624  | -0.650631 | 3.164988  |
| H | -3.772030 | -1.554990 | 0.289873  |
| H | -7.290448 | -2.490306 | -2.020849 |
| H | -6.817804 | 1.470640  | -0.404817 |

-----  
Statistical Thermodynamic Analysis

Temperature= 233.150 Kelvin    Pressure= 1.00000 Atm

```
SCF Energy= -4860.61696952    Predicted Change= -3.248928D-09
Zero-point correction (ZPE)= -4859.8085    0.80840
Internal Energy (U)= -4859.7640    0.85295
Enthalpy (H)= -4859.7632    0.85369
Gibbs Free Energy (G)= -4859.8826    0.73429
```

-----  
Frequencies --    8.0383            15.0282            17.0079

PBE-D3BJ = -0.213657

PBE/6-311++G(2df,p) = -4887.924798

PBE/6-31+G(d,p) = -4886.641083

PBE/6-31+G(d,p)/SMD(Toluene) = -4886.684398

**Product**-----  
Using Gaussian 09: AM64L-G09RevD.01 24-Apr-2013

```
#pbepbe/3-21G*/auto gffprint gffinput scf=(direct,tight,maxcycle=300,xqc)
opt=(maxcycle=250,gdiis) iop(1/8=18) freq=noraman temp=233.15
#P Geom=AllCheck Guess=TCheck SCRF=Check Test GenChk RPBEPBE/3-21G*/Auto
Freq
```

-----  
Pointgroup= C1    Stoichiometry= C21H16F6N2O2    C1[X(C21H16F6N2O2)]    #Atoms= 47  
Charge = 0            Multiplicity = 1-----  
SCF Energy= -1658.20013650    Predicted Change= -5.807370D-09

```
Optimization completed.            {Found    1    times}
Item    Max Val.    Criteria    Pass?    RMS Val.    Criteria    Pass?
Force    0.00001 || 0.00045    [ YES ]    0.00000 || 0.00030    [ YES ]
Displ    0.00191 || 0.00180    [ NO ]    0.00191 || 0.00180    [ YES ]
```

| Atomic Type | Coordinates (Angstroms) |           |           |
|-------------|-------------------------|-----------|-----------|
|             | X                       | Y         | Z         |
| C           | -4.693659               | 2.712322  | -0.427850 |
| C           | -3.950752               | 3.778207  | -0.948081 |
| C           | -2.585040               | 3.626892  | -1.267869 |
| C           | -1.922744               | 2.410416  | -1.049584 |
| C           | -2.640858               | 1.342521  | -0.487014 |
| C           | -4.037292               | 1.489981  | -0.205555 |
| N           | -2.288622               | 0.004665  | -0.163921 |
| C           | -0.989927               | -0.573372 | -0.111657 |

|   |           |           |           |
|---|-----------|-----------|-----------|
| N | -0.004766 | 0.385507  | 0.095553  |
| C | 1.382272  | 0.146682  | 0.089554  |
| O | -0.790250 | -1.803193 | -0.204203 |
| C | -3.468797 | -0.676031 | 0.258947  |
| C | -4.523940 | 0.207206  | 0.258924  |
| C | -3.587827 | -2.129104 | 0.649353  |
| C | -3.566531 | -3.058606 | -0.578625 |
| O | -4.826411 | -2.306155 | 1.445637  |
| C | -5.996547 | -1.718292 | 0.760223  |
| C | -5.897549 | -0.178935 | 0.730059  |
| C | 1.967449  | -1.114808 | -0.140119 |
| C | 3.355891  | -1.255286 | -0.162240 |
| C | 3.942382  | -2.586763 | -0.502572 |
| F | 3.131583  | -3.608700 | -0.034211 |
| F | 5.206189  | -2.713734 | 0.058164  |
| F | 4.077598  | -2.760831 | -1.871048 |
| C | 4.198031  | -0.165606 | 0.064163  |
| C | 3.624698  | 1.083319  | 0.312180  |
| C | 4.498036  | 2.249510  | 0.639646  |
| F | 5.691611  | 2.167529  | -0.060856 |
| F | 4.814812  | 2.307454  | 1.987635  |
| F | 3.859960  | 3.440636  | 0.313210  |
| C | 2.239835  | 1.243243  | 0.318102  |
| H | -5.758964 | 2.817435  | -0.207582 |
| H | -4.437616 | 4.740301  | -1.130065 |
| H | -2.033499 | 4.460965  | -1.709397 |
| H | -0.883784 | 2.298306  | -1.365493 |
| H | -0.314791 | 1.329926  | 0.353607  |
| H | -2.776026 | -2.422065 | 1.337445  |
| H | -3.786484 | -4.089777 | -0.253474 |
| H | -2.561451 | -3.012827 | -1.020083 |
| H | -4.311962 | -2.746505 | -1.328693 |
| H | -6.862010 | -2.053548 | 1.353668  |
| H | -6.092814 | -2.101364 | -0.273772 |
| H | -6.073301 | 0.230552  | 1.744121  |
| H | -6.675956 | 0.224062  | 0.054742  |
| H | 1.321917  | -1.978802 | -0.279402 |
| H | 5.280688  | -0.289314 | 0.050677  |
| H | 1.834494  | 2.244069  | 0.484866  |

-----  
Statistical Thermodynamic Analysis

Temperature= 233.150 Kelvin    Pressure= 1.00000 Atm

---



---

|                              |                |                   |               |
|------------------------------|----------------|-------------------|---------------|
| SCF Energy=                  | -1658.20013650 | Predicted Change= | -5.807370D-09 |
| Zero-point correction (ZPE)= | -1657.8578     |                   | 0.34223       |
| Internal Energy (U)=         | -1657.8412     |                   | 0.35890       |
| Enthalpy (H)=                | -1657.8404     |                   | 0.35964       |
| Gibbs Free Energy (G)=       | -1657.8991     |                   | 0.30099       |

---

Frequencies --    14.7517                    21.1263                    29.7457

PBE-D3BJ = -0.06302544

PBE/6-311++G(2df,p) = -1667.622795

PBE/6-31+G(d,p) = -1667.175630

PBE/6-31+G(d,p)/SMD(Toluene) = -1667.198865

**Phosphate Acetal A**

-----  
 Using Gaussian 09: AM64L-G09RevD.01 24-Apr-2013  
 =====

```
# pbepbe/6-31G*/auto EmpiricalDispersion=GD3BJ gfpinput gfinput
scf=(direct,tight,maxcycle=300,xqc) opt=(maxcycle=250,gdiis) freq=noraman
iop(1/8=18) Temperature=233.15 SCRF=(SMD,SOLVENT=Toluene)
#N Geom=AllCheck Guess=TCheck SCRF=Check Test GenChk RPBEPBE/6-31G(d)/Auto
Freq
```

-----  
 Pointgroup= C1 Stoichiometry= C57H33F18N2O6P C1[X(C57H33F18N2O6P)] #Atoms= 117  
 Charge = 0 Multiplicity = 1  
 -----

SCF Energy= -4886.68643023 Predicted Change= -3.840268D-08  
 =====

```
Optimization completed.      {Found      1      times}
Item  Max Val.  Criteria  Pass?  RMS Val.  Criteria  Pass?
Force  0.00002 || 0.00045 [ YES ]   0.00000 || 0.00030 [ YES ]
Displ  0.00500 || 0.00180 [ NO ]    0.00500 || 0.00180 [ YES ]
```

-----  
 Atomic Coordinates (Angstroms)  
 Type X Y Z  
 -----

|   |           |           |           |
|---|-----------|-----------|-----------|
| C | 1.273007  | 3.854743  | 1.163838  |
| C | 2.053970  | 2.688414  | 1.353671  |
| C | 1.499262  | 1.411358  | 1.415080  |
| C | 2.385646  | 0.231667  | 1.598907  |
| C | 0.072477  | 1.333580  | 1.318029  |
| O | -0.522895 | 0.054442  | 1.308126  |
| C | -0.761788 | 2.452978  | 1.293715  |
| C | -2.235818 | 2.299087  | 1.457206  |
| C | -0.160904 | 3.751680  | 1.136156  |
| C | -2.959631 | 1.464654  | 0.611640  |
| O | -2.275411 | 0.809024  | -0.421069 |
| C | -4.369394 | 1.257264  | 0.709949  |
| C | -5.080096 | 0.267937  | -0.136853 |
| C | -5.045443 | 1.964011  | 1.698561  |
| C | -4.370610 | 2.811122  | 2.614602  |
| C | -2.939181 | 2.960763  | 2.529271  |
| C | -0.921948 | 4.931671  | 0.899155  |
| C | -0.293451 | 6.152795  | 0.716477  |
| C | 1.121271  | 6.256826  | 0.765393  |
| C | 1.889821  | 5.127510  | 0.984263  |
| C | -5.085695 | 3.486237  | 3.646040  |
| C | -4.419817 | 4.254085  | 4.584241  |
| C | -3.006773 | 4.363604  | 4.530357  |
| C | -2.283559 | 3.734192  | 3.529617  |
| C | 3.723761  | 0.293552  | 1.154029  |
| C | 4.599361  | -0.781441 | 1.338879  |
| C | 6.048615  | -0.639468 | 0.940045  |
| F | 6.803986  | -0.249867 | 2.011693  |
| F | 6.235324  | 0.299274  | -0.027250 |
| F | 6.576474  | -1.808720 | 0.495547  |

|   |           |           |           |
|---|-----------|-----------|-----------|
| C | 4.165589  | -1.959585 | 1.959982  |
| C | 2.846062  | -2.019748 | 2.429055  |
| C | 2.403623  | -3.248032 | 3.184238  |
| F | 2.758374  | -4.396628 | 2.544974  |
| F | 1.050972  | -3.287744 | 3.367909  |
| F | 2.970317  | -3.300658 | 4.423066  |
| C | 1.967217  | -0.942221 | 2.262082  |
| C | -6.075081 | -0.542233 | 0.449079  |
| C | -6.745378 | -1.513395 | -0.304036 |
| C | -7.706812 | -2.450405 | 0.381219  |
| F | -7.050746 | -3.545952 | 0.871908  |
| F | -8.663579 | -2.909003 | -0.468050 |
| F | -8.333940 | -1.861762 | 1.434466  |
| C | -6.424537 | -1.721468 | -1.652417 |
| C | -5.438303 | -0.919770 | -2.237739 |
| C | -4.981178 | -1.188172 | -3.649093 |
| F | -4.712931 | -0.040612 | -4.324633 |
| F | -5.897973 | -1.888206 | -4.365790 |
| F | -3.825654 | -1.924686 | -3.646019 |
| P | -1.269116 | -0.430185 | -0.067751 |
| O | -2.107608 | -1.639851 | 0.558501  |
| C | -4.778776 | 0.073081  | -1.499721 |
| O | -0.461429 | -0.713867 | -1.294514 |
| C | 3.803613  | -3.749361 | -1.122790 |
| C | 5.185003  | -3.880558 | -1.327001 |
| C | 5.781980  | -5.084373 | -0.930922 |
| C | 5.031524  | -6.127361 | -0.347749 |
| C | 3.654772  | -5.990708 | -0.148240 |
| C | 3.026882  | -4.794061 | -0.539756 |
| C | 1.655455  | -4.330838 | -0.451635 |
| C | 0.503921  | -5.106650 | 0.126971  |
| C | -0.681523 | -4.278957 | 0.616137  |
| O | -1.274290 | -3.604243 | -0.519286 |
| C | -2.413555 | -2.855611 | -0.290013 |
| C | -3.550232 | -3.538367 | 0.448771  |
| C | 1.632392  | -3.062300 | -0.971650 |
| N | 2.923496  | -2.676366 | -1.382798 |
| C | 3.336737  | -1.406103 | -1.847286 |
| N | 2.309293  | -0.491602 | -1.994678 |
| C | 2.453444  | 0.896898  | -2.131457 |
| O | 4.523507  | -1.155409 | -2.071424 |
| C | 1.282716  | 1.645578  | -2.374695 |
| C | 1.328481  | 3.042692  | -2.393758 |
| C | 0.050734  | 3.791093  | -2.674721 |
| F | -0.309853 | 3.690575  | -3.987314 |
| F | 0.151999  | 5.116362  | -2.388374 |
| F | -0.993285 | 3.292274  | -1.949307 |
| C | 2.525480  | 3.730918  | -2.161482 |
| C | 3.683970  | 2.977402  | -1.931462 |
| C | 4.948608  | 3.667932  | -1.498301 |
| F | 5.006268  | 4.962929  | -1.905370 |
| F | 6.066809  | 3.041114  | -1.940059 |
| F | 5.035950  | 3.689946  | -0.119318 |
| C | 3.673096  | 1.576700  | -1.941442 |
| H | 3.135639  | 2.814238  | 1.446524  |
| H | -6.132546 | 1.860473  | 1.785385  |

|   |           |           |           |
|---|-----------|-----------|-----------|
| H | -2.010455 | 4.862328  | 0.834320  |
| H | -0.894920 | 7.045130  | 0.516220  |
| H | 1.601836  | 7.228469  | 0.613775  |
| H | 2.983768  | 5.181239  | 0.988242  |
| H | -6.174421 | 3.370975  | 3.686999  |
| H | -4.977197 | 4.763866  | 5.376264  |
| H | -2.478868 | 4.947538  | 5.290976  |
| H | -1.195330 | 3.822131  | 3.511428  |
| H | 4.091857  | 1.183993  | 0.641749  |
| H | 4.839937  | -2.812461 | 2.073132  |
| H | 0.954868  | -1.018800 | 2.658146  |
| H | -6.303446 | -0.433770 | 1.513028  |
| H | -6.928685 | -2.498124 | -2.232459 |
| H | -4.027596 | 0.694069  | -1.991303 |
| H | -2.726109 | -2.495150 | -1.283084 |
| H | -0.358465 | -3.533105 | 1.363037  |
| H | -1.421295 | -4.951628 | 1.086857  |
| H | -3.291890 | -3.742519 | 1.499732  |
| H | -4.444446 | -2.899415 | 0.435116  |
| H | -3.792050 | -4.487809 | -0.056531 |
| H | 5.765918  | -3.068498 | -1.760713 |
| H | 6.859532  | -5.211944 | -1.077167 |
| H | 5.534785  | -7.052422 | -0.048122 |
| H | 3.072484  | -6.798989 | 0.306997  |
| H | 0.865790  | -5.678799 | 1.001847  |
| H | 0.136053  | -5.858470 | -0.598901 |
| H | 0.772661  | -2.408967 | -1.090738 |
| H | 1.337440  | -0.787310 | -1.846099 |
| H | 0.330968  | 1.126488  | -2.513322 |
| H | 2.548451  | 4.821431  | -2.136777 |
| H | 4.587303  | 1.010846  | -1.765961 |

-----  
Statistical Thermodynamic Analysis

Temperature= 233.150 Kelvin Pressure= 1.00000 Atm

-----  
SCF Energy= -4886.68643023 Predicted Change= -3.840268D-08

Zero-point correction (ZPE)= -4885.8961 0.79029

Internal Energy (U)= -4885.8504 0.83599

Enthalpy (H)= -4885.8496 0.83673

Gibbs Free Energy (G)= -4885.9712 0.71515  
-----

Frequencies -- 9.1731 15.5979 19.2492

PBE-D3BJ/6-311++G(2df,p) = -4888.179618

PBE-D3BJ/6-311++G(2df,p)/SMD(Toluene) = -4888.217163

PBE/def2-TZVPP = -4887.60587851624

**Phosphate Acetal B**  
-----Using Gaussian 09: AM64L-G09RevD.01 24-Apr-2013  
-----# pbepbe/6-31G\*/auto EmpiricalDispersion=GD3BJ gfprint gfinput  
scf=(direct,tight,maxcycle=300,xqc) opt=(maxcycle=250,gdiis) freq=noraman  
iop(1/8=18) Temperature=233.15 SCRF=(SMD,SOLVENT=Toluene)



#N Geom=AllCheck Guess=TCheck SCRF=Check Test GenChk RPBEPBE/6-31G(d)/Auto  
Freq

Pointgroup= C1 Stoichiometry= C57H33F18N2O6P C1[X(C57H33F18N2O6P)] #Atoms= 117  
Charge = 0 Multiplicity = 1

SCF Energy= -4886.68579333 Predicted Change= -2.866680D-08

Optimization completed. {Found 1 times}  
Item Max Val. Criteria Pass? RMS Val. Criteria Pass?  
Force 0.00002 || 0.00045 [ YES ] 0.00000 || 0.00030 [ YES ]  
Displ 0.00404 || 0.00180 [ NO ] 0.00404 || 0.00180 [ YES ]

Atomic Coordinates (Angstroms)  
Type X Y Z

|   |           |           |           |
|---|-----------|-----------|-----------|
| C | -3.143440 | -1.567532 | 2.072241  |
| C | -3.627903 | -0.267568 | 1.769744  |
| C | -2.770046 | 0.807912  | 1.567298  |
| C | -3.283420 | 2.125412  | 1.119320  |
| C | -1.377183 | 0.570512  | 1.749447  |
| O | -0.480011 | 1.614716  | 1.427496  |
| C | -0.842277 | -0.646583 | 2.161515  |
| C | 0.598687  | -0.733821 | 2.524264  |
| C | -1.729993 | -1.778051 | 2.256730  |
| C | 1.611948  | -0.316839 | 1.656918  |
| O | 1.321462  | 0.114149  | 0.355708  |
| C | 3.000032  | -0.423214 | 1.982937  |
| C | 4.104672  | 0.067383  | 1.116907  |
| C | 3.336729  | -0.986406 | 3.208437  |
| C | 2.359368  | -1.373708 | 4.158010  |
| C | 0.966490  | -1.203420 | 3.840821  |
| C | -1.261908 | -3.106738 | 2.463217  |
| C | -2.149227 | -4.170050 | 2.505569  |
| C | -3.544810 | -3.956524 | 2.366045  |
| C | -4.031004 | -2.679588 | 2.151790  |
| C | 2.738018  | -1.871875 | 5.437968  |
| C | 1.782168  | -2.167599 | 6.392851  |
| C | 0.410751  | -1.954013 | 6.102440  |
| C | 0.011685  | -1.483106 | 4.861546  |
| C | -2.780870 | 3.340251  | 1.630642  |
| C | -3.288828 | 4.562846  | 1.175745  |
| C | -2.690696 | 5.850170  | 1.682192  |
| F | -3.596962 | 6.863630  | 1.693896  |
| F | -1.652582 | 6.264220  | 0.888329  |
| F | -2.194029 | 5.724663  | 2.940974  |
| C | -4.300096 | 4.609044  | 0.204166  |
| C | -4.803394 | 3.405532  | -0.298946 |
| C | -5.891043 | 3.391084  | -1.344538 |
| F | -5.502178 | 2.701524  | -2.453615 |
| F | -6.240415 | 4.643340  | -1.742487 |
| F | -7.017579 | 2.780975  | -0.879841 |
| C | -4.304719 | 2.176429  | 0.153660  |
| C | 5.231450  | -0.751452 | 0.913638  |
| C | 6.363302  | -0.258237 | 0.252084  |
| C | 7.594544  | -1.118974 | 0.122865  |

|   |           |           |           |
|---|-----------|-----------|-----------|
| F | 7.300460  | -2.446593 | 0.125419  |
| F | 8.459007  | -0.902029 | 1.157216  |
| F | 8.284116  | -0.851462 | -1.023152 |
| C | 6.391229  | 1.055786  | -0.225247 |
| C | 5.264321  | 1.869544  | -0.037855 |
| C | 5.327937  | 3.285546  | -0.550044 |
| F | 4.191274  | 3.991534  | -0.292777 |
| F | 5.522219  | 3.314219  | -1.905040 |
| F | 6.364990  | 3.973644  | 0.000254  |
| P | 0.235743  | 1.283969  | -0.017652 |
| O | 1.119195  | 2.595532  | -0.239747 |
| C | 4.126010  | 1.386057  | 0.619762  |
| O | -0.698097 | 0.852330  | -1.108219 |
| C | 2.904420  | -1.984406 | -2.439327 |
| C | 3.608631  | -3.099870 | -1.963706 |
| C | 5.003516  | -3.076374 | -2.084853 |
| C | 5.677750  | -1.979586 | -2.664424 |
| C | 4.970643  | -0.865251 | -3.122292 |
| C | 3.567651  | -0.858478 | -3.012042 |
| C | 2.554418  | 0.103318  | -3.396262 |
| C | 2.798444  | 1.478126  | -3.951346 |
| C | 2.645118  | 2.559595  | -2.881151 |
| O | 1.233581  | 2.749462  | -2.621117 |
| C | 0.964081  | 3.468049  | -1.478574 |
| C | -0.424348 | 4.063642  | -1.541581 |
| C | 1.341460  | -0.442932 | -3.058401 |
| N | 1.524740  | -1.703615 | -2.460769 |
| C | 0.517158  | -2.578207 | -1.988675 |
| N | -0.689184 | -1.938054 | -1.773247 |
| C | -1.934623 | -2.553699 | -1.594736 |
| O | 0.733040  | -3.779201 | -1.810827 |
| C | -2.102501 | -3.941071 | -1.415205 |
| C | -3.394300 | -4.467937 | -1.285894 |
| C | -3.542487 | -5.947275 | -1.034473 |
| F | -2.652175 | -6.677401 | -1.758008 |
| F | -4.789586 | -6.397338 | -1.342357 |
| F | -3.324527 | -6.259936 | 0.280329  |
| C | -4.528743 | -3.651533 | -1.325271 |
| C | -4.349963 | -2.270517 | -1.497966 |
| C | -5.567037 | -1.384881 | -1.501790 |
| F | -6.036312 | -1.163932 | -0.228912 |
| F | -6.595378 | -1.936599 | -2.196343 |
| F | -5.321053 | -0.156170 | -2.040126 |
| C | -3.073525 | -1.718206 | -1.627726 |
| H | -4.706128 | -0.121845 | 1.656288  |
| H | 4.394195  | -1.076639 | 3.478875  |
| H | -0.187818 | -3.285372 | 2.557825  |
| H | -1.768988 | -5.188330 | 2.631794  |
| H | -4.228988 | -4.809238 | 2.392149  |
| H | -5.100047 | -2.505341 | 1.992565  |
| H | 3.804632  | -1.999295 | 5.653481  |
| H | 2.081058  | -2.545532 | 7.375591  |
| H | -0.343898 | -2.154784 | 6.869619  |
| H | -1.049101 | -1.313871 | 4.667245  |
| H | -1.998857 | 3.332486  | 2.392979  |
| H | -4.688513 | 5.565985  | -0.151314 |

|   |           |           |           |
|---|-----------|-----------|-----------|
| H | -4.701093 | 1.249620  | -0.266354 |
| H | 5.218429  | -1.785930 | 1.266508  |
| H | 7.275964  | 1.441200  | -0.739529 |
| H | 3.269923  | 2.046068  | 0.774446  |
| H | 1.741613  | 4.221709  | -1.263479 |
| H | 3.076916  | 3.521392  | -3.216989 |
| H | 3.149822  | 2.239996  | -1.956634 |
| H | -0.663954 | 4.587570  | -0.604634 |
| H | -0.455855 | 4.794328  | -2.366714 |
| H | -1.174627 | 3.281878  | -1.736528 |
| H | 3.083043  | -3.952951 | -1.533550 |
| H | 5.583489  | -3.930863 | -1.722395 |
| H | 6.768503  | -1.995977 | -2.736808 |
| H | 5.497080  | -0.007673 | -3.555581 |
| H | 2.115521  | 1.710475  | -4.788306 |
| H | 3.826105  | 1.545471  | -4.350085 |
| H | 0.347016  | -0.030793 | -3.201652 |
| H | -0.679252 | -0.910527 | -1.655333 |
| H | -1.225942 | -4.587826 | -1.382775 |
| H | -5.530020 | -4.078525 | -1.235485 |
| H | -2.947739 | -0.641499 | -1.773160 |

-----  
Statistical Thermodynamic Analysis

Temperature= 233.150 Kelvin    Pressure= 1.00000 Atm

```

SCF Energy= -4886.68579333    Predicted Change= -2.866680D-08
Zero-point correction (ZPE)= -4885.8956    0.79009
Internal Energy (U)= -4885.8501    0.83559
Enthalpy (H)= -4885.8494    0.83633
Gibbs Free Energy (G)= -4885.9706    0.71514

```

-----  
Frequencies --    9.7251            14.1752            16.7634

PBE-D3BJ/6-311++G(2df,p) = -4888.177993

PBE-D3BJ/6-311++G(2df,p)/SMD(Toluene) = -4888.215866

PBE/def2-TZVPP = -4887.60449602910

**Phosphate Acetal C**-----  
Using Gaussian 09: AM64L-G09RevD.01 24-Apr-2013

```

# pbepbe/6-31G*/auto EmpiricalDispersion=GD3BJ gfpint gfinput
scf=(direct,tight,maxcycle=300,xqc) opt=(maxcycle=250,gdiis) freq=noraman
iop(1/8=18) Temperature=233.15 SCRF=(SMD,SOLVENT=Toluene)
#N Geom=AllCheck Guess=TCheck SCRF=Check Test GenChk RPBEPBE/6-31G(d)/Auto
Freq

```

-----  
Pointgroup= C1    Stoichiometry= C57H33F18N2O6P    C1[X(C57H33F18N2O6P)]    #Atoms= 117  
Charge = 0            Multiplicity = 1-----  
SCF Energy= -4886.67982265    Predicted Change= -3.242316D-08-----  
Optimization completed.            {Found    1    times}  
Item    Max Val.    Criteria    Pass?    RMS Val.    Criteria    Pass?

Force 0.00004 || 0.00045 [ YES ] 0.00000 || 0.00030 [ YES ]  
 Displ 0.00476 || 0.00180 [ NO ] 0.00476 || 0.00180 [ YES ]

---

| Atomic<br>Type | Coordinates (Angstroms) |           |           |
|----------------|-------------------------|-----------|-----------|
|                | X                       | Y         | Z         |
| C              | 2.957627                | -0.446586 | 3.666514  |
| C              | 2.982343                | 0.832189  | 3.049296  |
| C              | 1.989910                | 1.234378  | 2.163236  |
| C              | 2.046315                | 2.565548  | 1.501473  |
| C              | 0.982627                | 0.282920  | 1.820489  |
| O              | -0.023208               | 0.690368  | 0.919674  |
| C              | 0.996528                | -1.040231 | 2.266096  |
| C              | 0.103065                | -2.029842 | 1.603032  |
| C              | 1.946630                | -1.399510 | 3.285419  |
| C              | -1.261686               | -1.768522 | 1.485649  |
| O              | -1.811062               | -0.669020 | 2.155816  |
| C              | -2.151511               | -2.585589 | 0.728284  |
| C              | -3.581797               | -2.230896 | 0.554721  |
| C              | -1.622777               | -3.693861 | 0.080168  |
| C              | -0.247358               | -4.027997 | 0.167362  |
| C              | 0.644730                | -3.189090 | 0.929464  |
| C              | 1.914769                | -2.658656 | 3.949688  |
| C              | 2.854418                | -2.972750 | 4.917892  |
| C              | 3.873557                | -2.048304 | 5.264854  |
| C              | 3.920262                | -0.808757 | 4.652066  |
| C              | 0.265493                | -5.167229 | -0.517939 |
| C              | 1.609730                | -5.484981 | -0.459115 |
| C              | 2.490336                | -4.658855 | 0.283090  |
| C              | 2.028085                | -3.531955 | 0.943712  |
| C              | 0.951195                | 3.448751  | 1.501920  |
| C              | 1.032216                | 4.671932  | 0.823892  |
| C              | -0.180397               | 5.568354  | 0.817619  |
| F              | -1.294124               | 4.888836  | 0.413085  |
| F              | -0.033408               | 6.631609  | -0.019635 |
| F              | -0.451910               | 6.061386  | 2.057276  |
| C              | 2.197768                | 5.042859  | 0.145279  |
| C              | 3.294008                | 4.170622  | 0.155665  |
| C              | 4.504736                | 4.496637  | -0.677577 |
| F              | 5.636342                | 3.924519  | -0.188800 |
| F              | 4.721072                | 5.835301  | -0.768261 |
| F              | 4.352953                | 4.034030  | -1.961288 |
| C              | 3.222812                | 2.940957  | 0.823092  |
| C              | -4.438873               | -1.985029 | 1.642296  |
| C              | -5.786386               | -1.664190 | 1.419269  |
| C              | -6.675571               | -1.349318 | 2.597246  |
| F              | -6.386642               | -2.133970 | 3.669162  |
| F              | -7.991458               | -1.522371 | 2.300268  |
| F              | -6.527533               | -0.052853 | 3.003280  |
| C              | -6.291359               | -1.545318 | 0.118024  |
| C              | -5.433950               | -1.782462 | -0.966205 |
| C              | -5.960975               | -1.614070 | -2.368458 |
| F              | -6.680125               | -0.457538 | -2.486375 |
| F              | -6.786407               | -2.629506 | -2.735662 |
| F              | -4.957028               | -1.554454 | -3.290582 |
| P              | -1.493590               | 0.869250  | 1.662446  |

|   |           |           |           |
|---|-----------|-----------|-----------|
| O | -2.430545 | 1.175094  | 0.405497  |
| C | -4.098076 | -2.139002 | -0.752250 |
| O | -1.558141 | 1.820478  | 2.811115  |
| C | -0.203934 | 1.816019  | -2.858510 |
| C | 1.029431  | 2.487805  | -2.824211 |
| C | 1.002447  | 3.887176  | -2.780411 |
| C | -0.214842 | 4.599452  | -2.762875 |
| C | -1.438151 | 3.927252  | -2.824612 |
| C | -1.442452 | 2.522412  | -2.902015 |
| C | -2.503856 | 1.545929  | -3.053651 |
| C | -3.977455 | 1.827878  | -3.006450 |
| C | -4.498034 | 1.762088  | -1.565742 |
| O | -3.742342 | 2.706477  | -0.773010 |
| C | -3.437640 | 2.323671  | 0.512027  |
| C | -4.604219 | 1.863997  | 1.365831  |
| C | -1.905654 | 0.311997  | -3.095321 |
| N | -0.516173 | 0.444024  | -2.945595 |
| C | 0.315702  | -0.684392 | -2.765279 |
| N | 1.431064  | -0.386852 | -2.002389 |
| C | 2.545592  | -1.196819 | -1.762232 |
| O | 0.027234  | -1.789775 | -3.221507 |
| C | 3.457879  | -0.760833 | -0.781116 |
| C | 4.611821  | -1.504561 | -0.518537 |
| C | 5.512760  | -1.113681 | 0.622675  |
| F | 6.813931  | -1.413664 | 0.372393  |
| F | 5.168869  | -1.776019 | 1.769110  |
| F | 5.449615  | 0.219918  | 0.906760  |
| C | 4.880272  | -2.686621 | -1.220493 |
| C | 3.953131  | -3.121043 | -2.177515 |
| C | 4.219119  | -4.413554 | -2.908905 |
| F | 4.722774  | -5.365155 | -2.065435 |
| F | 5.134964  | -4.253915 | -3.905073 |
| F | 3.096005  | -4.930025 | -3.471878 |
| C | 2.791054  | -2.396356 | -2.459024 |
| H | 3.781242  | 1.533268  | 3.313377  |
| H | -2.285079 | -4.335337 | -0.511454 |
| H | 1.131143  | -3.375757 | 3.690744  |
| H | 2.807708  | -3.942827 | 5.422922  |
| H | 4.614495  | -2.315236 | 6.024956  |
| H | 4.692318  | -0.079587 | 4.920708  |
| H | -0.430937 | -5.780617 | -1.099916 |
| H | 2.000907  | -6.352678 | -0.998954 |
| H | 3.556904  | -4.897738 | 0.310964  |
| H | 2.742554  | -2.897929 | 1.468973  |
| H | 0.039600  | 3.185423  | 2.047673  |
| H | 2.248294  | 5.992061  | -0.392158 |
| H | 4.078448  | 2.259685  | 0.801825  |
| H | -4.058380 | -2.055027 | 2.664453  |
| H | -7.334481 | -1.263517 | -0.047527 |
| H | -3.433457 | -2.312264 | -1.602082 |
| H | -2.894920 | 3.165051  | 0.964740  |
| H | -4.353979 | 0.742647  | -1.174721 |
| H | -5.573410 | 2.016655  | -1.517490 |
| H | -5.341092 | 2.682914  | 1.429171  |
| H | -5.097484 | 0.978694  | 0.940835  |
| H | -4.267672 | 1.626613  | 2.386759  |

|   |           |           |           |
|---|-----------|-----------|-----------|
| H | 1.988245  | 1.963533  | -2.863549 |
| H | 1.953213  | 4.425996  | -2.756512 |
| H | -0.199242 | 5.691328  | -2.692464 |
| H | -2.381952 | 4.480548  | -2.813402 |
| H | -4.545688 | 1.089427  | -3.597925 |
| H | -4.194830 | 2.824119  | -3.430901 |
| H | -2.331440 | -0.684087 | -3.194776 |
| H | 1.383071  | 0.475773  | -1.456437 |
| H | 3.252388  | 0.153320  | -0.215658 |
| H | 5.776747  | -3.272320 | -1.002949 |
| H | 2.061368  | -2.765007 | -3.179210 |

-----  
Statistical Thermodynamic Analysis

Temperature= 233.150 Kelvin Pressure= 1.00000 Atm

-----  
SCF Energy= -4886.67982265 Predicted Change= -3.242316D-08

Zero-point correction (ZPE)= -4885.8893 0.79044

Internal Energy (U)= -4885.8438 0.83594

Enthalpy (H)= -4885.8431 0.83668

Gibbs Free Energy (G)= -4885.9633 0.71642

-----  
Frequencies -- 14.8830 17.3626 20.3428

PBE-D3BJ/6-311++G(2df,p) = -4888.171483

PBE-D3BJ/6-311++G(2df,p)/SMD(Toluene) = -4888.210835

PBE/def2-TZVPP = -4887.59293040622

**Major-TS w/o urea**-----  
Using Gaussian 09: AM64L-G09RevD.01 24-Apr-2013-----  
# pbepbe/6-31G\*/auto EmpiricalDispersion=GD3BJ gfpint gfinput  
scf=(direct,tight,maxcycle=300,xqc)  
opt=(maxcycle=250,calcfc,ts,noeigentest,gdiiis) freq=norman  
SCRF=(SMD,SOLVENT=Toluene) iop(1/8=18) Temperature=233.15  
#N Geom=AllCheck Guess=TCheck SCRF=Check Test GenChk RPBEPBE/6-31G(d)/Auto  
Freq-----  
Pointgroup= C1 Stoichiometry= C57H33F18N2O6P C1[X(C57H33F18N2O6P)] #Atoms= 117

Charge = 0 Multiplicity = 1

-----  
SCF Energy= -4886.65573618 Predicted Change= -5.508857D-10-----  
Optimization completed. {Found 2 times}  
Item Max Val. Criteria Pass? RMS Val. Criteria Pass?  
Force 0.00000 || 0.00045 [ YES ] 0.00000 || 0.00030 [ YES ]  
Displ 0.00116 || 0.00180 [ YES ] 0.00116 || 0.00180 [ YES ]-----  
Atomic Coordinates (Angstroms)  
Type X Y Z  
-----  
C -0.977512 -4.057644 1.040751  
C -1.948986 -3.039039 1.186424  
C -1.612208 -1.712376 1.442152

|   |           |           |           |
|---|-----------|-----------|-----------|
| C | -2.703387 | -0.711271 | 1.550351  |
| C | -0.218469 | -1.392961 | 1.594469  |
| O | 0.125175  | -0.076091 | 1.834879  |
| C | 0.769425  | -2.385605 | 1.589143  |
| C | 2.192463  | -2.043979 | 1.861570  |
| C | 0.409801  | -3.736749 | 1.241730  |
| C | 2.822419  | -1.093417 | 1.064607  |
| O | 2.057363  | -0.392772 | 0.143933  |
| C | 4.222779  | -0.817727 | 1.138103  |
| C | 4.858018  | 0.126287  | 0.188660  |
| C | 4.961687  | -1.476316 | 2.113192  |
| C | 4.357440  | -2.385276 | 3.022966  |
| C | 2.950849  | -2.681214 | 2.905850  |
| C | 1.372004  | -4.767745 | 1.031788  |
| C | 0.978400  | -6.045337 | 0.667422  |
| C | -0.393314 | -6.362026 | 0.488655  |
| C | -1.352794 | -5.381787 | 0.669419  |
| C | 5.118405  | -3.016308 | 4.049046  |
| C | 4.520931  | -3.886850 | 4.943999  |
| C | 3.131170  | -4.154990 | 4.848086  |
| C | 2.364902  | -3.568649 | 3.853238  |
| C | -3.883589 | -0.903717 | 0.800584  |
| C | -4.967944 | -0.028823 | 0.916727  |
| C | -6.231014 | -0.288305 | 0.135961  |
| F | -7.193789 | -0.849534 | 0.921642  |
| F | -6.033663 | -1.130232 | -0.913545 |
| F | -6.766273 | 0.868215  | -0.359991 |
| C | -4.910098 | 1.066497  | 1.786849  |
| C | -3.739260 | 1.270326  | 2.531087  |
| C | -3.699470 | 2.442641  | 3.478458  |
| F | -4.024542 | 3.607079  | 2.839269  |
| F | -2.475148 | 2.621194  | 4.042091  |
| F | -4.596120 | 2.295861  | 4.494150  |
| C | -2.648244 | 0.397846  | 2.423055  |
| C | 5.828607  | 1.043742  | 0.631504  |
| C | 6.443832  | 1.921326  | -0.271674 |
| C | 7.433184  | 2.939734  | 0.234506  |
| F | 6.819452  | 4.102203  | 0.600367  |
| F | 8.356692  | 3.264298  | -0.713552 |
| F | 8.109737  | 2.489646  | 1.326881  |
| C | 6.095296  | 1.911859  | -1.628254 |
| C | 5.128062  | 0.999451  | -2.071569 |
| C | 4.781005  | 0.929124  | -3.536430 |
| F | 3.489837  | 0.541899  | -3.733506 |
| F | 5.567687  | 0.035527  | -4.201546 |
| F | 4.943341  | 2.133759  | -4.154320 |
| P | 1.102045  | 0.828271  | 0.787270  |
| O | 1.842363  | 1.822799  | 1.630449  |
| C | 4.518412  | 0.109810  | -1.179787 |
| O | 0.304807  | 1.299483  | -0.432565 |
| H | -3.001715 | -3.322120 | 1.095664  |
| H | 6.041413  | -1.301908 | 2.182971  |
| H | 2.434554  | -4.536524 | 1.131852  |
| H | 1.738391  | -6.815010 | 0.497939  |
| H | -0.686549 | -7.374332 | 0.192624  |
| H | -2.414209 | -5.593169 | 0.498176  |

|   |           |           |           |
|---|-----------|-----------|-----------|
| H | 6.188047  | -2.789004 | 4.120169  |
| H | 5.115014  | -4.361163 | 5.731696  |
| H | 2.657530  | -4.828386 | 5.569873  |
| H | 1.293178  | -3.775131 | 3.794272  |
| H | -3.954379 | -1.741171 | 0.104994  |
| H | -5.753756 | 1.756408  | 1.874812  |
| H | -1.753715 | 0.573635  | 3.021315  |
| H | 6.089964  | 1.084851  | 1.692650  |
| H | 6.568598  | 2.605109  | -2.327951 |
| H | 3.778941  | -0.605225 | -1.546563 |
| C | -3.328966 | 3.641617  | -1.049360 |
| C | -4.668554 | 3.533999  | -0.664432 |
| C | -5.246266 | 4.671013  | -0.084706 |
| C | -4.512255 | 5.860354  | 0.099923  |
| C | -3.171141 | 5.952017  | -0.295391 |
| C | -2.571558 | 4.828730  | -0.882922 |
| C | -1.200700 | 4.558176  | -1.346844 |
| C | -0.136867 | 4.217797  | 0.420509  |
| O | 0.315203  | 5.479878  | 0.481182  |
| C | 0.902008  | 5.816754  | -0.793254 |
| C | -0.239238 | 5.633618  | -1.828669 |
| C | -1.247974 | 3.227686  | -1.849899 |
| N | -2.462557 | 2.672248  | -1.623161 |
| C | -2.845926 | 1.287774  | -1.926044 |
| N | -1.779712 | 0.461242  | -1.795478 |
| C | -1.722675 | -0.910870 | -2.095595 |
| O | -4.002995 | 1.031757  | -2.245334 |
| C | -0.433811 | -1.480906 | -2.120521 |
| C | -0.282983 | -2.851723 | -2.344268 |
| C | 1.112036  | -3.417504 | -2.456856 |
| F | 1.655359  | -3.144740 | -3.679413 |
| F | 1.133044  | -4.766667 | -2.302179 |
| F | 1.957720  | -2.881043 | -1.530264 |
| C | -1.402659 | -3.679521 | -2.503713 |
| C | -2.677461 | -3.098881 | -2.467410 |
| C | -3.897054 | -3.981305 | -2.444843 |
| F | -3.685650 | -5.180131 | -3.046615 |
| F | -4.971413 | -3.399861 | -3.036558 |
| F | -4.266634 | -4.253007 | -1.146109 |
| C | -2.854604 | -1.718735 | -2.298237 |
| C | -0.991027 | 3.764054  | 1.542486  |
| H | 1.747743  | 5.135907  | -0.997250 |
| H | 1.267438  | 6.850254  | -0.718396 |
| H | -0.798011 | 6.576667  | -1.943227 |
| H | 0.185070  | 5.379637  | -2.813704 |
| H | -0.452556 | 2.654911  | -2.323456 |
| H | -5.234119 | 2.615409  | -0.818898 |
| H | -6.294509 | 4.631298  | 0.227108  |
| H | -4.999434 | 6.726854  | 0.557268  |
| H | -2.603332 | 6.875480  | -0.143215 |
| H | 0.543864  | 3.472434  | -0.014767 |
| H | -1.676396 | 4.544995  | 1.900258  |
| H | -0.317436 | 3.447590  | 2.361212  |
| H | -1.555702 | 2.868736  | 1.239933  |
| H | -0.937070 | 0.808330  | -1.247764 |
| H | 0.440822  | -0.847006 | -1.949000 |



|   |           |           |           |
|---|-----------|-----------|-----------|
| H | -1.283244 | -4.757305 | -2.628544 |
| H | -3.852028 | -1.278246 | -2.277737 |

-----  
Statistical Thermodynamic AnalysisTemperature= 233.150 Kelvin    Pressure= 1.00000 Atm  
=====

|                              |                |                   |               |
|------------------------------|----------------|-------------------|---------------|
| SCF Energy=                  | -4886.65573618 | Predicted Change= | -5.508857D-10 |
| Zero-point correction (ZPE)= | -4885.8675     |                   | 0.78815       |
| Internal Energy (U)=         | -4885.8219     |                   | 0.83375       |
| Enthalpy (H)=                | -4885.8212     |                   | 0.83448       |
| Gibbs Free Energy (G)=       | -4885.9428     |                   | 0.71287       |

-----  
Frequencies -- -199.2367            9.0986            12.7596

PBE-D3BJ/6-311++G(2df,p) = -4888.150191

PBE-D3BJ/6-311++G(2df,p)/SMD(Toluene) = -4888.194974

PBE/def2-TZVPP = -4887.58867816919

**Major-TS-Hbond-Substrate**  
-----Using Gaussian 09: AM64L-G09RevD.01 24-Apr-2013  
=====

```
#pbepbe/6-31G(d)/auto EmpiricalDispersion=GD3BJ
scf=(maxcycle=300,direct,tight) density=current
opt=(maxcycle=250,modredundant) iop(1/8=18) Temperature=233.15
SCRF=(SMD,SOLVENT=Toluene)
Modredundant Input: B    7    11 F
Modredundant Input:
--link 1--
#pbepbe/6-31G(d)/auto EmpiricalDispersion=GD3BJ
scf=(direct,tight,maxcycle=300,xqc)
opt=(nofreeze,maxcycle=250,ts,calcfc,noeigentest) iop(1/8=18) freq=noraman
Temperature=233.15 geom=check guess=read SCRFF=(SMD,SOLVENT=Toluene)
#P Geom=AllCheck Guess=TCheck SCRFF=Check Test GenChk RPBEPBE/6-31G(d)/Auto
Freq
```

-----  
Pointgroup= C1    Stoichiometry= C74H41F30N4O7P    C1[X(C74H41F30N4O7P)]    #Atoms= 157  
Charge = 0            Multiplicity = 1  
-----SCF Energy= -6920.20377045    Predicted Change= -1.879718D-09  
=====

|                         |          |          |                                        |
|-------------------------|----------|----------|----------------------------------------|
| Optimization completed. | {Found   | 2        | times}                                 |
| Item                    | Max Val. | Criteria | Pass?    RMS Val.    Criteria    Pass? |
| Force                   | 0.00001  | 0.00045  | [ YES ]    0.00000    0.00030 [ YES ]  |
| Displ                   | 0.00253  | 0.00180  | [ NO ]    0.00253    0.00180 [ YES ]   |

-----  
Atomic            Coordinates (Angstroms)  
Type            X            Y            Z  
-----

|   |           |          |          |
|---|-----------|----------|----------|
| C | -1.732883 | 2.169814 | 1.173436 |
| C | -2.964646 | 1.634830 | 1.561627 |
| C | -3.749733 | 2.426280 | 2.410951 |
| C | -3.307079 | 3.686215 | 2.861369 |
| C | -2.047295 | 4.184884 | 2.501178 |

|   |           |           |           |
|---|-----------|-----------|-----------|
| C | -1.245569 | 3.413975  | 1.649972  |
| C | 0.133081  | 3.586446  | 1.148821  |
| C | 0.810157  | 4.935886  | 0.939062  |
| C | 1.863163  | 5.163583  | 2.055984  |
| O | 1.404482  | 4.380515  | 3.179047  |
| C | 1.280559  | 3.101737  | 2.781684  |
| H | 2.134561  | 2.692231  | 2.220547  |
| C | 0.332096  | 2.476937  | 0.281142  |
| N | -0.731068 | 1.636190  | 0.316639  |
| C | -0.847918 | 0.445777  | -0.510917 |
| N | 0.334150  | -0.170318 | -0.645027 |
| C | 0.572982  | -1.277549 | -1.498870 |
| O | -1.933895 | 0.150365  | -1.032510 |
| C | -0.213185 | -2.434230 | -1.451564 |
| C | 0.163696  | -3.547741 | -2.213813 |
| C | -0.655655 | -4.802831 | -2.061518 |
| F | -1.966902 | -4.573998 | -2.359629 |
| F | -0.222212 | -5.813796 | -2.851402 |
| F | -0.622773 | -5.253222 | -0.767587 |
| C | 1.298964  | -3.513866 | -3.034293 |
| C | 2.058717  | -2.338091 | -3.089599 |
| C | 3.269794  | -2.222456 | -3.981220 |
| F | 3.029933  | -1.386506 | -5.031669 |
| F | 4.332913  | -1.693094 | -3.303628 |
| F | 3.658808  | -3.416490 | -4.493628 |
| C | 1.700930  | -1.220882 | -2.326908 |
| C | 0.609143  | 2.185569  | 3.736648  |
| H | 2.865547  | 4.816169  | 1.751187  |
| H | 1.924233  | 6.206456  | 2.396799  |
| H | -0.257294 | 2.650417  | 4.229654  |
| H | 1.354180  | 1.900973  | 4.502808  |
| H | 0.324250  | 1.258721  | 3.217674  |
| H | -3.302188 | 0.652282  | 1.230116  |
| H | -4.729358 | 2.053890  | 2.724676  |
| H | -3.955205 | 4.280533  | 3.512252  |
| H | -1.694313 | 5.150224  | 2.876188  |
| H | 1.287273  | 4.982044  | -0.052121 |
| H | 0.038147  | 5.719753  | 0.964572  |
| H | 1.170420  | 2.279138  | -0.381866 |
| H | 1.074949  | 0.032510  | 0.116340  |
| H | -1.076948 | -2.474806 | -0.785171 |
| H | 1.598466  | -4.394887 | -3.604448 |
| H | 2.288250  | -0.301220 | -2.366764 |
| C | 2.988276  | -4.780239 | 0.043953  |
| C | 2.113244  | -4.371302 | 1.081607  |
| C | 2.305837  | -3.187985 | 1.786958  |
| C | 1.232957  | -2.665856 | 2.669909  |
| C | 3.473113  | -2.411952 | 1.488714  |
| O | 3.716070  | -1.262173 | 2.227553  |
| C | 4.369575  | -2.763933 | 0.474067  |
| C | 5.459718  | -1.811964 | 0.117785  |
| C | 4.114195  | -3.949832 | -0.302839 |
| C | 5.105828  | -0.496199 | -0.182123 |
| O | 3.780307  | -0.101439 | -0.044533 |
| P | 3.303714  | 0.217591  | 1.545945  |
| C | 6.048993  | 0.488290  | -0.607712 |

|   |           |           |           |
|---|-----------|-----------|-----------|
| C | 5.548402  | 1.850301  | -0.918863 |
| C | 7.385219  | 0.127731  | -0.692569 |
| C | 7.817241  | -1.184999 | -0.354897 |
| C | 6.852068  | -2.170424 | 0.070439  |
| C | 4.882673  | -4.308727 | -1.448241 |
| C | 4.580677  | -5.444846 | -2.183175 |
| C | 3.496361  | -6.282081 | -1.814114 |
| C | 2.712589  | -5.949676 | -0.722954 |
| C | 9.195390  | -1.541145 | -0.410474 |
| C | 9.619511  | -2.805357 | -0.039082 |
| C | 8.675811  | -3.762773 | 0.413856  |
| C | 7.326198  | -3.453467 | 0.468071  |
| C | 1.481551  | -1.985624 | 3.879812  |
| C | 0.424571  | -1.416345 | 4.600508  |
| C | 0.706944  | -0.715239 | 5.905292  |
| F | 1.946895  | -0.149970 | 5.921871  |
| F | 0.645674  | -1.567633 | 6.965709  |
| F | -0.194249 | 0.282119  | 6.145674  |
| C | -0.896887 | -1.490747 | 4.134150  |
| C | -1.147529 | -2.185156 | 2.946254  |
| C | -2.532550 | -2.253176 | 2.362818  |
| F | -2.544913 | -1.702585 | 1.090320  |
| F | -3.449409 | -1.566235 | 3.086448  |
| F | -2.975714 | -3.526761 | 2.220787  |
| C | -0.099969 | -2.780997 | 2.231415  |
| C | 4.492457  | 2.006420  | -1.838504 |
| C | 3.933081  | 3.266398  | -2.071755 |
| C | 2.745355  | 3.419613  | -2.983897 |
| F | 1.628350  | 3.810812  | -2.273999 |
| F | 2.415154  | 2.259878  | -3.610835 |
| F | 2.941069  | 4.367253  | -3.933775 |
| C | 4.437354  | 4.401957  | -1.418447 |
| C | 5.499350  | 4.250492  | -0.518511 |
| C | 5.968285  | 5.448784  | 0.266458  |
| F | 7.241806  | 5.306778  | 0.711888  |
| F | 5.180789  | 5.655869  | 1.369965  |
| F | 5.910003  | 6.592675  | -0.468982 |
| C | 6.049756  | 2.984515  | -0.261016 |
| O | 1.780699  | 0.333855  | 1.429017  |
| O | 4.102908  | 1.296121  | 2.216062  |
| H | 1.239093  | -4.994165 | 1.299140  |
| H | 8.127635  | 0.861956  | -1.025330 |
| H | 5.704090  | -3.662825 | -1.764138 |
| H | 5.177841  | -5.688301 | -3.067686 |
| H | 3.269484  | -7.176070 | -2.403826 |
| H | 1.845269  | -6.560138 | -0.450245 |
| H | 9.915734  | -0.786279 | -0.745213 |
| H | 10.682211 | -3.064565 | -0.081704 |
| H | 9.016831  | -4.754162 | 0.729317  |
| H | 6.607883  | -4.194759 | 0.828087  |
| H | 2.504515  | -1.880972 | 4.244524  |
| H | -1.709567 | -1.004746 | 4.678704  |
| H | -0.313873 | -3.306335 | 1.296052  |
| H | 4.121550  | 1.130336  | -2.374710 |
| H | 4.008991  | 5.390303  | -1.610033 |
| H | 6.844604  | 2.873478  | 0.481339  |

|   |           |           |           |
|---|-----------|-----------|-----------|
| C | -5.413826 | 0.552032  | -1.151366 |
| N | -4.852386 | -0.717576 | -0.996578 |
| C | -5.519293 | -1.920525 | -0.736968 |
| H | -3.833965 | -0.790323 | -1.072450 |
| N | -4.425019 | 1.504663  | -1.375339 |
| H | -3.449989 | 1.176106  | -1.325047 |
| C | -4.570982 | 2.890929  | -1.412823 |
| O | -6.623208 | 0.795765  | -1.093632 |
| C | -4.742047 | -3.097805 | -0.698671 |
| H | -3.670078 | -3.052490 | -0.908183 |
| C | -5.337872 | -4.328295 | -0.405919 |
| C | -4.486188 | -5.574057 | -0.401702 |
| F | -4.258704 | -6.035394 | -1.664690 |
| F | -5.072683 | -6.587501 | 0.291881  |
| F | -3.265070 | -5.350522 | 0.161241  |
| C | -6.714348 | -4.422453 | -0.163385 |
| H | -7.176953 | -5.384386 | 0.064704  |
| C | -7.481110 | -3.252015 | -0.221583 |
| C | -8.954294 | -3.312204 | 0.100012  |
| F | -9.671556 | -2.414420 | -0.628216 |
| F | -9.189714 | -3.031897 | 1.415191  |
| F | -9.477417 | -4.546237 | -0.140699 |
| C | -6.907151 | -2.005921 | -0.501034 |
| H | -7.515440 | -1.102715 | -0.544984 |
| C | -3.378409 | 3.646421  | -1.466839 |
| H | -2.413886 | 3.134980  | -1.511873 |
| C | -3.421765 | 5.039202  | -1.453529 |
| C | -2.140882 | 5.829483  | -1.427017 |
| F | -1.966567 | 6.450357  | -0.216849 |
| F | -2.124436 | 6.810624  | -2.366881 |
| F | -1.038895 | 5.049325  | -1.632347 |
| C | -4.646623 | 5.723528  | -1.411993 |
| H | -4.680157 | 6.815497  | -1.400785 |
| C | -5.824353 | 4.967895  | -1.379498 |
| C | -7.160390 | 5.669855  | -1.401244 |
| F | -7.637680 | 5.797737  | -2.672713 |
| F | -7.083852 | 6.925543  | -0.878777 |
| F | -8.101755 | 4.989776  | -0.692360 |
| C | -5.807115 | 3.565633  | -1.376318 |
| H | -6.733063 | 2.992438  | -1.331095 |

-----  
Statistical Thermodynamic Analysis

Temperature= 233.150 Kelvin    Pressure= 1.00000 Atm

|                              |                |                   |               |
|------------------------------|----------------|-------------------|---------------|
| SCF Energy=                  | -6920.20377045 | Predicted Change= | -1.879718D-09 |
| Zero-point correction (ZPE)= | -6919.1769     |                   | 1.02678       |
| Internal Energy (U)=         | -6919.1118     |                   | 1.09195       |
| Enthalpy (H)=                | -6919.1110     |                   | 1.09269       |
| Gibbs Free Energy (G)=       | -6919.2769     |                   | 0.92678       |

-----  
Frequencies --    -261.3007            7.3033            10.0497

PBE-D3BJ/6-311++G(2df,p) = -6922.395297

PBE-D3BJ/6-311++G(2df,p)/SMD(Toluene) = -6922.448691

PBE/def2-TZVPP = -6921.70241879243

**Major Interaction**

-----  
 Using Gaussian 09: AM64L-G09RevD.01 24-Apr-2013  
 =====

```
# pbepbe/6-31G*/auto EmpiricalDispersion=GD3BJ gfprint gfinput
scf=(direct,tight,maxcycle=300,xqc) opt=(maxcycle=250,modredundant,gdiis)
freq=norman iop(1/8=18) Temperature=233.15 SCRF=(SMD,SOLVENT=Toluene)
Modredundant Input: X * B
Modredundant Input: X * F
Modredundant Input: X 50 A
Modredundant Input: X 51 A
Modredundant Input: X 52 A
Modredundant Input:
#N Geom=AllCheck Guess=TCheck SCRF=Check Test GenChk RPBEPBE/6-31G(d)/Auto
Freq
```

-----  
 Pointgroup= C1 Stoichiometry= C26H14F12 C1[X(C26H14F12)] #Atoms= 52  
 Charge = 0 Multiplicity = 1  
 =====

SCF Energy= -2195.10705501 Predicted Change= -4.405008D-07  
 =====

```
Optimization completed. {Found 1 times}
Item Max Val. Criteria Pass? RMS Val. Criteria Pass?
Force 0.00008 || 0.00045 [ YES ] 0.00002 || 0.00030 [ YES ]
Displ 0.00511 || 0.00180 [ NO ] 0.00511 || 0.00180 [ YES ]
```

-----

| Atomic Type | Coordinates (Angstroms) |           |           |
|-------------|-------------------------|-----------|-----------|
|             | X                       | Y         | Z         |
| C           | 1.070048                | 0.754271  | 2.392784  |
| C           | 1.026576                | 1.734348  | 1.388660  |
| C           | 2.089635                | 1.821287  | 0.478840  |
| C           | 1.956001                | 2.791699  | -0.666780 |
| F           | 1.674200                | 4.049062  | -0.234722 |
| F           | 3.073795                | 2.854687  | -1.432837 |
| F           | 0.922989                | 2.429957  | -1.499152 |
| C           | 3.205125                | 0.977991  | 0.572906  |
| C           | 3.250269                | 0.033503  | 1.605734  |
| C           | 4.437584                | -0.878823 | 1.785553  |
| F           | 5.060839                | -0.643543 | 2.976438  |
| F           | 4.060710                | -2.191557 | 1.803277  |
| F           | 5.363835                | -0.730659 | 0.805440  |
| C           | 2.189803                | -0.084532 | 2.510669  |
| H           | 0.156679                | 2.388240  | 1.298015  |
| H           | 4.015657                | 1.044359  | -0.154424 |
| H           | 2.224197                | -0.822708 | 3.317015  |
| C           | 1.580293                | -1.144278 | -1.912450 |
| C           | 0.231243                | -0.753460 | -1.718840 |
| C           | -0.607503               | -1.421268 | -0.834866 |
| C           | -1.945540               | -0.868364 | -0.509726 |
| C           | -0.088747               | -2.575703 | -0.167709 |
| C           | 1.214511                | -3.041847 | -0.350343 |
| C           | 2.101427                | -2.281220 | -1.196899 |
| C           | 3.493176                | -2.563012 | -1.311013 |

|   |           |           |           |
|---|-----------|-----------|-----------|
| C | 4.314868  | -1.787789 | -2.114201 |
| C | 3.790991  | -0.692298 | -2.847139 |
| C | 2.448237  | -0.374591 | -2.740914 |
| C | -3.084088 | -1.680371 | -0.326667 |
| C | -4.301767 | -1.113008 | 0.065193  |
| C | -5.511352 | -1.991958 | 0.261455  |
| F | -5.167724 | -3.282059 | 0.534038  |
| F | -6.311650 | -2.015525 | -0.838974 |
| F | -6.282507 | -1.551482 | 1.299664  |
| C | -4.426742 | 0.270775  | 0.259862  |
| C | -3.310258 | 1.083697  | 0.036329  |
| C | -3.412317 | 2.580225  | 0.182207  |
| F | -2.350206 | 3.094150  | 0.875376  |
| F | -4.541432 | 2.959209  | 0.844956  |
| F | -3.426179 | 3.205456  | -1.026041 |
| C | -2.081068 | 0.523119  | -0.338779 |
| H | -0.143342 | 0.120261  | -2.260849 |
| H | 3.921661  | -3.382419 | -0.731710 |
| H | 5.383639  | -2.017211 | -2.170718 |
| H | 4.452400  | -0.088834 | -3.476930 |
| H | 2.034849  | 0.493877  | -3.264353 |
| H | -3.017170 | -2.756703 | -0.487194 |
| H | -5.372321 | 0.705168  | 0.592363  |
| H | -1.209545 | 1.169824  | -0.475349 |
| H | 0.239809  | 0.657567  | 3.098302  |
| H | -0.745806 | -3.106301 | 0.531996  |
| H | 1.586815  | -3.914730 | 0.193470  |

---

 Statistical Thermodynamic Analysis

 Temperature= 233.150 Kelvin    Pressure= 1.00000 Atm
 

---

|                              |                |                   |               |
|------------------------------|----------------|-------------------|---------------|
| SCF Energy=                  | -2195.10705501 | Predicted Change= | -4.405008D-07 |
| Zero-point correction (ZPE)= | -2194.7678     |                   | 0.33918       |
| Internal Energy (U)=         | -2194.7463     |                   | 0.36074       |
| Enthalpy (H)=                | -2194.7455     |                   | 0.36148       |
| Gibbs Free Energy (G)=       | -2194.8186     |                   | 0.28842       |

---

 Frequencies --    2.4717            12.6234            19.9477

PBE-D3BJ/6-311++G(2df,p) = -2195.831779

PBE-D3BJ/6-311++G(2df,p)/SMD(Toluene) = -2195.849950

PBE/def2-TZVPP = -2195.64538813388

---

**Minor Interaction**

 Using Gaussian 09: AM64L-G09RevD.01 24-Apr-2013
 

---

```
# pbepbe/6-31G*/auto EmpiricalDispersion=GD3BJ gfpinput
scf=(direct,tight,maxcycle=300,xqc) opt=(maxcycle=250,modredundant,gdiis)
freq=noraman iop(1/8=18) Temperature=233.15 SCRF=(SMD,SOLVENT=Toluene)
Modredundant Input: X * B
Modredundant Input: X * F
Modredundant Input: X 50 A
Modredundant Input: X 51 A
Modredundant Input: X 52 A
```

Modredundant Input:

#N Geom=AllCheck Guess=TCheck SCRF=Check Test GenChk RPBEPBE/6-31G(d)/Auto  
Freq-----  
Pointgroup= C1 Stoichiometry= C26H14F12 C1[X(C26H14F12)] #Atoms= 52  
Charge = 0 Multiplicity = 1  
-----SCF Energy= -2195.10522033 Predicted Change= -6.117143D-06  
=====

| Item  | Max Val. | Criteria | {Found 1 times} | Pass? | RMS Val. | Criteria | Pass?   |
|-------|----------|----------|-----------------|-------|----------|----------|---------|
| Force | 0.00031  | 0.00045  | [ YES ]         |       | 0.00009  | 0.00030  | [ YES ] |
| Displ | 0.01570  | 0.00180  | [ NO ]          |       | 0.01570  | 0.00180  | [ NO ]  |

| Atomic Type | Coordinates (Angstroms) |           |           |
|-------------|-------------------------|-----------|-----------|
|             | X                       | Y         | Z         |
| C           | 2.278463                | -1.599708 | -1.602385 |
| C           | 0.929608                | -1.184045 | -1.485279 |
| C           | 0.031437                | -1.791706 | -0.611144 |
| C           | -1.345347               | -1.247691 | -0.474736 |
| C           | 0.512634                | -2.928325 | 0.124522  |
| C           | 1.790183                | -3.466029 | -0.045162 |
| C           | 2.736747                | -2.740928 | -0.854976 |
| C           | 4.114450                | -3.090509 | -0.937720 |
| C           | 4.981442                | -2.374464 | -1.747372 |
| C           | 4.518191                | -1.276256 | -2.516989 |
| C           | 3.191715                | -0.893531 | -2.438585 |
| C           | -1.587732               | 0.121612  | -0.730771 |
| C           | -2.872168               | 0.666519  | -0.611528 |
| C           | -3.091765               | 2.146946  | -0.810838 |
| F           | -4.287609               | 2.398850  | -1.408204 |
| F           | -2.120730               | 2.717017  | -1.568485 |
| F           | -3.108094               | 2.808506  | 0.387356  |
| C           | -3.952782               | -0.122957 | -0.197665 |
| C           | -3.721226               | -1.479354 | 0.060707  |
| C           | -4.866788               | -2.341082 | 0.522011  |
| F           | -5.601444               | -1.703925 | 1.485214  |
| F           | -4.429503               | -3.514266 | 1.075069  |
| F           | -5.723704               | -2.663551 | -0.478317 |
| C           | -2.449325               | -2.042943 | -0.097227 |
| H           | 0.597253                | -0.352057 | -2.113977 |
| H           | 4.490297                | -3.925110 | -0.341684 |
| H           | 6.038785                | -2.655260 | -1.786367 |
| H           | 5.215216                | -0.724455 | -3.155483 |
| H           | 2.821164                | -0.031330 | -3.004183 |
| H           | -0.762842               | 0.784030  | -1.000706 |
| H           | -4.947510               | 0.312982  | -0.070151 |
| H           | -2.319116               | -3.105109 | 0.097683  |
| C           | 0.106497                | 0.792023  | 2.273534  |
| C           | 1.339474                | 0.111325  | 2.272522  |
| C           | 2.412265                | 0.619140  | 1.535050  |
| C           | 3.752523                | -0.071794 | 1.605929  |
| F           | 4.538001                | 0.477434  | 2.577683  |
| F           | 4.436682                | 0.037332  | 0.436046  |
| F           | 3.630195                | -1.394890 | 1.895586  |

|   |           |           |           |
|---|-----------|-----------|-----------|
| C | 2.268150  | 1.782095  | 0.768278  |
| C | 1.032601  | 2.444585  | 0.775236  |
| C | 0.830549  | 3.597997  | -0.174198 |
| F | 1.904500  | 4.433002  | -0.198823 |
| F | -0.265444 | 4.337405  | 0.124894  |
| F | 0.668975  | 3.133280  | -1.454397 |
| C | -0.047584 | 1.977435  | 1.534557  |
| H | 1.444839  | -0.821081 | 2.833525  |
| H | 3.098865  | 2.157431  | 0.165339  |
| H | -1.003535 | 2.499917  | 1.520466  |
| H | -0.733366 | 0.394313  | 2.850282  |
| H | 2.110431  | -4.345313 | 0.520716  |
| H | -0.180178 | -3.434815 | 0.807312  |

-----  
Statistical Thermodynamic Analysis

Temperature= 233.150 Kelvin    Pressure= 1.00000 Atm

|                              |                |                   |               |
|------------------------------|----------------|-------------------|---------------|
| SCF Energy=                  | -2195.10522033 | Predicted Change= | -6.117143D-06 |
| Zero-point correction (ZPE)= | -2194.7658     |                   | 0.33934       |
| Internal Energy (U)=         | -2194.7451     |                   | 0.36009       |
| Enthalpy (H)=                | -2194.7443     |                   | 0.36083       |
| Gibbs Free Energy (G)=       | -2194.8137     |                   | 0.29146       |

-----  
Frequencies --    -14.0970            4.3534            13.4108

PBE-D3BJ/6-311++G(2df,p) = -2195.828480

PBE-D3BJ/6-311++G(2df,p)/SMD(Toluene) = -2195.846926

PBE/def2-TZVPP = -2195.63800322790

**Bibliography**

1. D. D. Perrin and W. L. Armarego, *Purification of Laboratory Chemicals*, Pergamon Press, Oxford, 3rd edn., 1988.
2. M. A. Maskeri, M. J. O'Connor, A. A. Jaworski, A. V. Davies and K. A. Scheidt, *Angew. Chem., Int. Ed.*, 2018, **57**, 17225-17229.
3. D. J. Wilbur and J. Jonas, *The Journal of Chemical Physics*, 1975, **62**, 2800-2807.
4. F. J. V. Santos, C. A. Nieto de Castro, J. H. Dymond, N. K. Dalaouti, M. J. Assael and A. Nagashima, *J. Phys. Chem. Ref. Data*, 2006, **35**, 1-8.
5. J. P. Perdew, K. Burke and M. Ernzerhof, *Phys. Rev. Lett.*, 1996, **77**, 3865-3868.
6. S. Grimme, S. Ehrlich and L. Goerigk, *J. Comput. Chem.*, 2011, **32**, 1456-1465.
7. W. J. Hehre, R. Ditchfield and J. A. Pople, *J. Chem. Phys.*, 1972, **56**, 2257-2261.
8. A. V. Marenich, C. J. Cramer and D. G. Truhlar, *J. Phys. Chem. B*, 2009, **113**, 6378-6396.
9. F. Weigend and R. Ahlrichs, *PCCP*, 2005, **7**, 3297-3305.
10. F. Weigend, *PCCP*, 2006, **8**, 1057-1065.
11. F. Neese, *Wiley Interdiscip. Rev.: Comput. Mol. Sci.*, 2011, **2**, 73-78.
12. A. D. McLean and G. S. Chandler, *J. Chem. Phys.*, 1980, **72**, 5639-5648.
13. R. Krishnan, J. S. Binkley, R. Seeger and J. A. Pople, *J. Chem. Phys.*, 1980, **72**, 650-654.
14. C. Y. Legault, CYLview, 1.0b, <http://www.cylview.org>.
15. S. Das, L. Liu, Y. Zheng, M. W. Alachraf, W. Thiel, C. K. De and B. List, *J. Am. Chem. Soc.*, 2016, **138**, 9429-9432.
